# Supplementary material for: AlCl3-mediated “Heine-type” ring-opening of N-cyclopropylamides for the synthesis of 5-methyl-2-oxazolines
Source: Royal Society of Chemistry journal article supplement (doi:10.1039/d5ob01040c), 2025-01-01
Supplement: d5ob01040c1.pdf [file d5ob01040c1.pdf]

## Content

|                                                                                                 | Page |
|-------------------------------------------------------------------------------------------------|------|
| I. General Information                                                                          | S1   |
| II. Preparation of Compounds <b>1</b> , <b>4</b> , <b>6</b> , <b>8</b> , <b>9</b> and <b>11</b> | S2   |
| III. Synthesis of Products <b>2</b> and <b>3</b>                                                | S3   |
| IV. Gram-Scale Reaction of <b>1a</b>                                                            | S3   |
| V. Synthesis of Compound <b>5</b>                                                               | S4   |
| VI. Synthesis of Compound <b>10</b>                                                             | S4   |
| VII. Synthesis of <b>13</b> and <b>14</b>                                                       | S5   |
| VIII. Synthesis of Compound <b>15</b>                                                           | S5   |
| IX. Spectral Data of Substrates and Products                                                    | S6   |
| X. References                                                                                   | S21  |
| XI. 1D and 2D NMR Spectra                                                                       | S23  |

## I. General Information

$^1\text{H}$  and  $^{13}\text{C}$  spectra were recorded (as indicated) either on a Bruker 400 MHz spectrometer.  $^1\text{H}$  NMR chemical shifts ( $\delta$ ) are reported in ppm relative to residual signals of the solvents ( $\text{CDCl}_3$ : 7.26 ppm;  $\text{SO}(\text{CD}_3)_2$ : 2.50 ppm).  $^{13}\text{C}$  NMR chemical shifts were reported in ppm relative to the solvent ( $\text{CDCl}_3$ : 77.16 ppm;  $\text{SO}(\text{CD}_3)_2$ : 39.92 ppm). Spin multiplicities are reported as a singlet (s), doublet (d), triplet (t) and quartet (q), with coupling constants ( $J$ ) given in Hz, or multiplet (m). High resolution mass spectrometry (HRMS) was obtained on a Q-TOF micro spectrometer. Melting points were determined with an auto melting point system. TLC plates were visualized under ultraviolet light and colored with potassium permanganate ( $\text{KMnO}_4$ ) solution and Iodine ( $\text{I}_2$ ).

Unless otherwise noted, reagents and solvents were purchased as reagent grade and were used without further purification. Dichloromethane, 1,2-dichloroethane, chloroform and carbon tetrachloride were dried with activated molecular sieves. Flash column chromatography was performed over silica gel (200-300 m) using a mixture of ethyl acetate and petroleum ether.

## II. Preparation of Compounds **1**, **4**, **6**, **8**, **9** and **11**

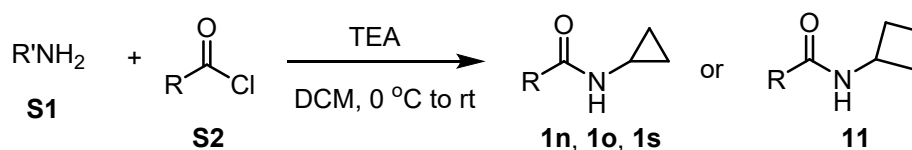

**General procedure a:**<sup>[S1]</sup> To the solution of amine **S1** (10.0 mmol) and triethylamine (20.0 mmol) in DCM (50 mL) was added acyl chloride **S2** (10.0 mmol) dropwise or gradually in ca. 0.5-2 h at 0 °C. The reaction mixture was then warmed to room temperature and stirred overnight. The resulting mixture was quenched with saturated NH<sub>4</sub>Cl aqueous solution (50 mL) and extracted with DCM (3 x 100 mL). The combined organic phases were dried over anhydrous Na<sub>2</sub>SO<sub>4</sub>, filtered and concentrated in vacuo. The given residue was purified by flash chromatography on silica gel using a mixture of EtOAc and PE (25-40%, V/V) as eluent to provide the amide substrates **1** and **11**.

Compound **1a** was synthesized as described in ref. S2.

Compound **1b** was synthesized as described in ref. S2.

Compound **1c** was synthesized as described in ref. S3.

Compound **1d** was synthesized as described in ref. S4.

Compound **1e** was synthesized as described in ref. S5.

Compound **1f** was synthesized as described in ref. S6.

Compound **1g** was synthesized as described in ref. S7.

Compound **1h** was synthesized as described in ref. S8.

Compound **1i** was synthesized as described in ref. S9.

Compound **1j** was synthesized as described in ref. S7.

Compound **1k** was synthesized as described in ref. S10.

Compound **1l** was synthesized as described in ref. S2.

Compound **1m** was synthesized as described in ref. S11.

Compound **1m** was synthesized as described in ref. S12.

Compound **1q** was synthesized as described in ref. S13.

Compound **1r** was synthesized as described in ref. S14.

Compound **1t** was synthesized as described in ref. S15.

Compound **4** was synthesized as described in ref. S16.

Compound **6** was synthesized as described in ref. S17.

Compound **8** was synthesized as described in ref. S18.

Compound **9** was synthesized as described in ref. S19.

### III. Synthesis of Products **2** and **3**

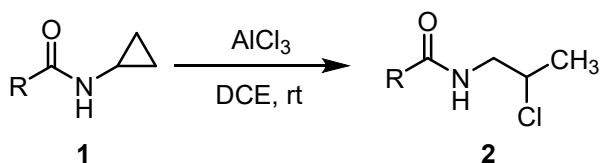

**General procedure b:** To an oven dried round bottom flask equipped with a glass stopper was added amide substrates (0.3 mmol),  $\text{AlCl}_3$  (0.6-0.9 mmol), and 4 mL of freshly-dried solvent (DCE) at rt. The mixture was stirred at rt for 4 to 48 h. The resulting mixture was directly purified by flash chromatography on silica gel using a mixture of EtOAc and PE (25-60%, V/V) as eluent to provide the chlorinated intermediates **2**.

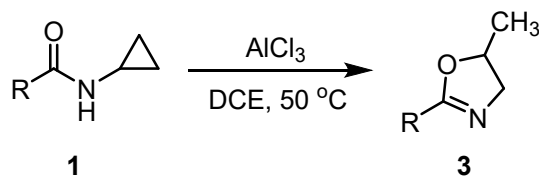

**General procedure c:** To an oven dried round bottom flask equipped with a glass stopper was added amide substrates **1** (0.3 mmol),  $\text{AlCl}_3$  (1.5 mmol), and 4 mL of freshly-dried solvent (DCE) at rt. The mixture was stirred at 50 °C within 4-6 h. TLC was utilized for detecting the reaction till the total consumption of the starting materials. The resulting mixture was directly purified by flash chromatography on silica gel using a mixture of EtOAc and PE (15-50%, V/V) as eluent to provide products **3**.

### IV. Gram-Scale Reaction of **1a**

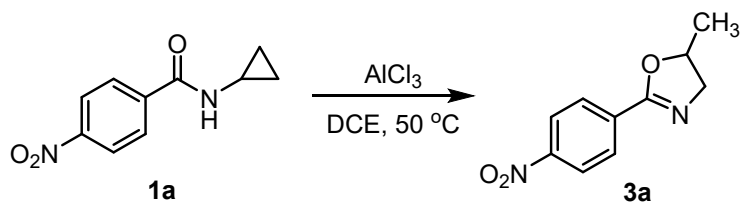

**General procedure d:** To an oven dried round bottom flask equipped with a glass stopper was added substrate **1a** (2.12 g, 10.0 mmol),  $\text{AlCl}_3$  (6.68 g, 45.0 mmol), and

freshly-dried DCE (40 mL) at rt. The suspension was stirred at 50 °C for 8 h till the total consumption of the starting material. The resulting mixture was quenched in time with water (50 mL) and then extracted with DCM (3 x 100 mL). The combined organic phases were washed with brine, dried over anhydrous Na<sub>2</sub>SO<sub>4</sub> and evaporated under reduced pressure to remove the solvent. The given residue was purified by flash chromatography on silica gel using a mixture of EtOAc and PE (25%, V/V) as eluent to provide 1.67 g (81% yield) of the oxazoline product **3a**.

## V. Synthesis of Compound 5

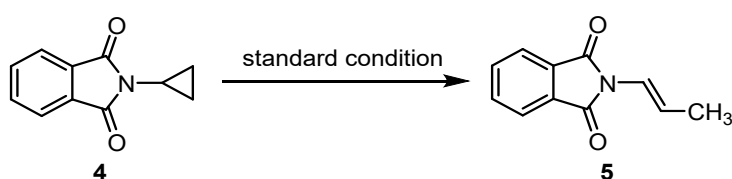

**General procedure e:** To an oven dried round bottom flask equipped with a glass stopper was added substrate **4** (150 mg, 0.802 mmol), AlCl<sub>3</sub> (537 mg, 4.0 mmol), and freshly-dried DCE (4 mL) at rt. The suspension was stirred at 50 °C for 4 h till the total consumption of the starting material. The resulting mixture was quenched in time with water (50 mL) and then extracted with DCM (3 x 100 mL). The combined organic phases were washed with brine, dried over anhydrous Na<sub>2</sub>SO<sub>4</sub> and evaporated under reduced pressure to remove the solvent. The given residue was purified by flash chromatography on silica gel using a mixture of EtOAc and PE (10%, V/V) as eluent to provide compound **5** in 77% yield.

## VI. Synthesis of Compound 10

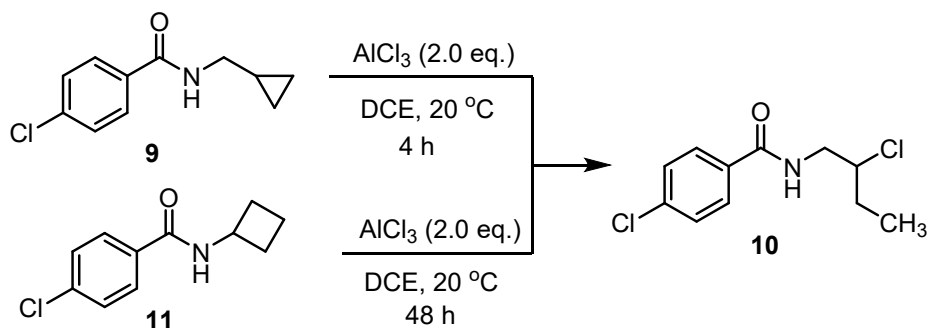

**General procedure f:** To an oven dried round bottom flask equipped with a glass stopper was added amide substrates **9** or **11** (0.3 mmol), AlCl<sub>3</sub> (0.6 mmol), and 4 mL

of freshly-dried solvent (DCE) at rt. The mixture was stirred at 20 °C for 4 h (for **9**) or 48 h (for **11**). The resulting mixture was directly purified by flash chromatography on silica gel using a mixture of EtOAc and PE (15%, V/V) as eluent to give compound **10**.

## VII. Synthesis of **13** and **14**

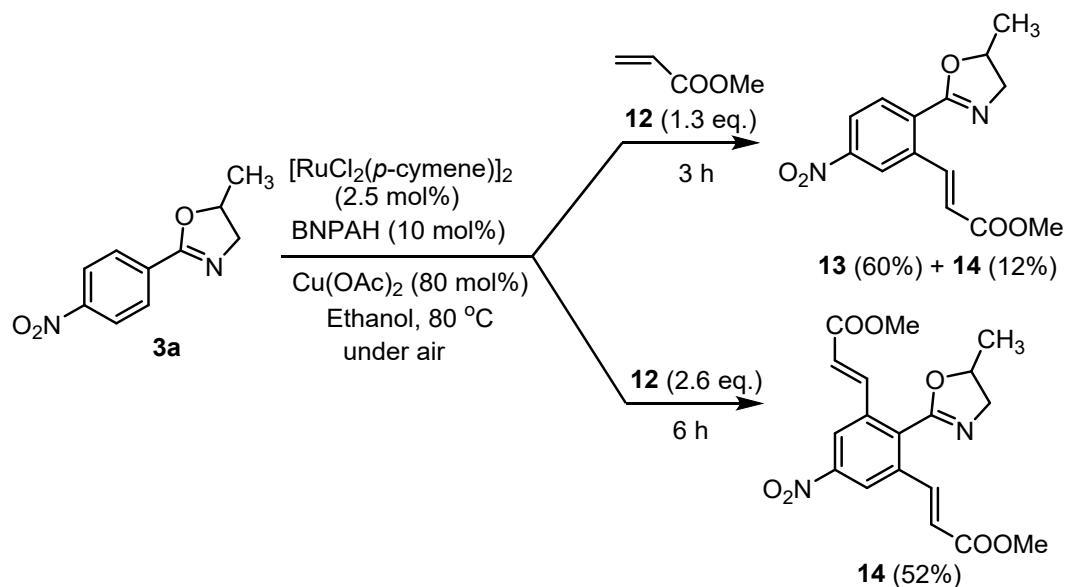

**General procedure g:**<sup>[20]</sup>  $[\text{RuCl}_2(\text{p-cymene})]_2$  (0.025 mmol, 15.3 mg), alkene **12** (0.65 or 1.3 mmol), oxazoline **3a** (0.5 mmol),  $\text{Cu}(\text{OAc})_2 \cdot \text{H}_2\text{O}$  (0.4 mmol, 80 mg), 1,1'-binaphthyl-2,2'-diyl hydrogenphosphate (0.05 mmol, 17.4 mg) and ethanol (2 mL) were introduced in a tube sealing, equipped with a magnetic stirring bar and stirred at 80 °C. TLC was utilized for detecting the reaction till the total consumption of the starting materials. The solvent was then evaporated under vacuum and the desired product **13** or **14** was purified by silica gel column chromatography using a mixture of EtOAc and PE (25%, V/V) as the eluent.

## VIII. Synthesis of Compound **15**

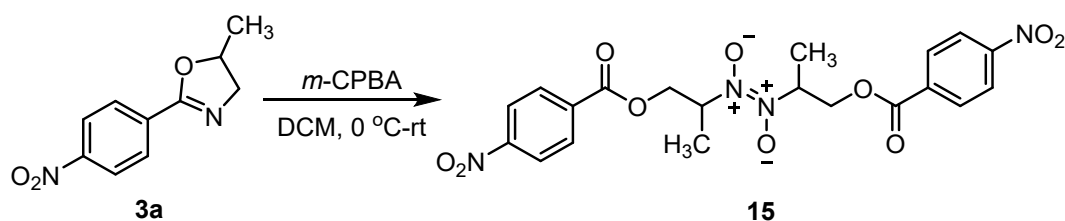

**General procedure h:**<sup>[21]</sup> A solution of  $m\text{-CPBA}$  (540 mg, 2.2 mmol, 70%) in  $\text{CH}_2\text{Cl}_2$  (10 mL), previously cooled in an ice bath, was added dropwise to an ice cooled solution of the product **3a** (1.0 mmol) in  $\text{CH}_2\text{Cl}_2$  (10 mL). The mixture was allowed to gradually

warm to room temperature (with stirring) over a 12 h period. After further dilution with  $\text{CH}_2\text{Cl}_2$  (10 mL), the solution was stirred with excess powdered anhydrous sodium carbonate until carbon dioxide evolution ceased. After filtration, the solvent was evaporated in *vacuo* and purified by silica gel column chromatography using a mixture of EtOAc and PE (25%, V/V) as the eluent to give the dimer product **15** as a colorless solid.

## IX. Spectral Data of Substrates and Products

### 1. Spectral data of substrates **1**

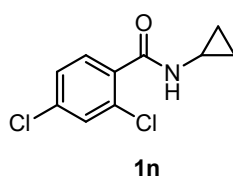

#### 2,4-Dichloro-*N*-cyclopropylbenzamide (**1n**)

Following the general procedure **a**, **1n** was purified by silica gel chromatography (30% EtOAc/PE). Yield: 77%, colorless solid, mp. 144–147 °C.  $^1\text{H}$  NMR (400 MHz,  $\text{CDCl}_3$ )  $\delta$  7.60 (d,  $J = 8.4$  Hz, 1H), 7.39 (s, 1H), 7.29 (d,  $J = 8.4$  Hz, 1H), 6.36 (brs, 1H), 2.90 (tq,  $J = 7.4, 3.7$  Hz, 1H), 0.88 (q,  $J = 6.3$  Hz, 2H), 0.67 – 0.61 (m, 2H).  $^{13}\text{C}$  NMR (100 MHz,  $\text{CDCl}_3$ )  $\delta$  166.79, 136.77, 133.23, 131.46, 131.29, 129.98, 127.53, 23.19, 6.84. HRMS (ESI) calcd for  $\text{C}_{10}\text{H}_9\text{Cl}_2\text{NO}$   $[\text{M} + \text{H}]^+$  230.0134, found 230.0132.

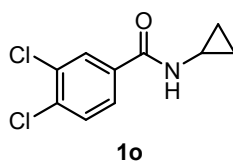

#### 2,5-Dichloro-*N*-cyclopropylbenzamide (**1o**)

Following the general procedure **a**, **1o** was purified by silica gel chromatography (30% EtOAc/PE). Yield: 78%, colorless solid, mp. 123–125 °C.  $^1\text{H}$  NMR (400 MHz,  $\text{CDCl}_3$ )  $\delta$  7.83 (d,  $J = 2.0$  Hz, 1H), 7.56 (dd,  $J = 8.3, 2.1$  Hz, 1H), 7.49 (d,  $J = 8.3$  Hz, 1H), 6.28 (brs, 1H), 2.88 (tq,  $J = 7.1, 3.7$  Hz, 1H), 0.95 – 0.83 (m, 2H), 0.67 – 0.60 (m, 2H).  $^{13}\text{C}$  NMR (100 MHz,  $\text{CDCl}_3$ )  $\delta$  166.68, 135.94, 134.19, 133.06, 130.63, 129.08, 126.06, 23.30, 6.81. HRMS (ESI) calcd for  $\text{C}_{10}\text{H}_9\text{Cl}_2\text{NO}$   $[\text{M} + \text{H}]^+$  230.0134, found 230.0135.

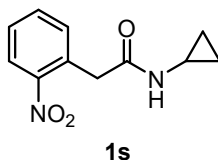

### ***N*-Cyclopropyl-2-(2-nitrophenyl)acetamide (1s)**

Following the general procedure **a**, **1s** was purified by silica gel chromatography (25% EtOAc/PE). Yield: 65%, colorless solid, mp. 153–156 °C. <sup>1</sup>H NMR (400 MHz, DMSO-*d*<sub>6</sub>) δ 8.15 (d, *J* = 4.1 Hz, 1H), 7.99 (dd, *J* = 8.1, 1.4 Hz, 1H), 7.66 (td, *J* = 7.5, 1.4 Hz, 1H), 7.52 (td, *J* = 7.7, 1.5 Hz, 1H), 7.46 (dd, *J* = 7.6, 1.5 Hz, 1H), 3.80 (s, 2H), 2.57 (tq, *J* = 7.6, 3.9 Hz, 1H), 0.60 (td, *J* = 6.9, 4.7 Hz, 2H), 0.45 – 0.32 (m, 2H). <sup>13</sup>C NMR (100 MHz, DMSO-*d*<sub>6</sub>) δ 170.00, 149.66, 133.84, 133.77, 131.38, 128.61, 124.89, 39.76, 22.83, 6.15. HRMS (ESI) calcd for C<sub>11</sub>H<sub>13</sub>N<sub>2</sub>O<sub>3</sub> [M + H]<sup>+</sup> 221.0921, found 221.0925.

### **2. Spectral data of intermediates **2****

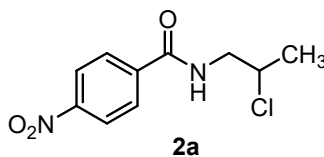

### ***N*-(2-chloropropyl)-4-nitrobenzamide (2a)**

Following the general procedure **b**, **2a** was purified by silica gel chromatography (25% EtOAc/PE). Yield: 45%, colorless solid. mp. >240 °C. <sup>1</sup>H NMR (400 MHz, CDCl<sub>3</sub>) δ 8.32 (d, *J* = 9.1 Hz, 2H), 7.96 (d, *J* = 8.9 Hz, 2H), 6.60 (brs, 1H), 4.35 – 4.24 (m, 1H), 4.01 (ddd, *J* = 14.3, 7.1, 3.3 Hz, 1H), 3.45 (ddd, *J* = 14.0, 8.4, 5.1 Hz, 1H), 1.59 (d, *J* = 6.6 Hz, 3H). <sup>13</sup>C NMR (100 MHz, CDCl<sub>3</sub>) δ 165.55, 139.67, 128.23, 123.96, 57.72, 47.59, 22.55. HRMS (ESI) calcd for C<sub>10</sub>H<sub>11</sub>ClN<sub>2</sub>O<sub>3</sub> [M + H]<sup>+</sup> 242.0458, found 242.0458.

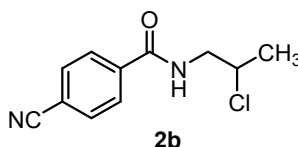

### ***N*-(2-Chloropropyl)-4-cyanobenzamide (2b)**

Following the general procedure **b**, **2b** was purified by silica gel chromatography (25% EtOAc/PE). Yield: 36%, colorless solid. mp. >240 °C. <sup>1</sup>H NMR (400 MHz,



CDCl<sub>3</sub>)  $\delta$  7.89 (d,  $J$  = 7.6 Hz, 2H), 7.76 (d,  $J$  = 8.4 Hz, 2H), 6.60 (brs, 1H), 4.28 (ddt,  $J$  = 10.7, 7.1, 5.1 Hz, 1H), 3.99 (ddd,  $J$  = 14.3, 6.9, 3.4 Hz, 1H), 3.43 (ddd,  $J$  = 13.9, 8.4, 5.1 Hz, 1H), 1.58 (d,  $J$  = 6.5 Hz, 3H). <sup>13</sup>C NMR (100 MHz, CDCl<sub>3</sub>)  $\delta$  165.81, 138.02, 132.57, 127.75, 117.96, 115.39, 57.75, 47.54, 22.55. HRMS (ESI) calcd for C<sub>11</sub>H<sub>12</sub>ClN<sub>2</sub>O [M + H]<sup>+</sup> 223.0633, found 223.0629.

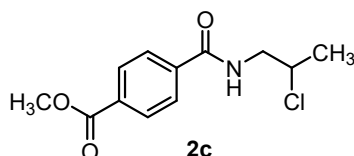

### Methyl 4-((2-chloropropyl)carbamoyl)benzoate (2c)

Following the general procedure **b**, **2c** was purified by silica gel chromatography (25% EtOAc/PE). Yield: 20%, pale-yellow oil. <sup>1</sup>H NMR (400 MHz, CDCl<sub>3</sub>)  $\delta$  8.11 (d,  $J$  = 8.4 Hz, 2H), 7.85 (d,  $J$  = 8.5 Hz, 2H), 6.68 (brs, 1H), 4.34 – 4.23 (m, 1H), 4.02 – 3.94 (m, 1H), 3.95 (s, 3H), 3.45 (ddd,  $J$  = 13.9, 8.4, 5.1 Hz, 1H), 1.58 (d,  $J$  = 6.7 Hz, 3H). <sup>13</sup>C NMR (100 MHz, CDCl<sub>3</sub>)  $\delta$  166.72, 166.25, 138.01, 132.97, 129.95, 127.07, 57.88, 52.47, 47.48, 22.57. HRMS (ESI) calcd for C<sub>12</sub>H<sub>15</sub>ClNO<sub>3</sub> [M + H]<sup>+</sup> 256.0735, found 256.0737.

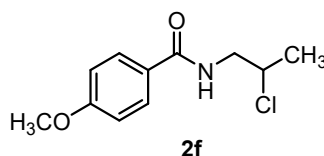

### N-(2-Chloropropyl)-4-methoxybenzamide (2f)

Following the general procedure **b**, **2f** was purified by silica gel chromatography (25% EtOAc/PE). Yield: 21%, pale-yellow oil. <sup>1</sup>H NMR (400 MHz, CDCl<sub>3</sub>)  $\delta$  7.76 (d,  $J$  = 8.8 Hz, 2H), 6.94 (d,  $J$  = 8.8 Hz, 2H), 6.48 (brs, 1H), 4.27 (dtd,  $J$  = 13.2, 6.6, 3.5 Hz, 1H), 4.00 – 3.93 (m, 1H), 3.86 (s, 3H), 3.42 (ddd,  $J$  = 13.8, 8.2, 5.1 Hz, 1H), 1.56 (s, 3H). <sup>13</sup>C NMR (100 MHz, CDCl<sub>3</sub>)  $\delta$  167.05, 162.38, 128.82, 126.38, 113.85, 58.27, 55.45, 47.34, 22.56. HRMS (ESI) calcd for C<sub>11</sub>H<sub>15</sub>ClNO<sub>2</sub> [M + H]<sup>+</sup> 228.0786, found 228.0788.

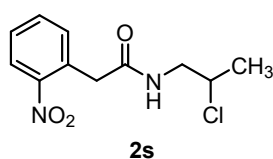

### N-(2-Chloropropyl)-2-(2-nitrophenyl)acetamide (2s)

Following the general procedure **b**, **2s** was purified by silica gel chromatography (25% EtOAc/PE). Yield: 34%, pale-yellow solid, mp. 89–91 °C.  $^1\text{H}$  NMR (400 MHz, DMSO- $d_6$ )  $\delta$  8.40 (brs, 1H), 8.00 (dd,  $J$  = 8.1, 1.2 Hz, 1H), 7.67 (td,  $J$  = 7.5, 1.3 Hz, 1H), 7.55 – 7.49 (m, 2H), 4.16 – 4.09 (m, 1H), 3.91 (s, 2H), 3.31 (td,  $J$  = 6.1, 2.9 Hz, 2H), 1.41 (d,  $J$  = 6.5 Hz, 3H).  $^{13}\text{C}$  NMR (400 MHz, CDCl<sub>3</sub>)  $\delta$   $^{13}\text{C}$  NMR (100 MHz, DMSO- $d_6$ )  $\delta$  169.20, 148.81, 133.71, 133.45, 130.15, 128.62, 125.27, 57.61, 47.16, 41.02, 22.39. HRMS (ESI) calcd for C<sub>11</sub>H<sub>14</sub>ClN<sub>2</sub>O<sub>3</sub> [M + H]<sup>+</sup> 257.0687, found 257.0686.

### 3. Spectral data of products **3**

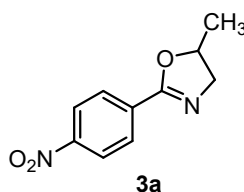

#### 5-Methyl-2-(4-nitrophenyl)-4,5-dihydrooxazole (**3a**)

Following the general procedure **c**, **3a** was purified by silica gel chromatography (33% EtOAc/PE). Yield: 94%, light-brown solid, mp. 125–127 °C.<sup>[22]</sup>  $^1\text{H}$  NMR (400 MHz, CDCl<sub>3</sub>)  $\delta$  8.26 (d,  $J$  = 8.9 Hz, 2H), 8.11 (d,  $J$  = 8.9 Hz, 2H), 4.92 (ddq,  $J$  = 9.4, 7.4, 6.2 Hz, 1H), 4.20 (dd,  $J$  = 15.0, 9.5 Hz, 1H), 3.66 (dd,  $J$  = 15.0, 7.6 Hz, 1H), 1.45 (d,  $J$  = 6.2 Hz, 3H).  $^{13}\text{C}$  NMR (100 MHz, CDCl<sub>3</sub>)  $\delta$  162.18, 149.45, 133.82, 129.16, 123.53, 77.17, 61.81, 21.11. HRMS (ESI) calcd for C<sub>10</sub>H<sub>10</sub>N<sub>2</sub>NaO<sub>3</sub><sup>+</sup> [M + Na]<sup>+</sup> 229.0584, found 229.0581.

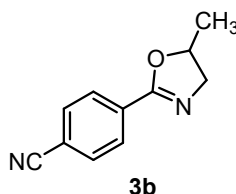

#### 5-Methyl-2-(4-cyanoophenyl)-4,5-dihydrooxazole (**3b**)

Following the general procedure **c**, **3b** was purified by silica gel chromatography (25% EtOAc/PE). Yield: 90%, light-yellow solid, mp. 93–95 °C.  $^1\text{H}$  NMR (400 MHz, CDCl<sub>3</sub>)  $\delta$  8.03 (d,  $J$  = 8.5 Hz, 2H), 7.70 (d,  $J$  = 8.5 Hz, 2H), 4.94 – 4.85 (m, 1H), 4.18 (dd,  $J$  = 14.9, 9.4 Hz, 1H), 3.64 (dd,  $J$  = 14.9, 7.5 Hz, 1H), 1.43 (d,  $J$  = 6.2 Hz, 3H).  $^{13}\text{C}$  NMR (100 MHz, CDCl<sub>3</sub>)  $\delta$  162.36, 132.19, 132.11, 128.68, 118.31, 114.64, 76.94,

61.77, 21.10. HRMS (ESI) calcd for  $C_{11}H_{10}N_2NaO$   $[M + Na]^+$  209.0685, found 209.0689.

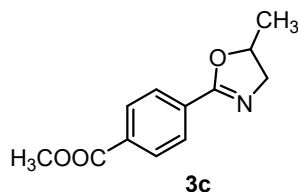

#### Methyl 4-(5-methyl-4,5-dihydrooxazol-2-yl)benzoate (**3c**)

Following the general procedure **c**, **3c** was purified by silica gel chromatography (33% EtOAc/PE). Yield: 72%, light-yellow solid, mp. 110–111 °C.  $^1H$  NMR (400 MHz,  $CDCl_3$ )  $\delta$  8.07 (d,  $J$  = 8.3 Hz, 2H), 8.00 (d,  $J$  = 8.2 Hz, 2H), 4.94 – 4.81 (m, 1H), 4.17 (dd,  $J$  = 14.7, 9.4 Hz, 1H), 3.93 (s, 3H), 3.63 (dd,  $J$  = 14.7, 7.5 Hz, 1H), 1.44 (d,  $J$  = 6.2 Hz, 3H).  $^{13}C$  NMR (100 MHz,  $CDCl_3$ )  $\delta$  166.53, 163.16, 132.36, 132.08, 129.53, 128.10, 76.64, 61.73, 52.33, 21.13. HRMS (ESI) calcd for  $C_{12}H_{13}NNaO_3$   $[M + Na]^+$  242.0788, found 242.0791.

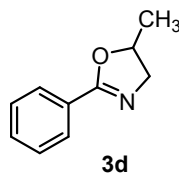

#### 5-Methyl-2-phenyl-4,5-dihydrooxazole (**3d**)

Following the general procedure **c**, **3d** was purified by silica gel chromatography (25% EtOAc/PE). Yield: 39%, light-yellow oil.<sup>[23]</sup>  $^1H$  NMR (400 MHz,  $CDCl_3$ )  $\delta$  7.94 – 7.91 (m, 2H), 7.45 (t,  $J$  = 7.3 Hz, 1H), 7.38 (d,  $J$  = 7.1 Hz, 2H), 4.92 – 4.76 (m, 1H), 4.12 (dd,  $J$  = 14.5, 9.4 Hz, 1H), 3.59 (dd,  $J$  = 14.4, 7.4 Hz, 1H), 1.41 (d,  $J$  = 6.2 Hz, 3H).  $^{13}C$  NMR (100 MHz,  $CDCl_3$ )  $\delta$  163.92, 131.22, 128.30, 128.10, 128.03, 76.27, 61.54, 21.13. HRMS (ESI) calcd for  $C_{10}H_{11}NNaO$   $[M + Na]^+$  184.0733, found 184.0730.

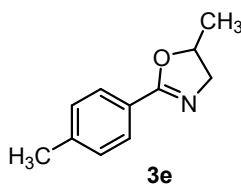

#### 5-Methyl-2-(*p*-tolyl)-4,5-dihydrooxazole (**3e**)

Following the general procedure **c**, **3e** was purified by silica gel chromatography

(20% EtOAc/PE). Yield: 36%, light-yellow oil.<sup>[22]</sup> <sup>1</sup>H NMR (400 MHz, CDCl<sub>3</sub>) δ 7.82 (d, *J* = 8.2 Hz, 2H), 7.21 (d, *J* = 8.0 Hz, 2H), 4.83 (ddd, *J* = 9.3, 7.2, 6.1 Hz, 1H), 4.13 (dd, *J* = 14.3, 9.4 Hz, 1H), 3.59 (dd, *J* = 14.4, 7.4 Hz, 1H), 2.38 (s, 3H), 1.42 (d, *J* = 6.2 Hz, 3H). <sup>13</sup>C NMR (100 MHz, CDCl<sub>3</sub>) δ 164.11, 141.64, 129.04, 128.10, 125.15, 76.23, 61.39, 21.56, 21.13. HRMS (ESI) calcd for C<sub>11</sub>H<sub>13</sub>NNaO [M + Na]<sup>+</sup> 198.0889, found 198.0885.

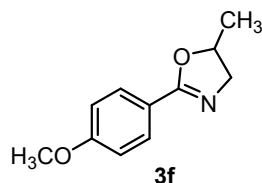

### 2-(4-Methoxyphenyl)-5-methyl-4,5-dihydrooxazole (3f)

Following the general procedure **c**, **3f** was purified by silica gel chromatography (33% EtOAc/PE). Yield: 30%, light-yellow oil.<sup>[24]</sup> <sup>1</sup>H NMR (400 MHz, CDCl<sub>3</sub>) δ 7.88 (d, *J* = 8.7 Hz, 2H), 6.91 (d, *J* = 8.7 Hz, 2H), 4.87 – 4.79 (m, 1H), 4.12 (dd, *J* = 14.2, 9.3 Hz, 1H), 3.85 (s, 3H), 3.59 (dd, *J* = 14.2, 7.3 Hz, 1H), 1.42 (d, *J* = 6.2 Hz, 3H). <sup>13</sup>C NMR (100 MHz, CDCl<sub>3</sub>) δ 167.12, 162.04, 128.62, 127.13, 113.71, 77.25, 55.40, 41.72, 22.99, 11.46. HRMS (ESI) calcd for C<sub>11</sub>H<sub>13</sub>NNaO<sub>2</sub> [M + Na]<sup>+</sup> 214.0838, found 214.0837.

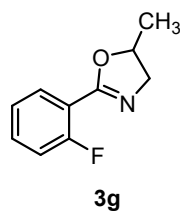

### 2-(2-Fluorophenyl)-5-methyl-4,5-dihydrooxazole (3g)

Following the general procedure **c**, **3g** was purified by silica gel chromatography (20% EtOAc/PE). Yield: 40%, light-yellow oil. <sup>1</sup>H NMR (400 MHz, CDCl<sub>3</sub>) δ 7.86 (td, *J* = 7.6, 1.8 Hz, 1H), 7.47 – 7.39 (m, 1H), 7.20 – 7.16 (m, 1H), 7.13 (dd, *J* = 9.5, 6.7 Hz, 1H), 4.89 – 4.77 (m, 1H), 4.18 (dd, *J* = 14.6, 9.4 Hz, 1H), 3.66 (dd, *J* = 14.6, 7.4 Hz, 1H), 1.42 (d, *J* = 6.2 Hz, 3H). <sup>13</sup>C NMR (100 MHz, CDCl<sub>3</sub>) δ 161.23 (d, *J* = 257.9 Hz), 160.70, 132.84 (d, *J* = 8.8 Hz), 131.00 (d, *J* = 1.8 Hz), 123.95 (d, *J* = 3.9 Hz), 116.68 (d, *J* = 22.2 Hz), 116.42 (d, *J* = 29.7 Hz), 75.90, 61.75, 21.08. <sup>19</sup>F NMR (376

Hz, CDCl<sub>3</sub>)  $\delta$  -112.56. HRMS (ESI) calcd for C<sub>10</sub>H<sub>10</sub>FNNaO [M + Na]<sup>+</sup> 202.0639, found 202.0642.

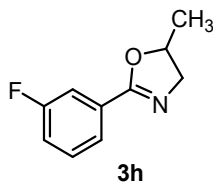

### 2-(3-fluorophenyl)-5-methyl-4,5-dihydrooxazole (**3h**)

Following the general procedure **c**, **3h** was purified by silica gel chromatography (20% EtOAc/PE). Yield: 59%, light-yellow oil.<sup>[25]</sup> <sup>1</sup>H NMR (400 MHz, CDCl<sub>3</sub>)  $\delta$  7.72 (d, *J* = 7.8 Hz, 1H), 7.62 (d, *J* = 9.7 Hz, 1H), 7.37 (td, *J* = 8.0, 5.6 Hz, 1H), 7.16 (td, *J* = 8.4, 2.7 Hz, 1H), 4.92 – 4.81 (m, 1H), 4.15 (dd, *J* = 14.6, 9.4 Hz, 1H), 3.61 (dd, *J* = 14.6, 7.5 Hz, 1H), 1.43 (d, *J* = 6.2 Hz, 3H). <sup>13</sup>C NMR (100 MHz, CDCl<sub>3</sub>)  $\delta$  162.87 (d, *J* = 3.2 Hz), 162.87 (d, *J* = 244.0 Hz), 130.17 (d, *J* = 8.3 Hz), 129.93 (d, *J* = 8.0 Hz), 123.82 (d, *J* = 3.0 Hz), 118.16 (d, *J* = 21.3 Hz), 115.11 (d, *J* = 23.5 Hz), 76.57, 61.58, 21.08. <sup>19</sup>F NMR (376 Hz, CDCl<sub>3</sub>)  $\delta$  -111.79. HRMS (ESI) calcd for C<sub>10</sub>H<sub>10</sub>FNNaO [M + Na]<sup>+</sup> 202.0639, found 202.0641.

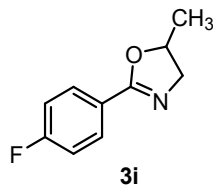

### 2-(4-Fluorophenyl)-5-methyl-4,5-dihydrooxazole (**3i**)

Following the general procedure **c**, **3i** was purified by silica gel chromatography (20% EtOAc/PE). Yield: 50%, light-yellow oil. <sup>1</sup>H NMR (400 MHz, CDCl<sub>3</sub>)  $\delta$  7.93 (dd, *J* = 8.6, 5.6 Hz, 2H), 7.08 (t, *J* = 8.6 Hz, 2H), 4.90 – 4.81 (m, 1H), 4.13 (dd, *J* = 14.4, 9.4 Hz, 1H), 3.60 (dd, *J* = 14.4, 7.4 Hz, 1H), 1.42 (d, *J* = 6.2 Hz, 3H). <sup>13</sup>C NMR (100 MHz, CDCl<sub>3</sub>)  $\delta$  164.44 (d, *J* = 286.8 Hz), 163.01, 130.33 (d, *J* = 8.9 Hz), 124.29 (d, *J* = 3.4 Hz), 115.40 (d, *J* = 22.0 Hz), 76.47, 61.56, 21.09. <sup>19</sup>F NMR (376 Hz, CDCl<sub>3</sub>)  $\delta$  -108.00. HRMS (ESI) calcd for C<sub>10</sub>H<sub>10</sub>FNNaO [M + Na]<sup>+</sup> 202.0639, found 202.0636.

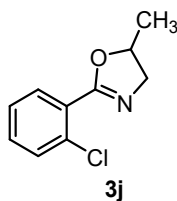

### 2-(2-Chlorophenyl)-5-methyl-4,5-dihydrooxazole (**3j**)

Following the general procedure **c**, **3j** was purified by silica gel chromatography (20% EtOAc/PE). Yield: 49%, light-yellow oil.  $^1\text{H}$  NMR (400 MHz,  $\text{CDCl}_3$ )  $\delta$  7.75 (d,  $J = 7.7$  Hz, 1H), 7.44 (d,  $J = 8.0$  Hz, 1H), 7.36 (t,  $J = 7.7$  Hz, 1H), 7.29 (t,  $J = 7.7$  Hz, 1H), 5.01 – 4.72 (m, 1H), 4.19 (dd,  $J = 14.5, 9.5$  Hz, 1H), 3.67 (dd,  $J = 14.5, 7.2$  Hz, 1H), 1.44 (d,  $J = 6.2$  Hz, 3H).  $^{13}\text{C}$  NMR (100 MHz,  $\text{CDCl}_3$ )  $\delta$  162.42, 133.39, 131.46, 131.24, 130.68, 127.68, 126.52, 76.29, 61.92, 21.06. HRMS (ESI) calcd for  $\text{C}_{10}\text{H}_9\text{ClNNaO}$   $[\text{M} + \text{Na}]^+$  218.0343, found 218.0341.

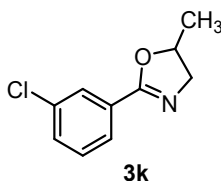

### 2-(3-Chlorophenyl)-5-methyl-4,5-dihydrooxazole (**3k**)

Following the general procedure **c**, **3k** was purified by silica gel chromatography (20% EtOAc/PE). Yield: 56%, light-yellow oil.  $^1\text{H}$  NMR (400 MHz,  $\text{CDCl}_3$ )  $\delta$  7.92 (s, 1H), 7.82 (d,  $J = 7.6$  Hz, 1H), 7.43 (d,  $J = 8.0$  Hz, 1H), 7.33 (t,  $J = 7.9$  Hz, 1H), 4.92 – 4.79 (m, 1H), 4.14 (dd,  $J = 14.6, 9.4$  Hz, 1H), 3.61 (dd,  $J = 14.6, 7.4$  Hz, 1H), 1.44 – 1.39 (m, 3H).  $^{13}\text{C}$  NMR (100 MHz,  $\text{CDCl}_3$ )  $\delta$  162.42, 133.39, 131.46, 131.24, 130.68, 127.68, 126.52, 76.29, 61.92, 21.06. HRMS (ESI) calcd for  $\text{C}_{10}\text{H}_9\text{ClNNaO}$   $[\text{M} + \text{Na}]^+$  218.0343, found 218.0342.

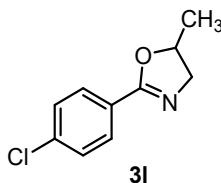

### 2-(4-Chlorophenyl)-5-methyl-4,5-dihydrooxazole (**3l**)

Following the general procedure **c**, **3l** was purified by silica gel chromatography (33% EtOAc/PE). Yield: 55%, light-yellow oil.<sup>[22]</sup>  $^1\text{H}$  NMR (400 MHz,  $\text{CDCl}_3$ )  $\delta$  7.87 (d,  $J = 8.6$  Hz, 2H), 7.38 (d,  $J = 8.6$  Hz, 2H), 4.85 (ddt,  $J = 13.7, 9.5, 6.2$  Hz, 1H), 4.14

(dd,  $J = 14.6, 9.4$  Hz, 1H), 3.60 (dd,  $J = 14.6, 7.4$  Hz, 1H), 1.42 (d,  $J = 6.2$  Hz, 3H).  $^{13}\text{C}$  NMR (100 MHz,  $\text{CDCl}_3$ )  $\delta$  163.07, 137.38, 129.47, 128.61, 126.55, 76.55, 61.61, 21.11. HRMS (ESI) calcd for  $\text{C}_{10}\text{H}_{10}\text{ClNNaO}$   $[\text{M} + \text{Na}]^+$  218.0343, found 218.0345.

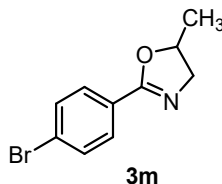

### 2-(4-Bromophenyl)-5-methyl-4,5-dihydrooxazole (3m)

Following the general procedure **c**, **3m** was purified by silica gel chromatography (15% EtOAc/PE). Yield: 52%, light-yellow oil.  $^1\text{H}$  NMR (400 MHz,  $\text{CDCl}_3$ )  $\delta$  7.80 (d,  $J = 8.6$  Hz, 2H), 7.54 (d,  $J = 8.4$  Hz, 2H), 4.90 – 4.81 (m, 1H), 4.13 (dd,  $J = 14.6, 9.4$  Hz, 1H), 3.59 (dd,  $J = 14.6, 7.5$  Hz, 1H), 1.42 (d,  $J = 6.3$  Hz, 3H).  $^{13}\text{C}$  NMR (100 MHz,  $\text{CDCl}_3$ )  $\delta$  163.14, 131.58, 129.67, 127.01, 125.86, 76.56, 61.64, 21.12. HRMS (ESI) calcd for  $\text{C}_{10}\text{H}_{10}\text{BrNNaO}$   $[\text{M} + \text{Na}]^+$  261.9838, found 261.9836.

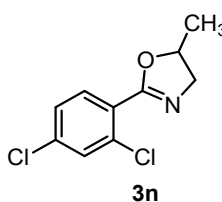

### 2-(2,4-Dichlorophenyl)-5-methyl-4,5-dihydrooxazole (3n)

Following the general procedure **c**, **3n** was purified by silica gel chromatography (20% EtOAc/PE). Yield: 85%, yellow oil.  $^1\text{H}$  NMR (400 MHz,  $\text{CDCl}_3$ )  $\delta$  7.72 (d,  $J = 8.4$  Hz, 1H), 7.46 (d,  $J = 2.0$  Hz, 1H), 7.28 (dd,  $J = 8.5, 2.2$  Hz, 1H), 4.91 – 4.80 (m, 1H), 4.18 (dd,  $J = 14.6, 9.4$  Hz, 1H), 3.66 (dd,  $J = 14.6, 7.3$  Hz, 1H), 1.43 (d,  $J = 6.2$  Hz, 3H).  $^{13}\text{C}$  NMR (100 MHz,  $\text{CDCl}_3$ )  $\delta$  161.58, 136.94, 134.36, 132.17, 130.63, 126.94, 126.09, 76.38, 61.97, 21.04. HRMS (ESI) calcd for  $\text{C}_{10}\text{H}_9\text{Cl}_2\text{NNaO}$   $[\text{M} + \text{Na}]^+$  251.9953, found 251.9956.

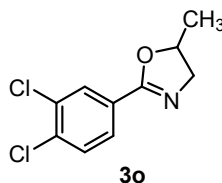

### 2-(3,4-Dichlorophenyl)-5-methyl-4,5-dihydrooxazole (3o)

Following the general procedure **c**, **3o** was purified by silica gel chromatography (20% EtOAc/PE). Yield: 60%, yellow oil.  $^1\text{H}$  NMR (400 MHz,  $\text{CDCl}_3$ )  $\delta$  8.02 (s, 1H), 7.76 (d,  $J = 8.4$  Hz, 1H), 7.47 (d,  $J = 8.4$  Hz, 1H), 4.92 – 4.81 (m, 1H), 4.14 (dd,  $J = 14.7, 9.4$  Hz, 1H), 3.60 (dd,  $J = 14.7, 7.5$  Hz, 1H), 1.42 (d,  $J = 6.2$  Hz, 3H).  $^{13}\text{C}$  NMR (100 MHz,  $\text{CDCl}_3$ )  $\delta$  162.06, 135.50, 132.70, 130.41, 130.06, 128.01, 127.25, 76.85, 61.66, 21.08. HRMS (ESI) calcd for  $\text{C}_{10}\text{H}_9\text{Cl}_2\text{NNaO}$   $[\text{M} + \text{Na}]^+$  251.9953, found 251.9954.

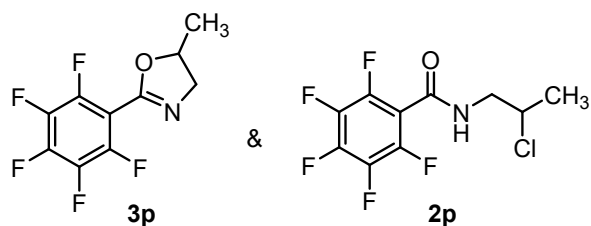

#### 5-Methyl-2-(perfluorophenyl)-4,5-dihydrooxazole (**3p**) and *N*-(2-chloropropyl)-2,3,4,5,6-pentafluorobenzamide (**2p**)

Following the general procedure **c**, **3p** and **3p'** were isolated as inseparable mixture by silica gel chromatography (20% EtOAc/PE). Yield: 84% (**3p/2p**=5/1), yellow oil.<sup>[26]</sup>  $^1\text{H}$  NMR (400 MHz,  $\text{CDCl}_3$ ) of **3p**:  $\delta$  4.97 – 4.80 (m, 1H), 4.19 (dd,  $J = 14.8, 9.5$  Hz, 1H), 3.67 (dd,  $J = 14.8, 7.3$  Hz, 1H), 1.57 (d,  $J = 6.6$  Hz, 1H), 1.44 (d,  $J = 6.0$  Hz, 3H).  $^1\text{H}$  NMR (400 MHz,  $\text{CDCl}_3$ ) of **2p**:  $\delta$  6.46 (s, 1H), 4.28 (qd,  $J = 7.0, 3.4$  Hz, 1H), 3.92 (ddd,  $J = 14.3, 6.7, 3.5$  Hz, 1H), 3.51 (ddd,  $J = 13.8, 7.9, 5.4$  Hz, 1H), 1.57 (d,  $J = 6.6$  Hz, 3H).  $^{13}\text{C}$  NMR (100 MHz,  $\text{CDCl}_3$ ) of **3p** and **2p**  $\delta$  166.81 (m), 154.53(m), 146.93(m), 145.04(m), 143.98(m), 141.41(m), 138.65(m), 137.09(m), 105.26(m), 61.81, 57.06, 47.62, 23.44, 22.48, 21.04, 6.99.  $^{19}\text{F}$  NMR (376 MHz,  $\text{CDCl}_3$ )  $\delta$  -136.88 – -136.93 (m), -137.24 – -137.32 (m), -140.21 – -140.58 (m), -149.98 – -150.12 (m), -150.28 – -150.75 (m), -159.76 – 160.14 (m), -160.89–161.03 (m). HRMS (ESI) calcd for  $\text{C}_{10}\text{H}_6\text{F}_5\text{NNaO}$   $[\text{M}(\mathbf{3p}) + \text{Na}]^+$  274.0262, found 274.0260. HRMS (ESI) calcd for  $\text{C}_{10}\text{H}_8\text{ClF}_5\text{NO}$   $[\text{M}(\mathbf{2p}) + \text{H}]^+$  288.0209, found 288.0211.

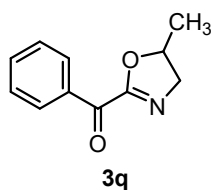



### (5-Methyl-4,5-dihydrooxazol-2-yl)(phenyl)methanone (3q)

Following the general procedure **c**, **3q** was purified by silica gel chromatography (25% EtOAc/PE). Yield: 67%, yellow solid, mp. 137–138 °C. <sup>1</sup>H NMR (400 MHz, CDCl<sub>3</sub>) δ 8.33 (d, *J* = 8.2 Hz, 2H), 7.64 (t, *J* = 7.4 Hz, 1H), 7.49 (t, *J* = 7.7 Hz, 2H), 4.21 (dddd, *J* = 10.6, 7.8, 6.7, 3.8 Hz, 1H), 3.82 (ddd, *J* = 14.1, 6.9, 3.9 Hz, 1H), 3.47 (ddd, *J* = 13.9, 7.9, 5.7 Hz, 1H), 1.56 (d, *J* = 6.6 Hz, 3H). <sup>13</sup>C NMR (100 MHz, CDCl<sub>3</sub>) δ 187.24, 161.86, 134.56, 133.19, 131.20, 128.57, 56.63, 46.87, 22.53. HRMS (ESI) calcd for C<sub>11</sub>H<sub>11</sub>NNaO<sub>2</sub> [M + Na]<sup>+</sup> 212.0682, found 212.0685.

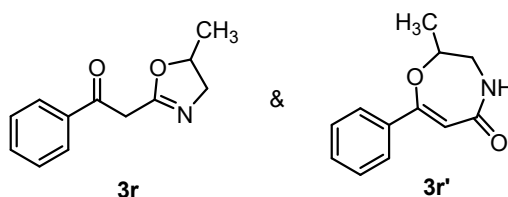

### 2-(5-methyl-4,5-dihydrooxazol-2-yl)-1-phenylethan-1-one (3r) & 2-methyl-7-phenyl-3,4-dihydro-1,4-oxazepin-5(2H)-one (3r')

Following the general procedure **c**, **3r** and **3r'** was purified by silica gel chromatography (25% EtOAc/PE). Yield: 63% (**3r/3r'**=6/1), yellow solid, mp. 134–136 °C. **3r**: <sup>1</sup>H NMR (400 MHz, CDCl<sub>3</sub>) δ 8.00 (d, *J* = 8.0 Hz, 2H), 7.63 (t, *J* = 7.5 Hz, 1H), 7.50 (t, *J* = 7.7 Hz, 2H), 4.23 – 4.12 (m, 1H), 4.00 (s, 2H), 3.80 – 3.71 (m, 1H), 3.36 (ddd, *J* = 13.8, 8.0, 5.3 Hz, 1H), 1.51 (d, *J* = 6.6 Hz, 3H). <sup>13</sup>C NMR (100 MHz, CDCl<sub>3</sub>): δ 195.78, 166.13, 136.11, 134.16, 128.91, 128.58, 57.08, 47.14, 45.13, 22.47. HRMS (ESI) calcd for C<sub>12</sub>H<sub>13</sub>NNaO<sub>2</sub> [M + Na]<sup>+</sup> 226.0838, found 226.0837. **3r'**: <sup>1</sup>H NMR (400 MHz, CDCl<sub>3</sub>) δ 14.02 (s, 1H), 7.75 (d, *J* = 8.1 Hz, 2H), 7.52 – (m, 1H), 7.42 (d, *J* = 7.4 Hz, 2H), 5.54 (s, 1H), 4.21 – 4.13 (m, 1H), 3.85 (ddd, *J* = 14.3, 7.0, 3.6 Hz, 1H), 3.40 – 3.33 (m, 1H), 1.55 (d, *J* = 6.7 Hz, 3H). <sup>13</sup>C NMR (100 MHz, CDCl<sub>3</sub>) δ 171.82, 134.12, 130.80, 128.49, 125.81, 88.34, 57.89, 46.56, 29.70 (One carbon signal was missing due to peak overlapped). HRMS (ESI) calcd for C<sub>12</sub>H<sub>13</sub>NNaO<sub>2</sub> [M + Na]<sup>+</sup> 226.0838, found 226.0837.

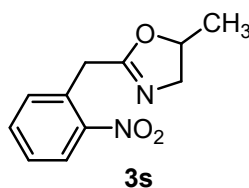

### 5-Methyl-2-(2-nitrobenzyl)-4,5-dihydrooxazole (3s)

Following the general procedure **c**, **3s** was purified by silica gel chromatography (40% EtOAc/PE). Yield: 50%, yellow oil.  $^1\text{H}$  NMR (400 MHz,  $\text{CDCl}_3$ )  $\delta$  8.06 (dd,  $J = 8.2, 1.4$  Hz, 1H), 7.59 (td,  $J = 7.6, 1.4$  Hz, 1H), 7.48 – 7.40 (m, 2H), 4.70 (ddq,  $J = 9.3, 7.1, 6.2$  Hz, 1H), 3.97 (d,  $J = 2.0$  Hz, 2H), 3.88 (ddt,  $J = 13.9, 9.4, 1.6$  Hz, 1H), 3.40 – 3.31 (m, 1H), 1.32 (d,  $J = 6.2$  Hz, 3H).  $^{13}\text{C}$  NMR (100 MHz,  $\text{CDCl}_3$ )  $\delta$  169.42, 148.85, 133.74, 133.51, 130.08, 128.65, 125.27, 57.57, 47.25, 41.04, 22.41. HRMS (ESI) calcd for  $\text{C}_{11}\text{H}_{12}\text{N}_2\text{NaO}_3$   $[\text{M} + \text{H}]^+$  243.0740, found 243.0741.

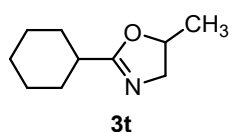

### 2-Cyclohexyl-5-methyl-4,5-dihydrooxazole (3t)

Following the general procedure **c**, **3t** was purified by silica gel chromatography (25% EtOAc/PE). Yield: 41%, pale-yellow oil.  $^1\text{H}$  NMR (400 MHz,  $\text{CDCl}_3$ )  $\delta$  4.62 (dt,  $J = 9.6, 6.4$  Hz, 1H), 3.89 (dd,  $J = 13.8, 9.3$  Hz, 1H), 3.36 (dd,  $J = 13.7, 7.0$  Hz, 1H), 2.25 (t,  $J = 11.5$  Hz, 1H), 1.92 (d,  $J = 11.3$  Hz, 2H), 1.76 (d,  $J = 9.1$  Hz, 2H), 1.45 – 1.35 (m, 2H), 1.29 (d,  $J = 6.1$  Hz, 3H), 1.32 – 1.18 (m, 4H).  $^{13}\text{C}$  NMR (100 MHz,  $\text{CDCl}_3$ )  $\delta$  171.14, 75.42, 60.86, 37.46, 29.79, 25.89, 25.68, 21.11. HRMS (ESI) calcd for  $\text{C}_{10}\text{H}_{17}\text{NNaO}$   $[\text{M} + \text{H}]^+$  190.1202, found 190.1201.

### 4. Spectral data of compound **5**

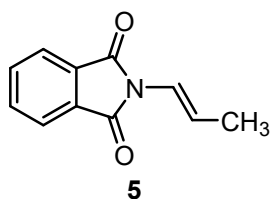

### (E)-2-(Prop-1-en-1-yl)isoindoline-1,3-dione (**5**)

Following the general procedure **e**, **5** was purified by silica gel chromatography (10% EtOAc/PE). Yield: 77%, brown solid, mp. 144–146 °C.<sup>[27]</sup>  $^1\text{H}$  NMR (400 MHz,  $\text{DMSO}-d_6$ )  $\delta$  7.89 – 7.80 (m, 4H), 6.52 (dq,  $J = 14.6, 1.5$  Hz, 1H), 6.40 (dq,  $J = 14.6, 6.6$  Hz, 1H), 1.78 (dd,  $J = 6.6, 1.6$  Hz, 3H).  $^{13}\text{C}$  NMR (100 MHz,  $\text{DMSO}-d_6$ )  $\delta$  166.77, 135.19, 131.67, 123.74, 119.09, 117.35, 16.35. HRMS (ESI) calcd for  $\text{C}_{11}\text{H}_{10}\text{NO}_2$   $[\text{M} + \text{H}]^+$  188.0706, found 188.0707.

## 5. Spectral data of compound **10**

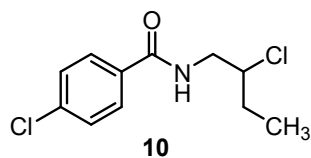

### 4-Chloro-*N*-(2-chlorobutyl)benzamide (**10**)

Following the general procedure **f**, **10** was purified by silica gel chromatography (15% EtOAc/PE). Yield: 25%, colorless solid, mp. 114–116 °C. <sup>1</sup>H NMR (400 MHz, CDCl<sub>3</sub>) δ 7.73 (d, *J* = 8.5 Hz, 2H), 7.43 (d, *J* = 8.5 Hz, 2H), 6.51 (brs, 1H), 4.04 (dddt, *J* = 24.2, 14.2, 6.9, 3.3 Hz, 2H), 3.46 (ddd, *J* = 14.2, 8.3, 5.0 Hz, 1H), 1.89 (ddd, *J* = 14.5, 7.3, 4.7 Hz, 2H), 1.09 (t, *J* = 7.3 Hz, 3H). <sup>13</sup>C NMR (100 MHz, CDCl<sub>3</sub>) δ 166.47, 138.02, 132.53, 128.96, 128.43, 64.83, 45.92, 29.11, 10.94. HRMS (ESI) calcd for C<sub>11</sub>H<sub>13</sub>ClNO [M + H]<sup>+</sup> 210.0680, found 210.0685.

## 6. Spectral data of compound **11**

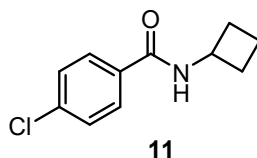

### 4-Chloro-*N*-cyclobutylbenzamide (**11**)

Following the general procedure **a**, **11** was purified by silica gel chromatography (20% EtOAc/PE). Yield: 84%, colorless solid, mp. 153-154 °C. <sup>1</sup>H NMR (400 MHz, CDCl<sub>3</sub>) δ 7.69 (d, *J* = 8.4 Hz, 2H), 7.39 (d, *J* = 8.3 Hz, 2H), 6.25 (s, 1H), 4.57 (h, *J* = 8.1 Hz, 1H), 2.48 – 2.37 (m, 2H), 1.96 (tt, *J* = 12.0, 9.2 Hz, 2H), 1.76 (ddt, *J* = 13.9, 8.8, 5.6 Hz, 2H). <sup>13</sup>C NMR (100 MHz, CDCl<sub>3</sub>) δ 165.49, 137.61, 132.96, 128.79, 128.34, 45.28, 31.32, 15.20. HRMS (ESI) calcd for C<sub>11</sub>H<sub>13</sub>ClNO [M + H]<sup>+</sup> 210.0680, found 210.0677.

## 7. Spectral data of compounds **13** and **14**

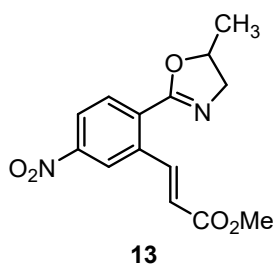

### Methyl (*E*)-3-(2-(5-methyl-4,5-dihydrooxazol-2-yl)-5-nitrophenyl)acrylate (**13**)

Following the general procedure **g**, **13** was purified by silica gel chromatography (25% EtOAc/PE). Yield: 60% with 10% of **14**, light purple solid, mp. 132–133 °C. <sup>1</sup>H NMR (400 MHz, CDCl<sub>3</sub>) δ 8.56 (d, *J* = 16.0 Hz, 1H), 8.45 (d, *J* = 2.3 Hz, 1H), 8.22 (dd, *J* = 8.7, 2.3 Hz, 1H), 8.07 (dd, *J* = 8.6, 2.0 Hz, 1H), 6.48 (d, *J* = 16.0 Hz, 1H), 4.91 (ddt, *J* = 9.5, 7.7, 6.1 Hz, 1H), 4.26 (dd, *J* = 15.1, 9.5 Hz, 1H), 3.83 (s, 3H), 3.74 (dd, *J* = 15.1, 7.5 Hz, 1H), 1.47 (d, *J* = 6.2 Hz, 3H). <sup>13</sup>C NMR (100 MHz, CDCl<sub>3</sub>) δ 166.60, 161.65, 148.99, 141.96, 136.88, 132.91, 131.51, 123.59, 122.31, 122.24, 76.82, 62.36, 52.02, 21.09. HRMS (ESI) calcd for C<sub>14</sub>H<sub>14</sub>N<sub>2</sub>NaO<sub>5</sub> [M + H]<sup>+</sup> 313.0795, found 313.0796.

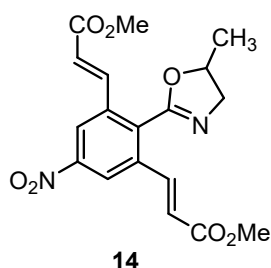

### Dimethyl 3,3'-(2-(5-methyl-4,5-dihydrooxazol-2-yl)-5-nitro-1,3-phenylene)(2*E*,2'*E*)-diacrylate (**14**)

Following the general procedure **g**, **14** was purified by silica gel chromatography (25% EtOAc/PE). Yield: 52%, light purple solid, mp. 146–147 °C. <sup>1</sup>H NMR (400 MHz, CDCl<sub>3</sub>) δ 8.46 (s, 2H), 7.84 (d, *J* = 15.9 Hz, 2H), 6.55 (d, *J* = 15.9 Hz, 2H), 5.11 – 4.97 (m, 1H), 4.33 (t, *J* = 12.2 Hz, 1H), 3.83 (s, 6H), 1.56 (d, *J* = 6.2 Hz, 3H). <sup>13</sup>C NMR (100 MHz, CDCl<sub>3</sub>) δ 166.17, 159.91, 148.82, 139.50, 137.02, 134.95, 123.36, 121.68, 77.77, 62.26, 52.15, 21.28. HRMS (ESI) calcd for C<sub>18</sub>H<sub>18</sub>N<sub>2</sub>NaO<sub>7</sub> [M + H]<sup>+</sup> 397.1006, found 397.1005.

### 8. Spectral data of compound **15**

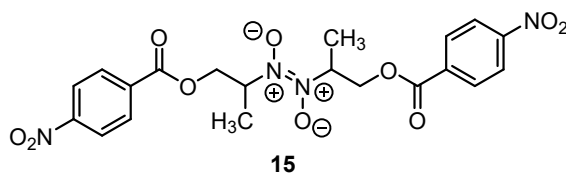

### (*E*)-1,2-Bis(1-((4-nitrobenzoyl)oxy)propan-2-yl)diazene 1,2-dioxide (**15**)

Following the general procedure **h**, **15** was purified by silica gel chromatography

(25% EtOAc/PE). Yield: 50%, colorless solid, mp. 149–151 °C.  $^1\text{H}$  NMR (400 MHz,  $\text{CDCl}_3$ )  $\delta$  8.25 (d,  $J$  = 8.5 Hz, 2H), 8.14 (d,  $J$  = 8.7 Hz, 2H), 5.78–5.68 (m, 1H), 4.54 (d,  $J$  = 5.9 Hz, 2H), 1.47 (d,  $J$  = 6.5 Hz, 3H).  $^{13}\text{C}$  NMR (100 MHz,  $\text{CDCl}_3$ )  $\delta$  163.89, 150.61, 135.15, 130.86, 123.56, 67.36, 62.80, 17.86. HRMS (ESI) calcd for  $\text{C}_{20}\text{H}_{21}\text{N}_4\text{O}_{10}$   $[\text{M} + \text{H}]^+$  477.1252, found 477.1250.

## X. References

- [S1] M.-M. Wang, T. V. T. Nguyen, and J. Waser, *J. Am. Chem. Soc.*, 2021, **143**, 11969.
- [S2] M.-M. Wang and J. Waser, *Angew. Chem. Int. Ed.*, 2019, **58**, 13880.
- [S3] M. Takeshi, K. Tomoaki, S. Ryota, I. Hirofumi, Y. Seiji, O. Takehiko, H. Mitsuru, F. Hiroki and I. Yutaka, EP1790641, 2007.
- [S4] P. Sureshbabu, A. Sadaf, P. Chaudhary and J. Kandasamy, *Org. Biomol. Chem.*, 2019, **17**, 845.
- [S5] Y. Zhang, B. Liu, Z. Gou, Y. Li, X. Zhang, Y. Wang, S. Yu, Y. Li, and D. Sun, *Bioorg. Med. Chem. Lett.*, 2015, **25**, 791.
- [S6] P. Baburajan, and K. P. Elango, *Tetrahedron Lett.*, 2014, **55**, 1006.
- [S7] V. C. Agwada, *J. Chem. Eng. Data* 1984, **29**, 231.
- [S8] P. P. Onys'ko, D. V. Klyukovskii and A. V. Bezdudnyi, *Russ. J. Gen. Chem.*, 2015, **85**, 418.
- [S9] H. Kondo, K. Itami and J. Yamaguchi, *Chem. Sci.*, 2017, **8**, 3799.
- [S10] S. Mkrtchyan, M. Jakubczyk, S. Lanka, M. Pittelkow and V. O. Iaroshenko, *Molecules*, 2021, **26**, 2957.
- [S11] F. Muth, M. Gunther, S. M. Bauer, E. Doring, S. Fischer, J. Maier, P. Druckes, J. Koppler, J. Trappe, U. Rothbauer, P. Koch, and S. A. Laufer, *J. Med. Chem.*, 2015, **58**, 443.
- [S12] J.-Q. Zhang, D. Hu, J. Wang, B. Ni and H. Ren, Bimetallic Metal–Organic Coordination Polymers Facilitated the Selective C–F Cleavage of Polyfluoroarenes. *Org. Lett.*, 2022, **24**, 7905.
- [S13] S. Singh, S. Popuri, Q. M. Junaid, S. Sabiah and J. J. Kandasamy, *Org. Biomol. Chem.*, 2021, **19**, 7134.
- [S14] J. K. Vandavasi, C.-T. Hsiao, W.-P. Hu, S. S. K. Boominathan, and J.-J. Wang, *Eur. J. Org. Chem.*, 2015, **14**, 3171.
- [S15] S. Miyamura, M. Araki, T. Suzuki, J. Yamaguchi and K. Itami. *Angew. Chem. Int. Ed.*, 2015, **54**, 846.
- [S16] S. Benard, L. Neuville and J. Zhu, *J. Org. Chem.*, 2008, **73**, 6441.

- [S17] R. Shen, C. T. Lin, E. J. Bowman, B. J. Bowman and J. A. Porco Jr., *J. Am. Chem. Soc.*, 2003, **125**, 7889.
- [S18] B. Wu, J. R. Parquette and T. V. RajanBabu, *Science*, 2009, **326**, 1662.
- [S19] F. W. Gubitz, Aromatic substituted amidines. US3850909, 1974.
- [S20] B. Li, K. Devaraj, C. Darcel and P. H. Dixneuf, *Green Chem.*, 2012, **14**, 2706.
- [21] S. Perrone, T. Pilati, F. Rosato, A. Salomone, V. Videtta and L. Troisi, *Tetrahedron*, 2011, **67**, 2090.
- [22] G. S. Kumar, M. Venkateshwar and U. Maheswari. *RSC Adv.* 2014, **4**, 39897.
- [23] R. Kuwano, N. Kameyama, and R. Ikeda, *J. Am. Chem. Soc.*, 2011, **133**, 19, 7312.
- [24] G.-Q. Liu, C.-H. Yang, and Y.-M. Li, *J. Org. Chem.*, 2015, **80**, 11339.
- [25] R. Zhao, M. Yan, R. Zhang, Y. Ma, and J. Chen, *ChemistrySelect*, 2019, **4**, 10907.
- [26] A. Martin, K. Casto, W. Morris and J. B. Morgan, *Org. Lett.*, 2011, **13**, 5444.
- [27] D. P. Ojha, K. Gadde and K. R. Prabhu, *J. Org. Chem.*, 2017, **82**, 4859.

## XI. 1D and 2D NMR Spectra

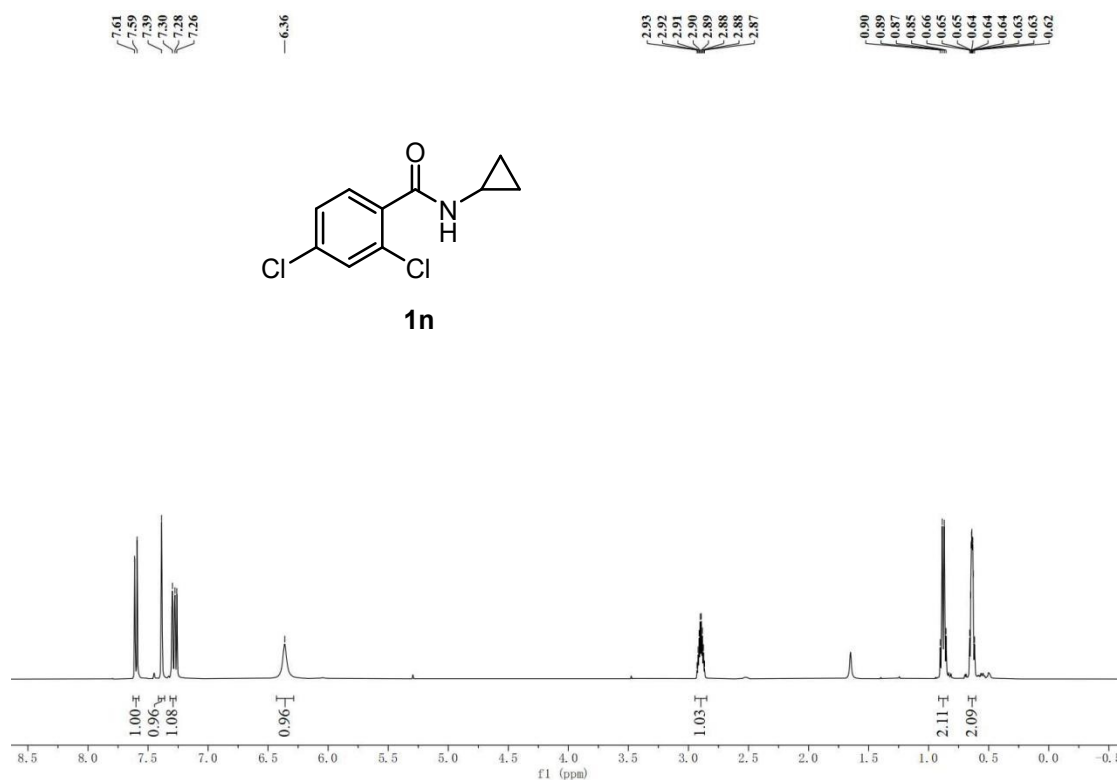

**Figure S1.**  $^1\text{H}$  NMR spectrum of **1n** in  $\text{CDCl}_3$  (400 MHz).

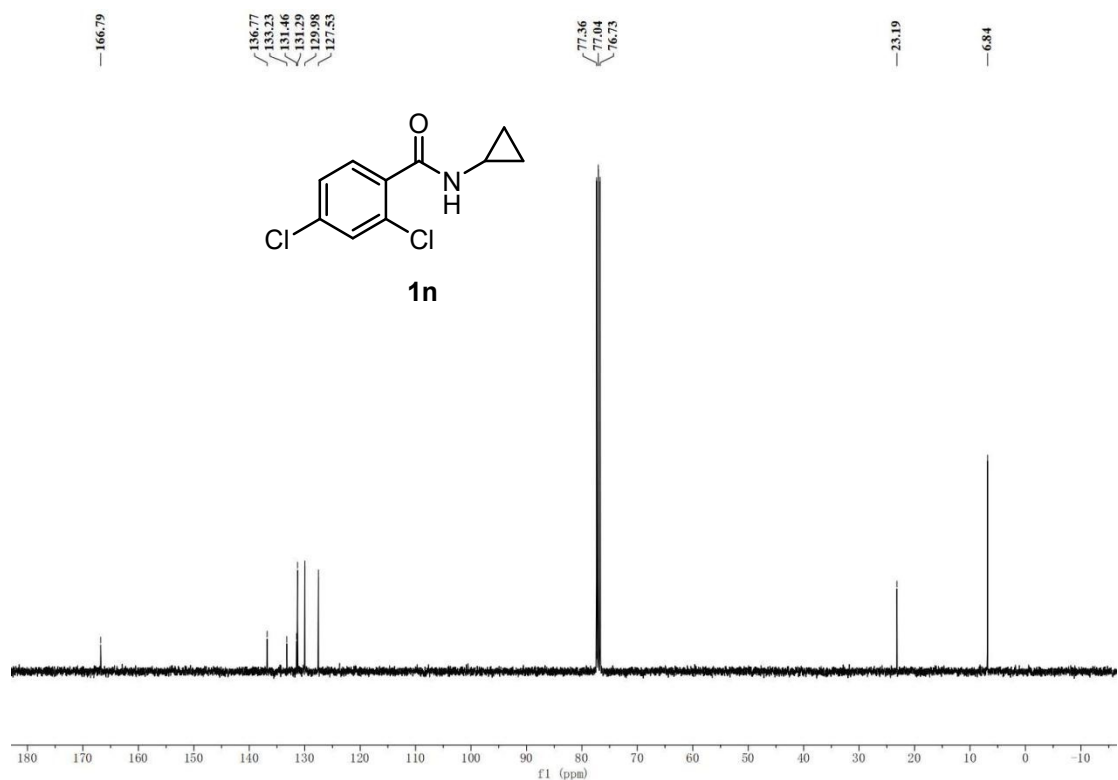

**Figure S2.**  $^{13}\text{C}$  NMR spectrum of **1n** in  $\text{CDCl}_3$  (100 MHz).



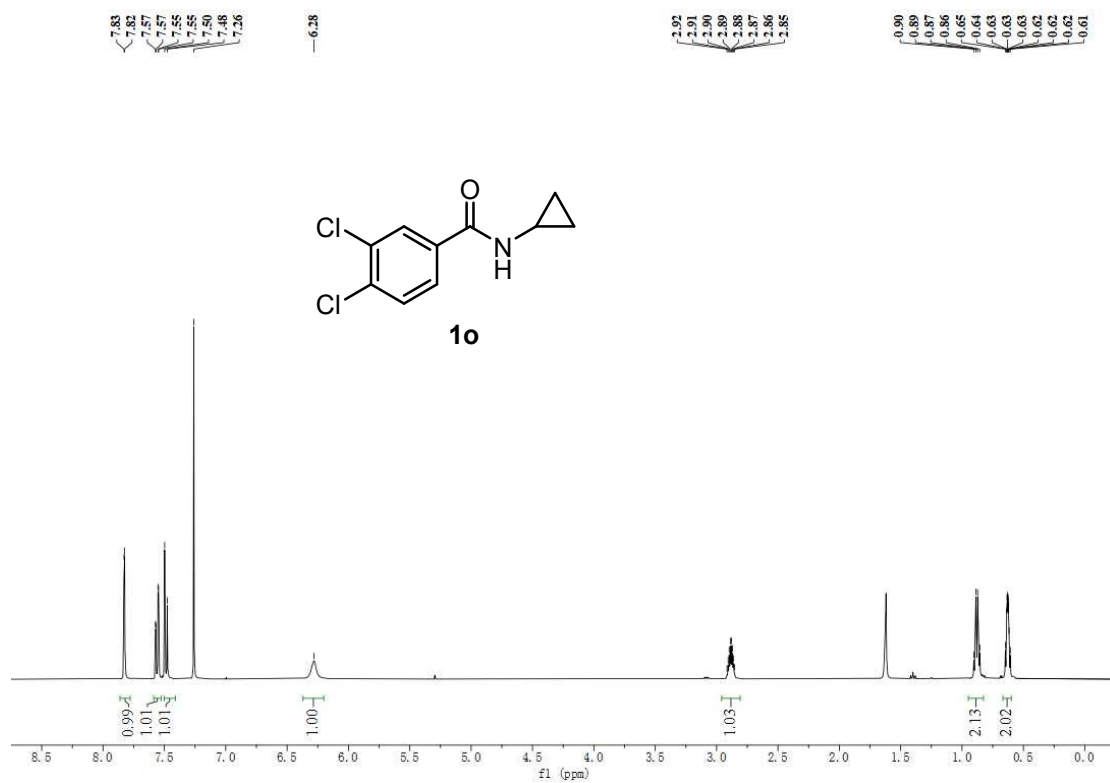

**Figure S3.** <sup>1</sup>H NMR spectrum of **1o** in CDCl<sub>3</sub> (400 MHz).

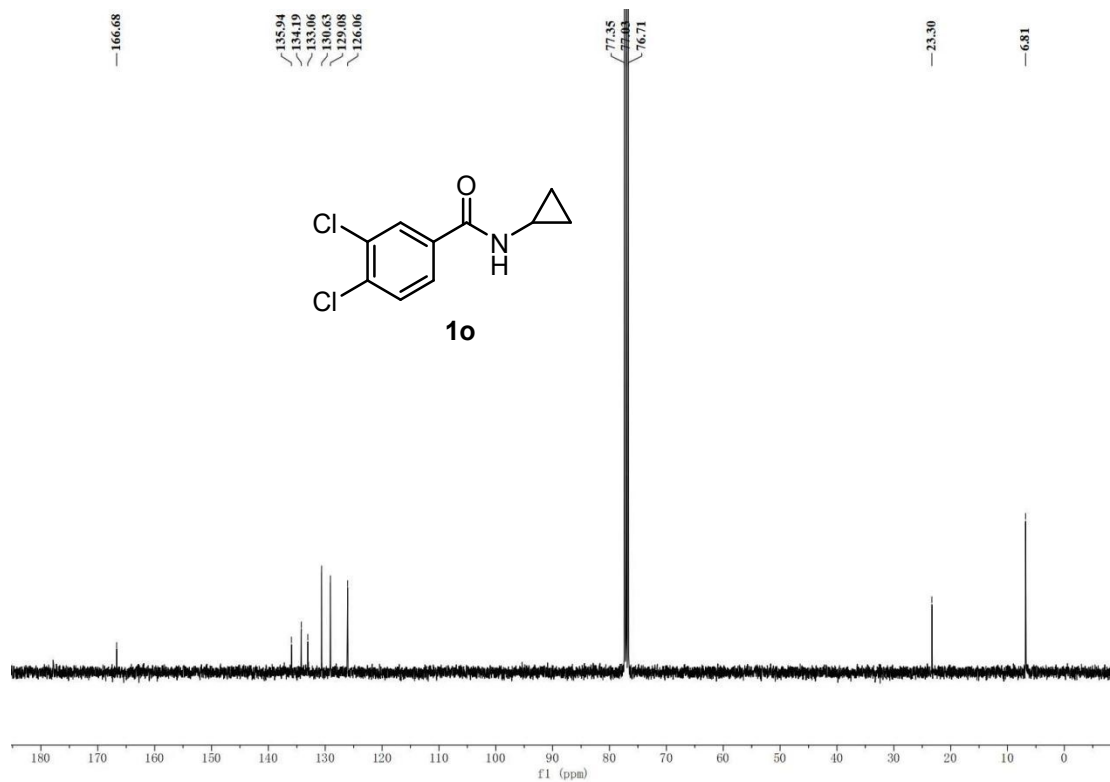

**Figure S4.** <sup>13</sup>C NMR spectrum of **1o** in CDCl<sub>3</sub> (100 MHz).

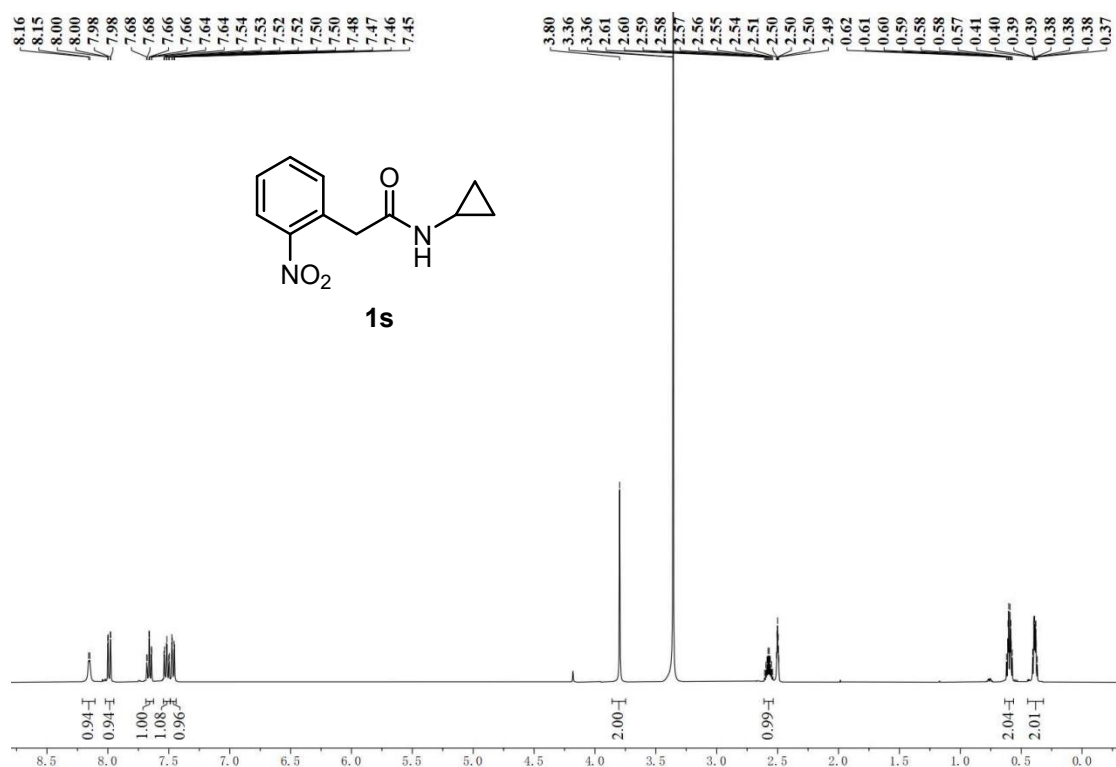

**Figure S5.** <sup>1</sup>H NMR spectrum of **1s** in DMSO-*d*<sub>6</sub> (400 MHz).

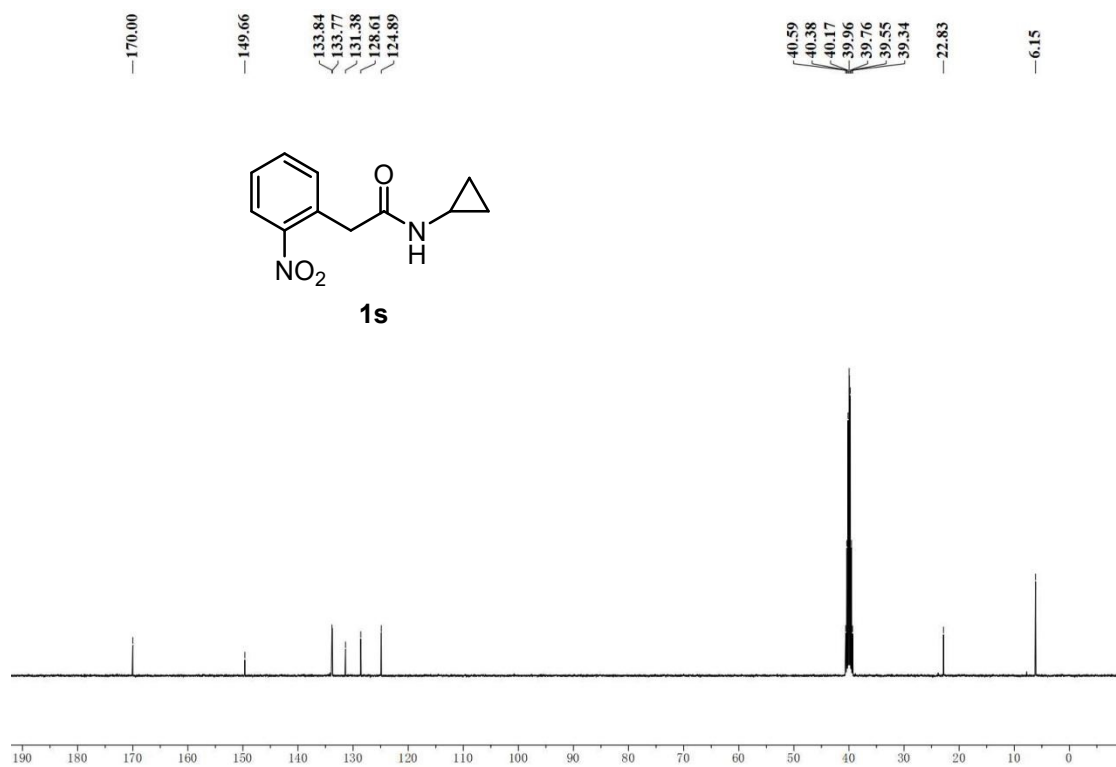

**Figure S6.** <sup>13</sup>C NMR spectrum of **1s** in DMSO-*d*<sub>6</sub> (100 MHz).

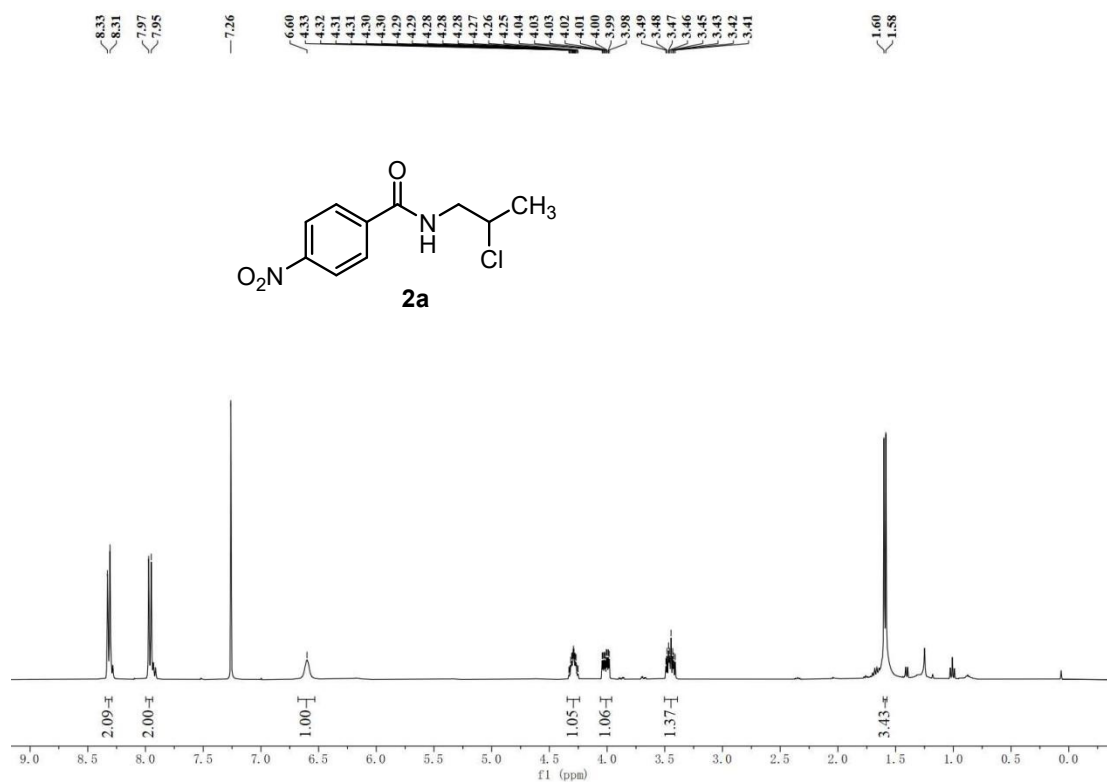

**Figure S7.** <sup>1</sup>H NMR spectrum of **2a** in CDCl<sub>3</sub> (400 MHz).

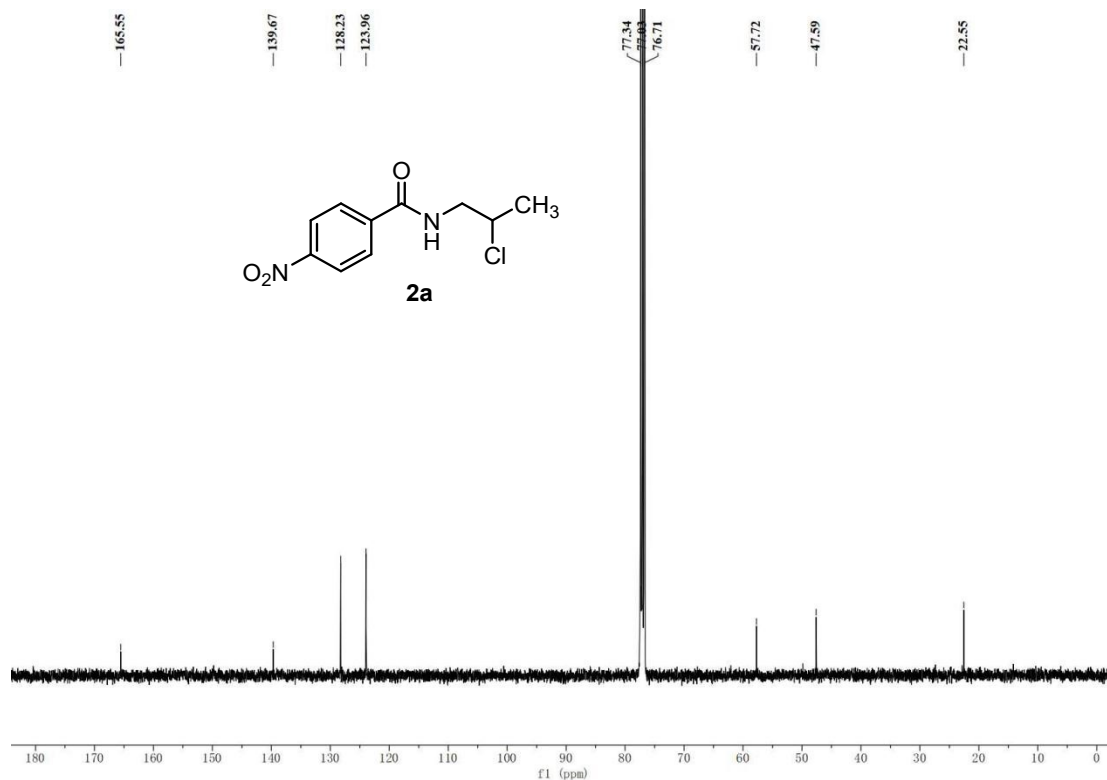

**Figure S8.** <sup>13</sup>C NMR spectrum of **2a** in CDCl<sub>3</sub> (100 MHz).

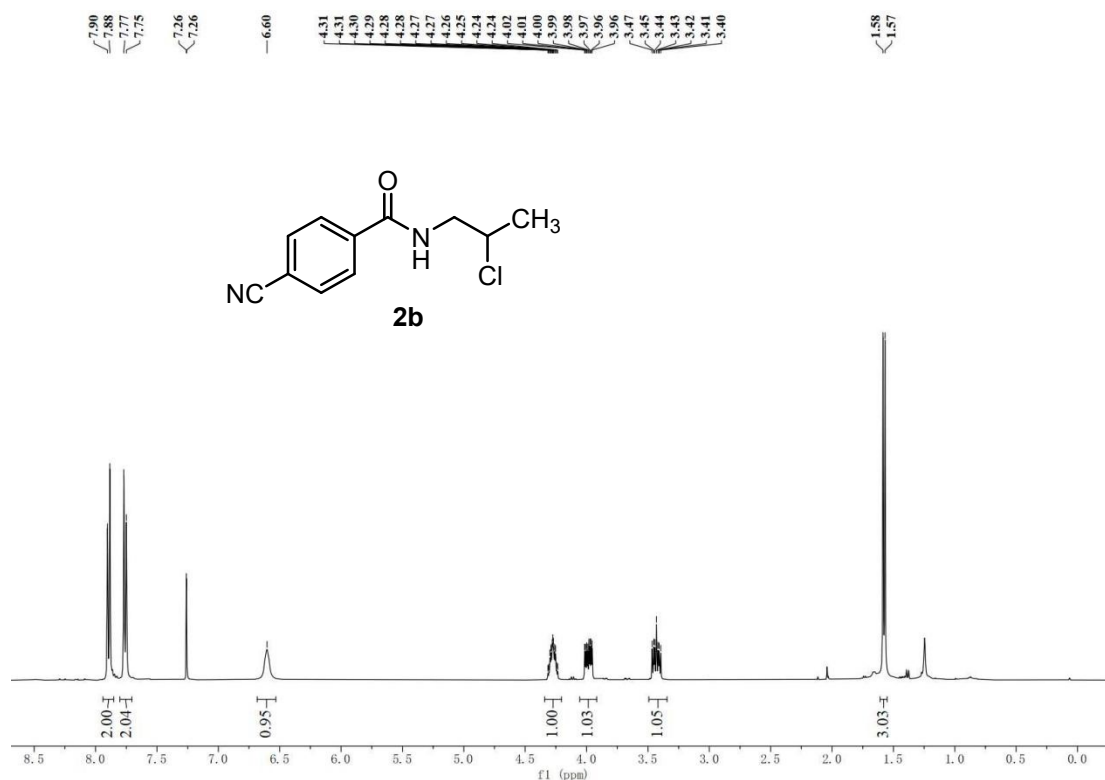

**Figure S9.** <sup>1</sup>H NMR spectrum of **2b** in CDCl<sub>3</sub> (400 MHz).

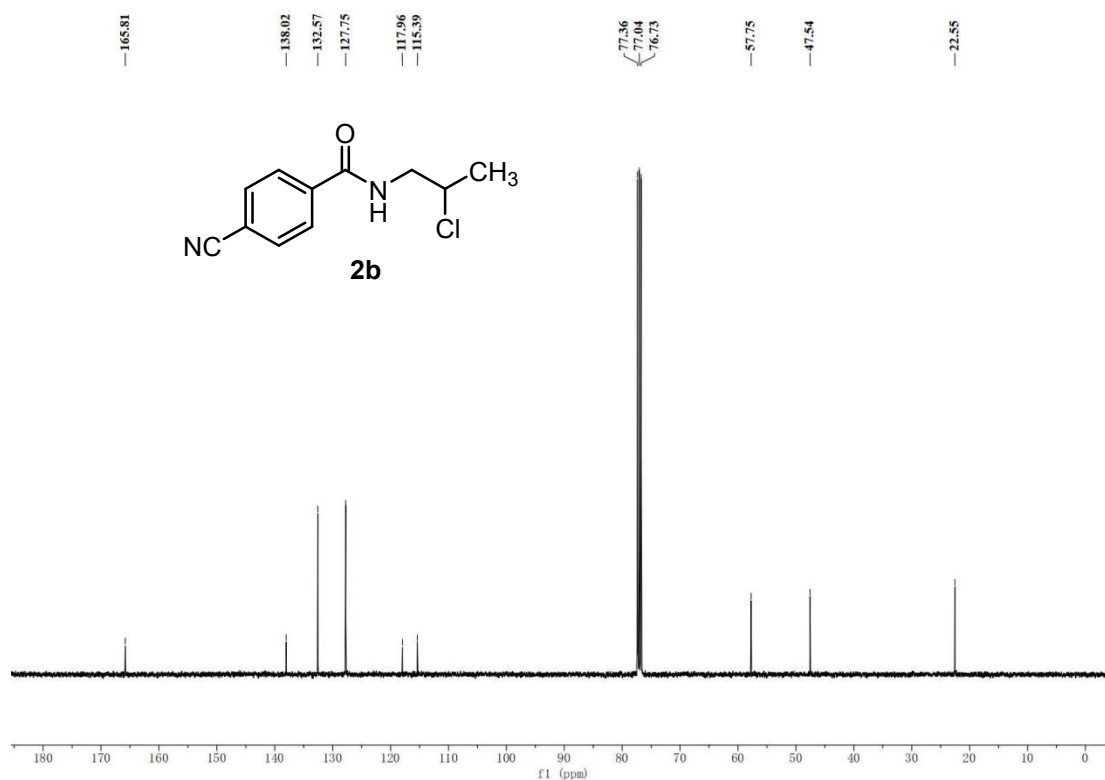

**Figure S10.** <sup>13</sup>C NMR spectrum of **2b** in CDCl<sub>3</sub> (100 MHz).

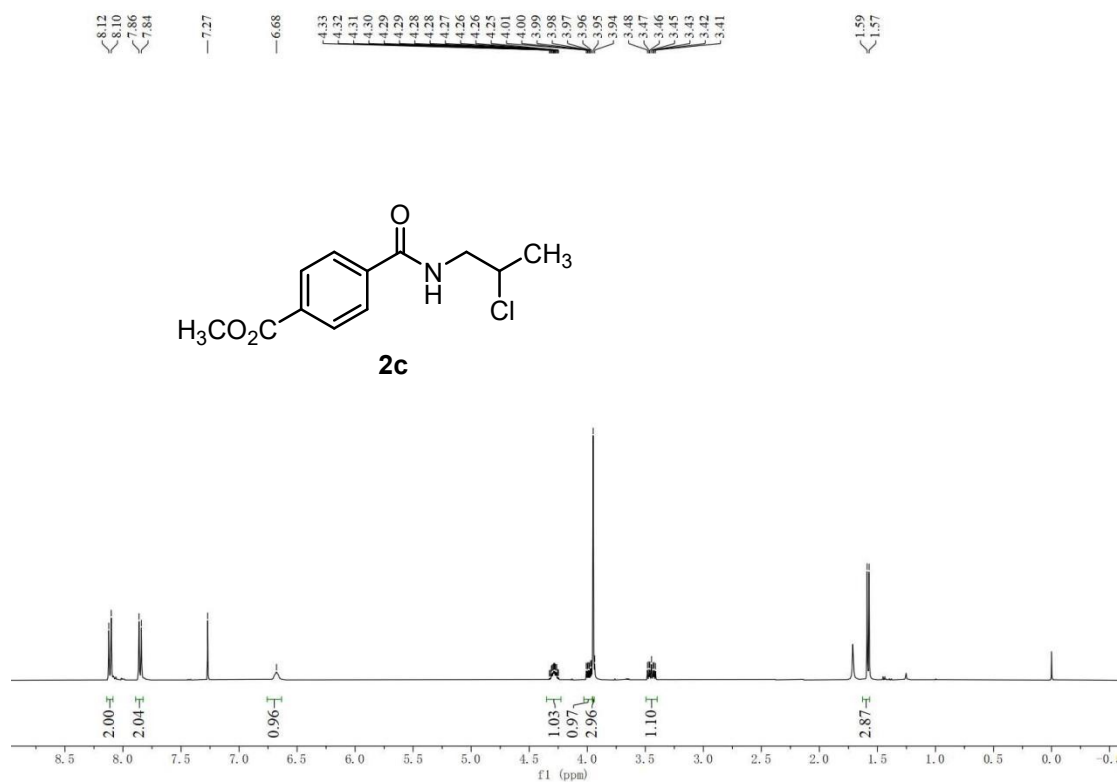

**Figure S11.** <sup>1</sup>H NMR spectrum of **2c** in CDCl<sub>3</sub> (400 MHz).

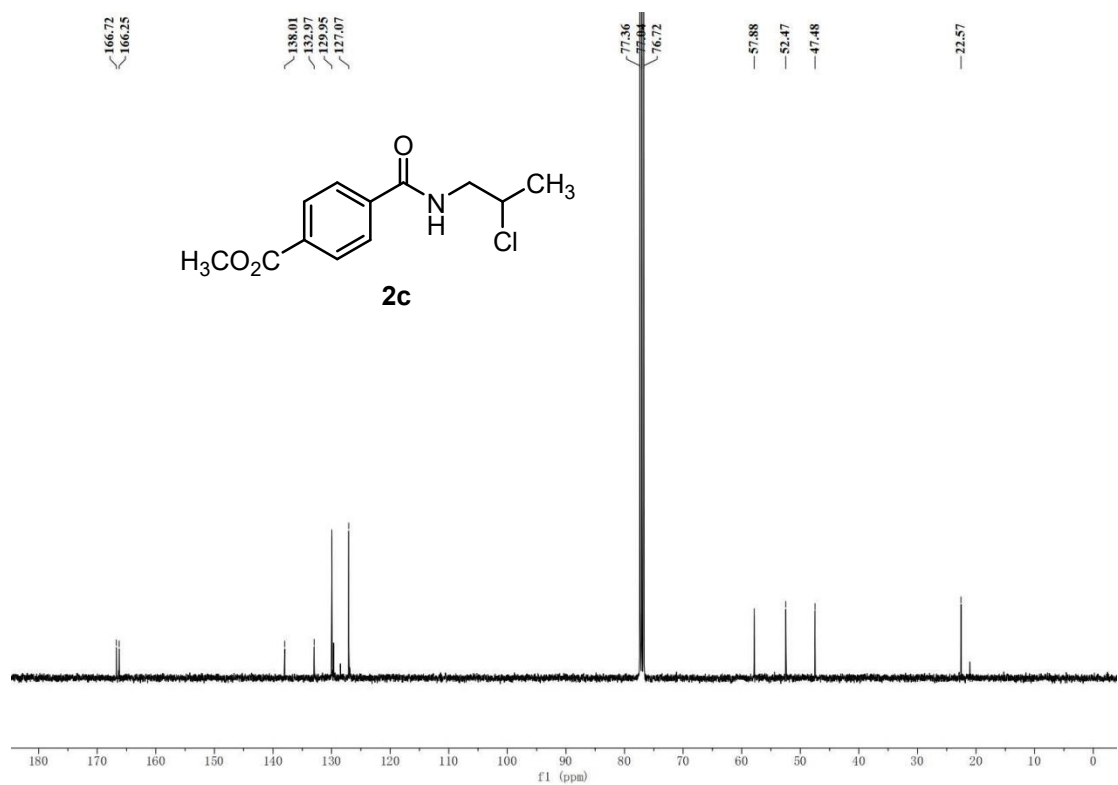

**Figure S12.** <sup>13</sup>C NMR spectrum of **2c** in CDCl<sub>3</sub> (100 MHz).

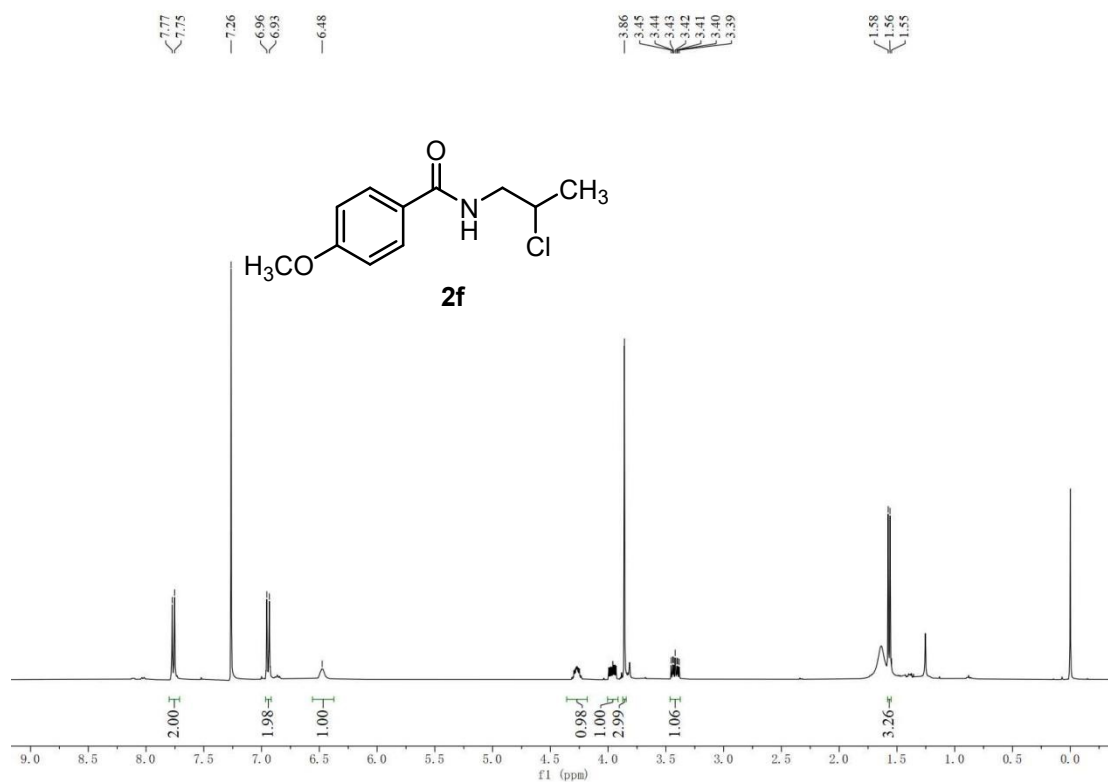

**Figure S13.** <sup>1</sup>H NMR spectrum of **2f** in CDCl<sub>3</sub> (400 MHz).

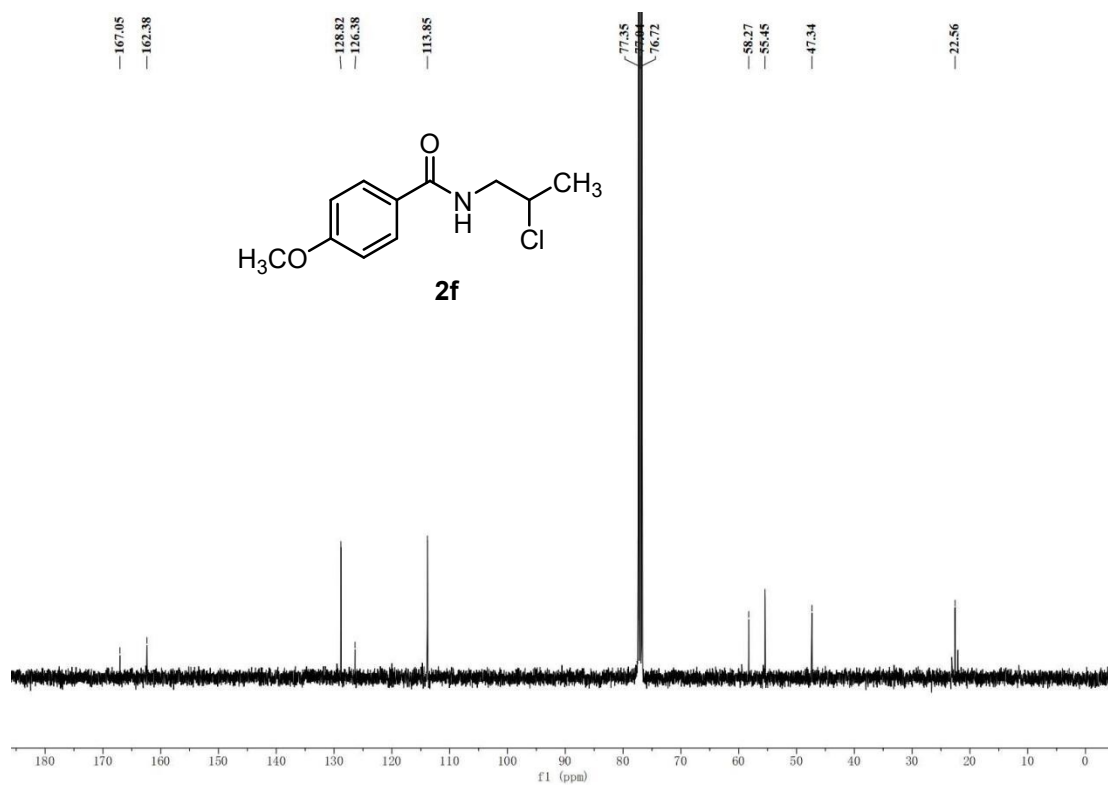

**Figure S14.** <sup>13</sup>C NMR spectrum of **2f** in CDCl<sub>3</sub> (100 MHz).

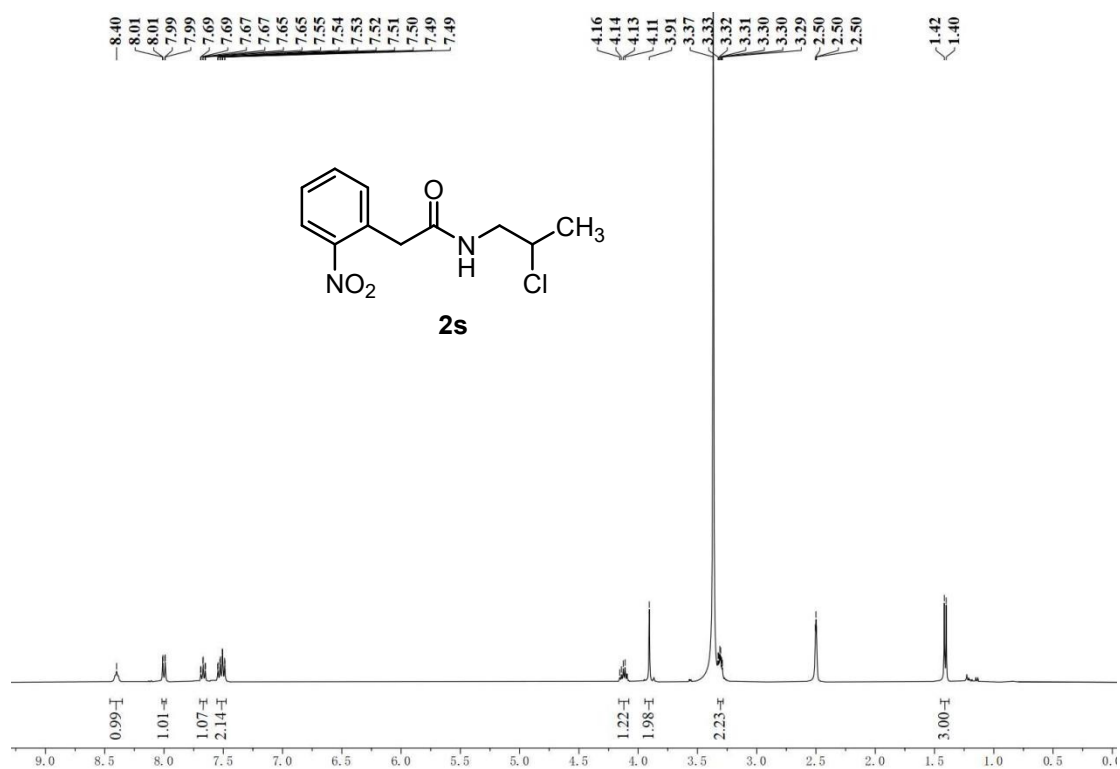

**Figure S15.** <sup>1</sup>H NMR spectrum of **2s** in DMSO-*d*<sub>6</sub> (400 MHz).

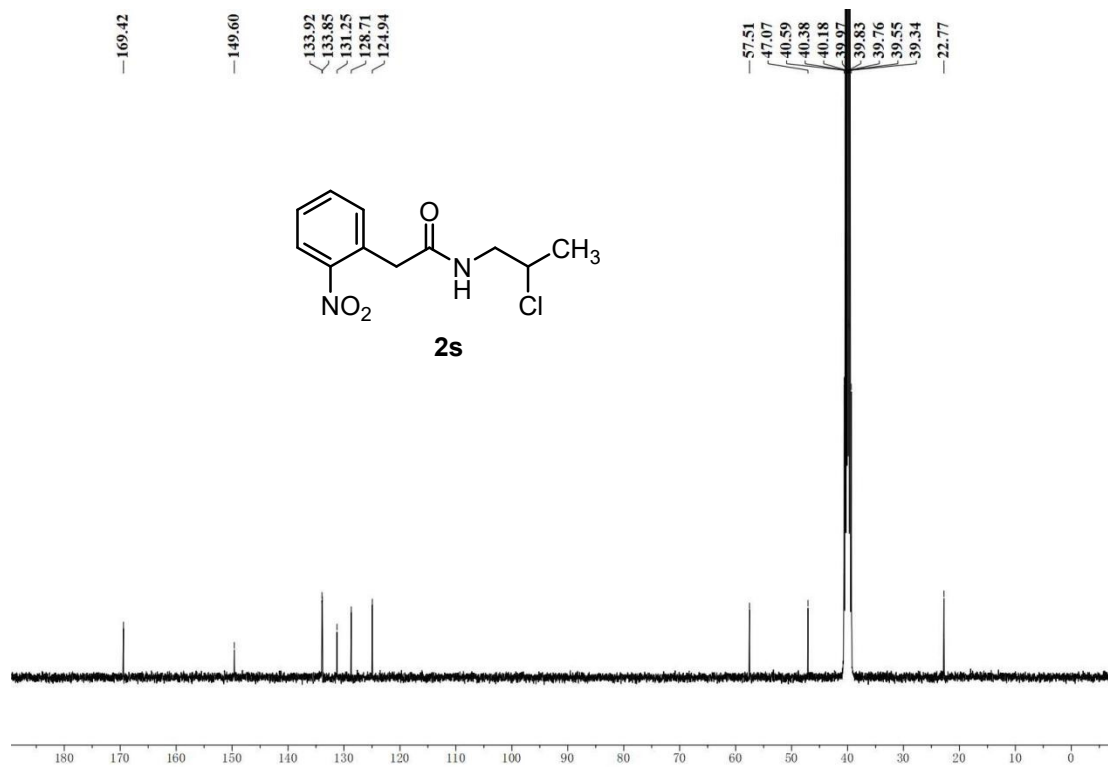

**Figure S16.** <sup>13</sup>C NMR spectrum of **2s** in DMSO-*d*<sub>6</sub> (100 MHz).

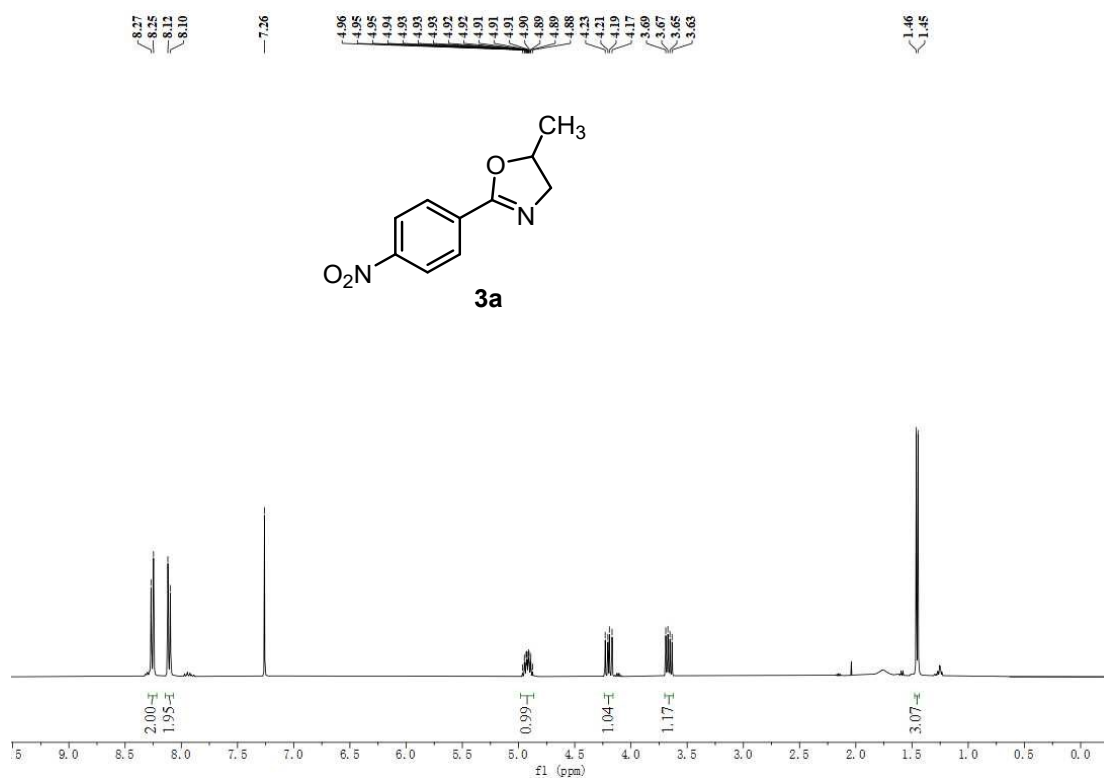

**Figure S17.** <sup>1</sup>H NMR spectrum of **3a** in CDCl<sub>3</sub> (400 MHz).

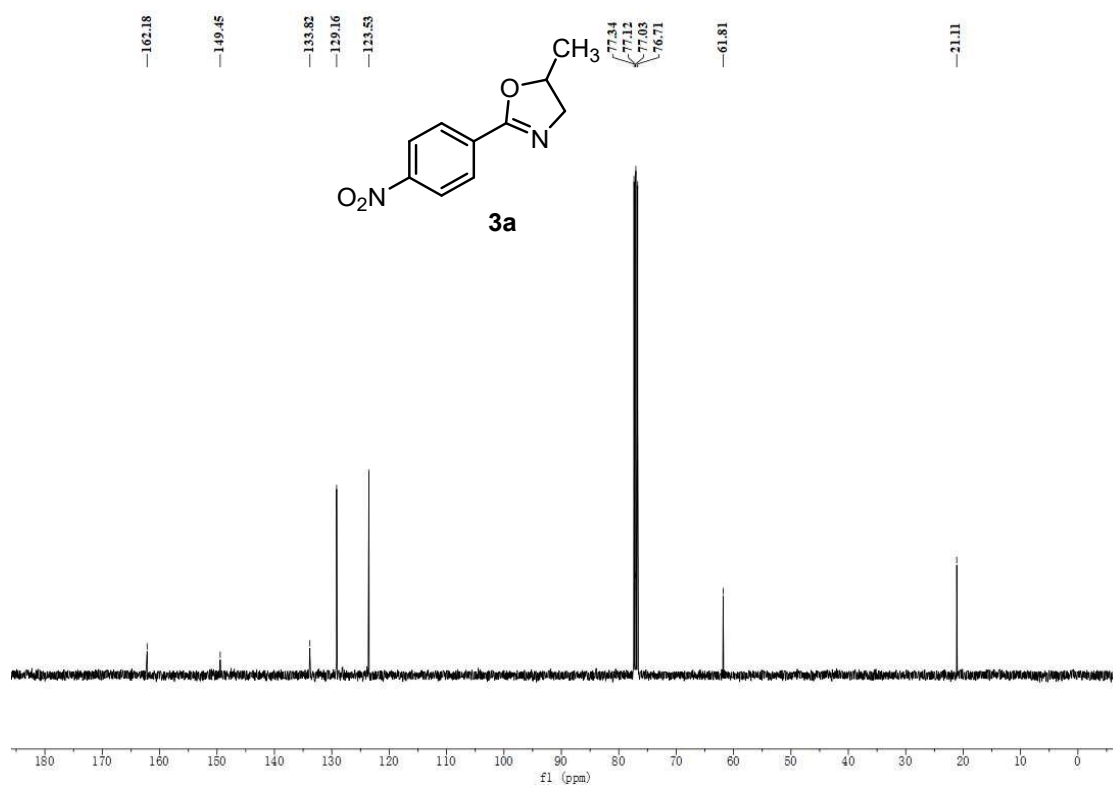

**Figure S18.** <sup>13</sup>C NMR spectrum of **3a** in CDCl<sub>3</sub> (100 MHz).



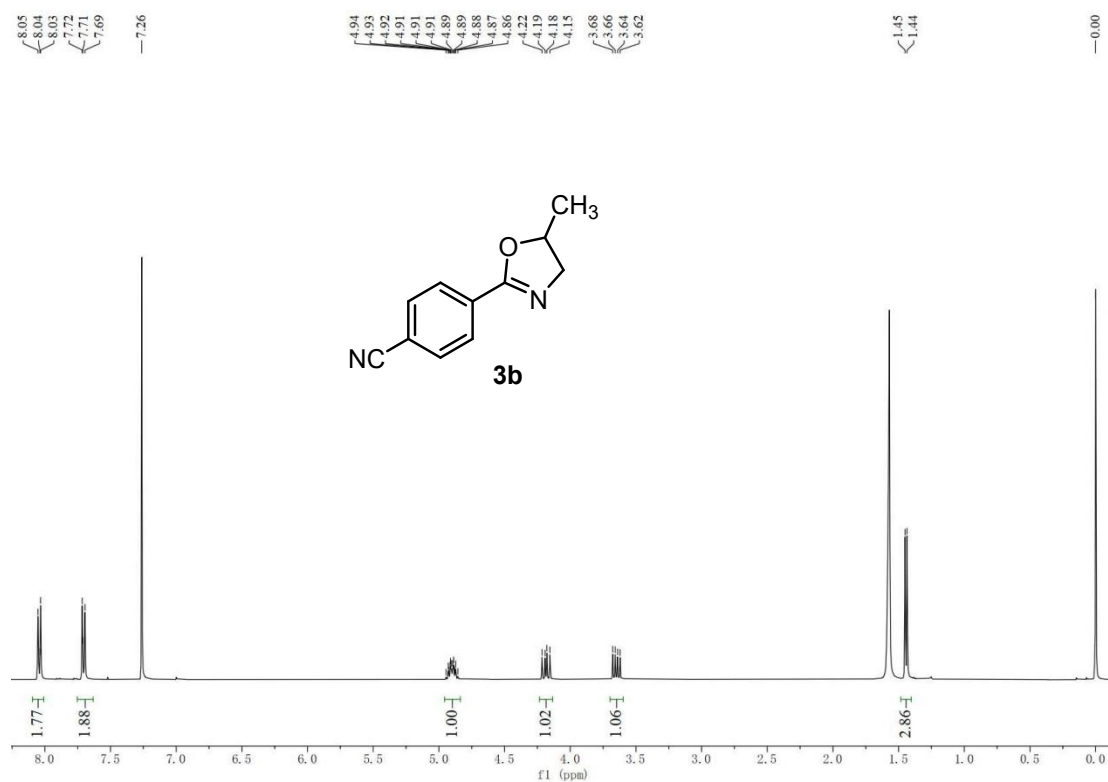

**Figure S19.** <sup>1</sup>H NMR spectrum of **3b** in CDCl<sub>3</sub> (400 MHz).

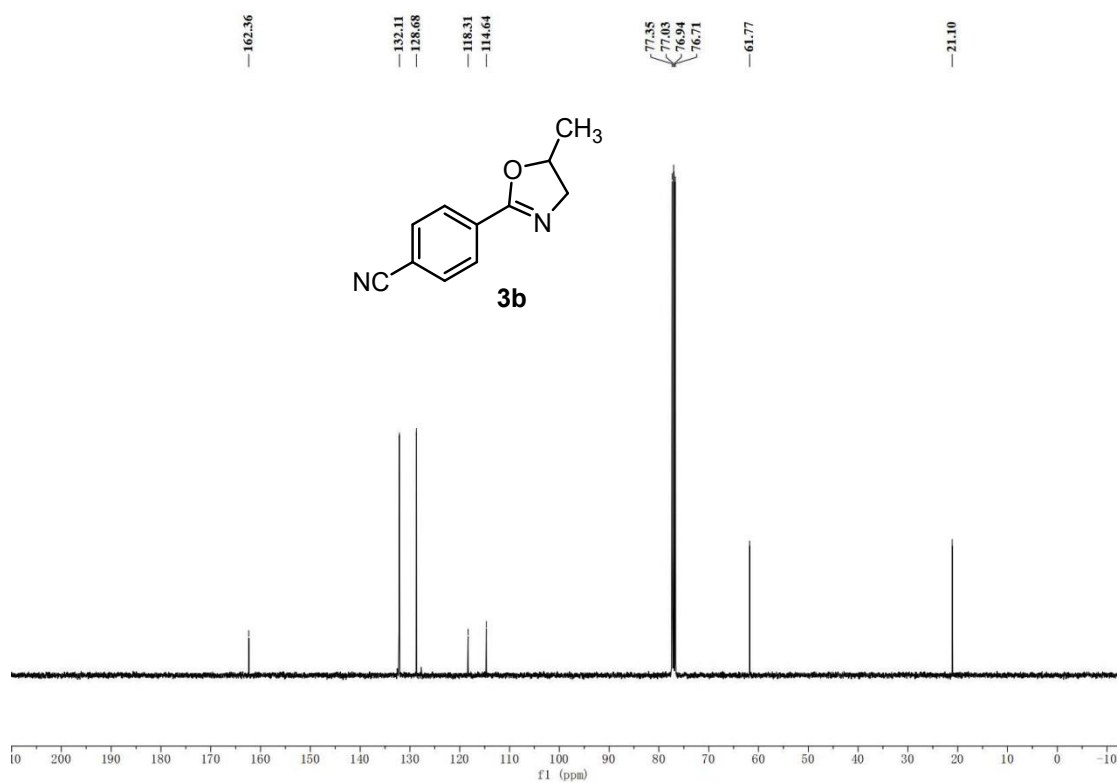

**Figure S20.** <sup>13</sup>C NMR spectrum of **3b** in CDCl<sub>3</sub> (100 MHz).

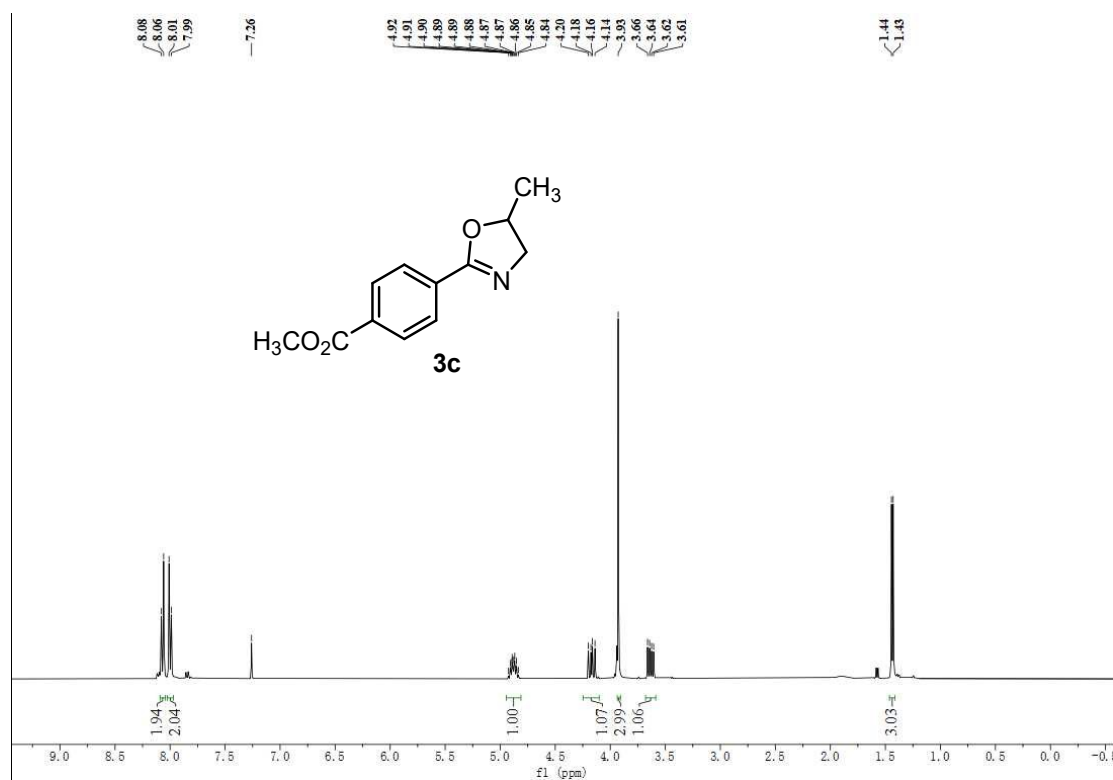

**Figure S21.** <sup>1</sup>H NMR spectrum of **3c** in CDCl<sub>3</sub> (400 MHz).

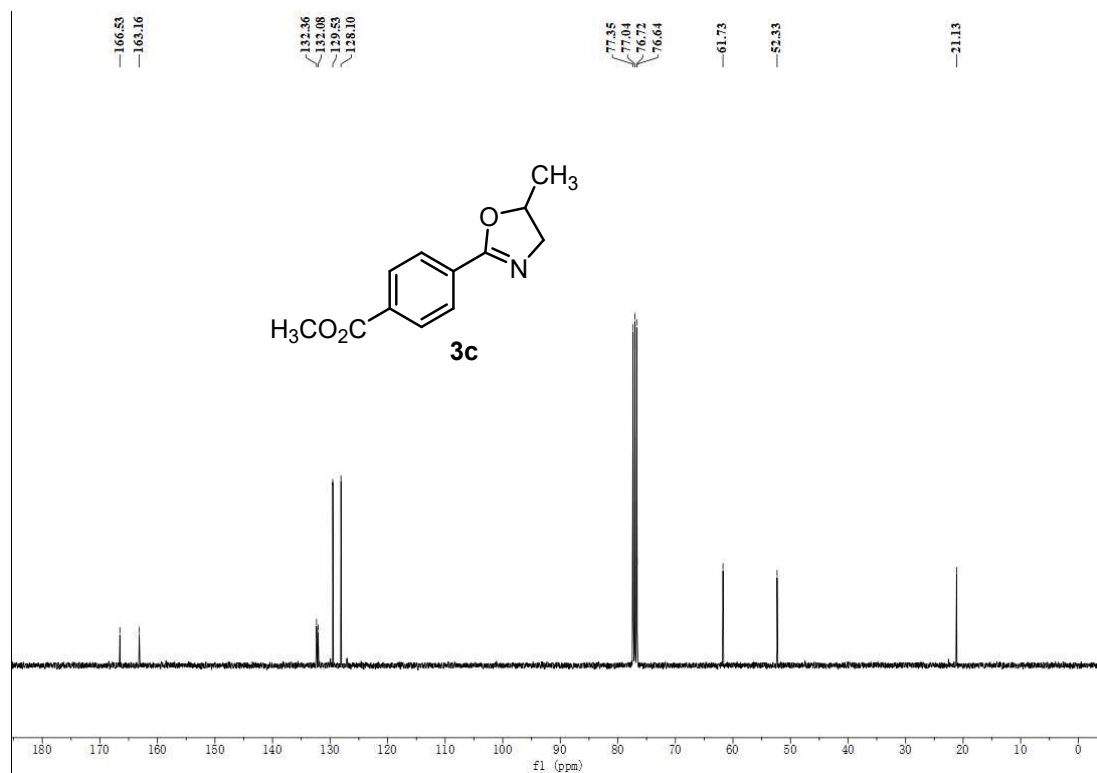

**Figure S22.** <sup>13</sup>C NMR spectrum of **3c** in CDCl<sub>3</sub> (100 MHz).

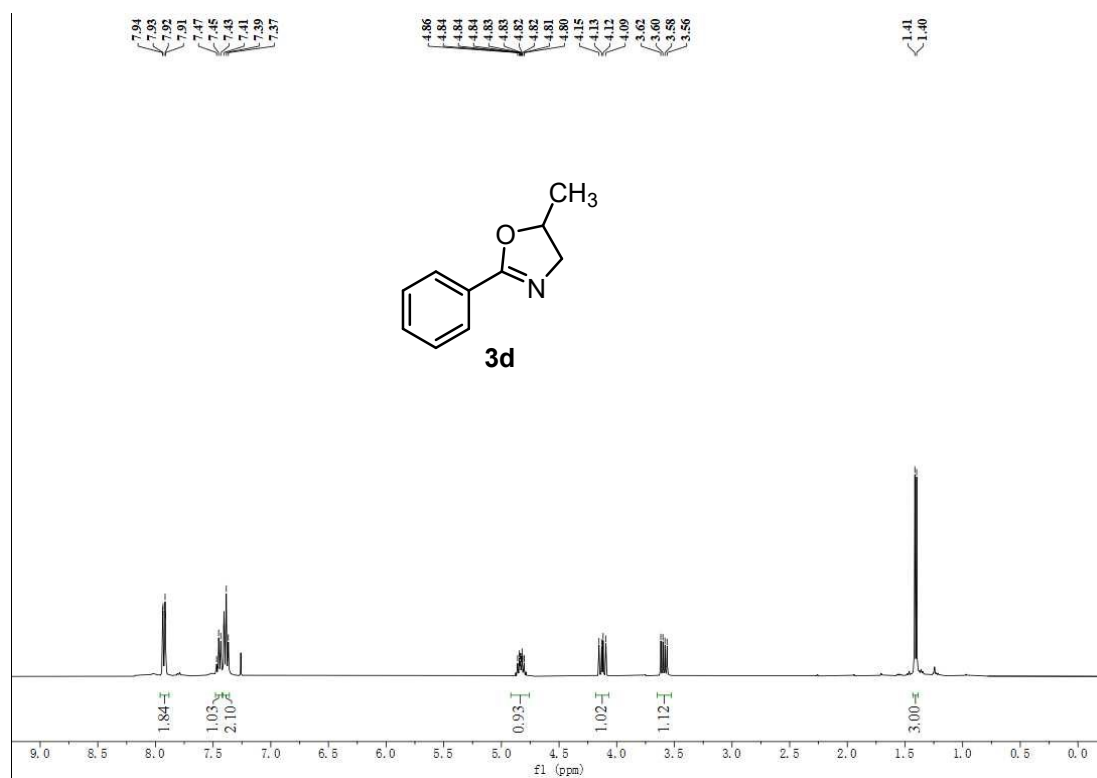

**Figure S23.** <sup>1</sup>H NMR spectrum of **3d** in CDCl<sub>3</sub> (400 MHz).

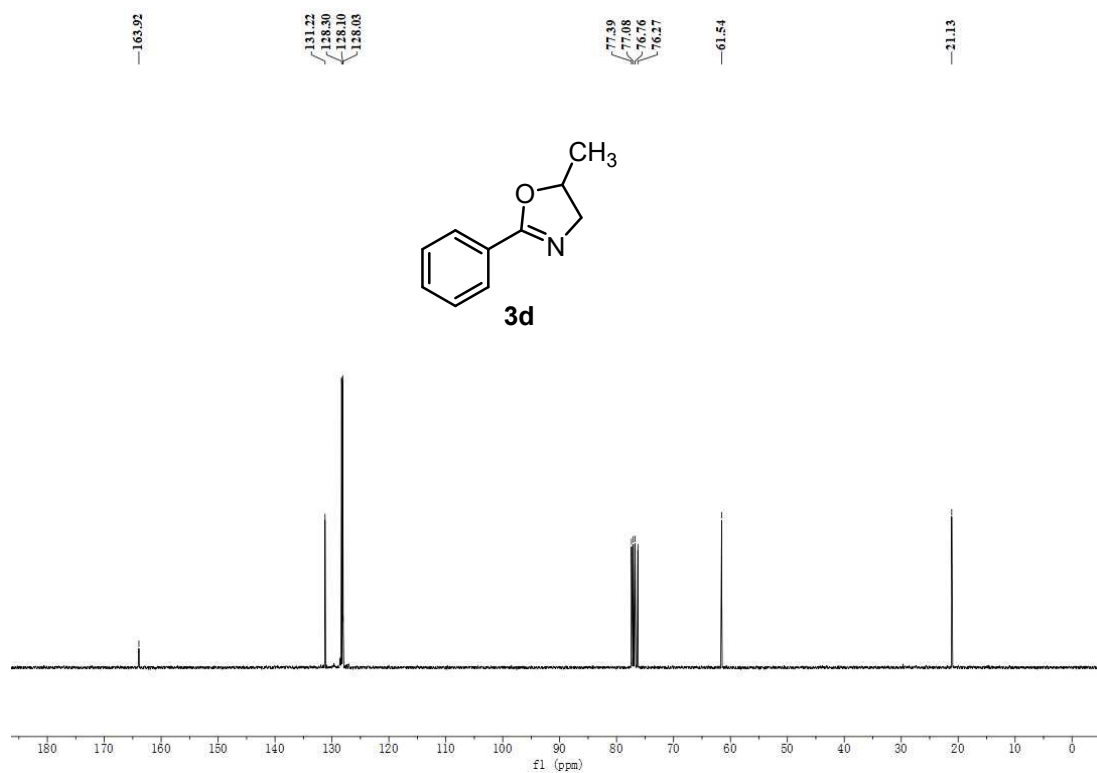

**Figure S24.** <sup>13</sup>C NMR spectrum of **3d** in CDCl<sub>3</sub> (100 MHz).

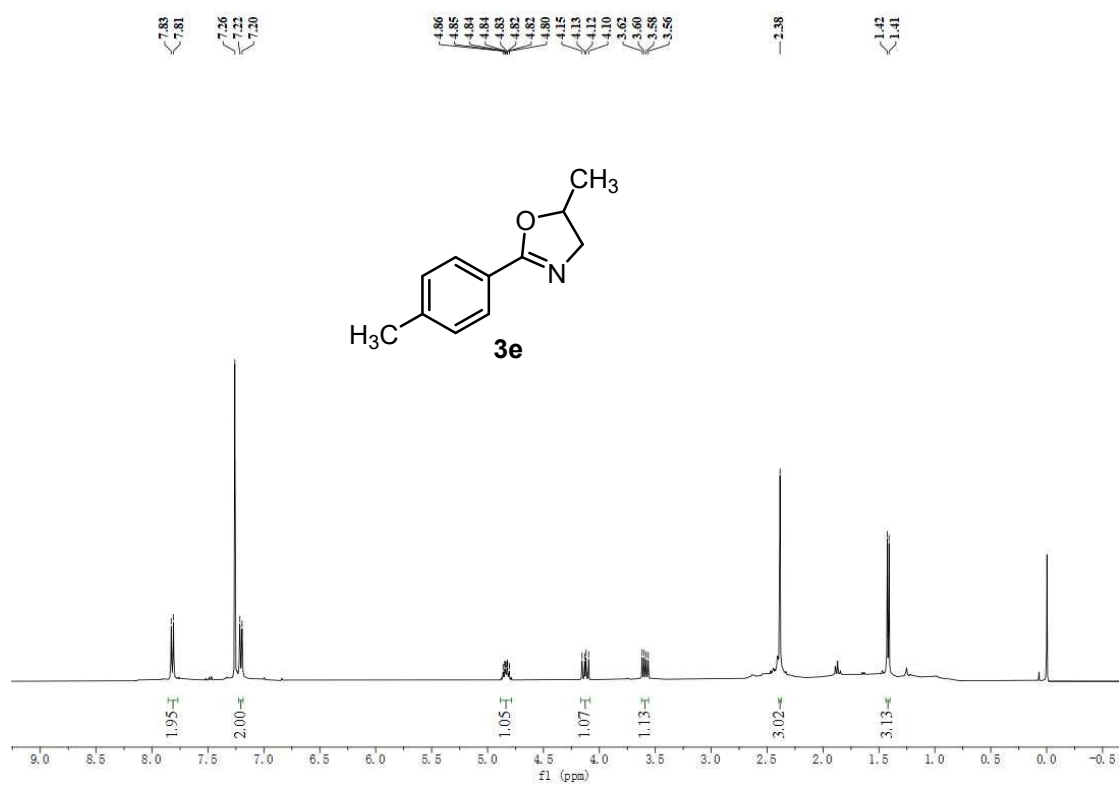

**Figure S25.** <sup>1</sup>H NMR spectrum of **3e** in CDCl<sub>3</sub> (400 MHz).

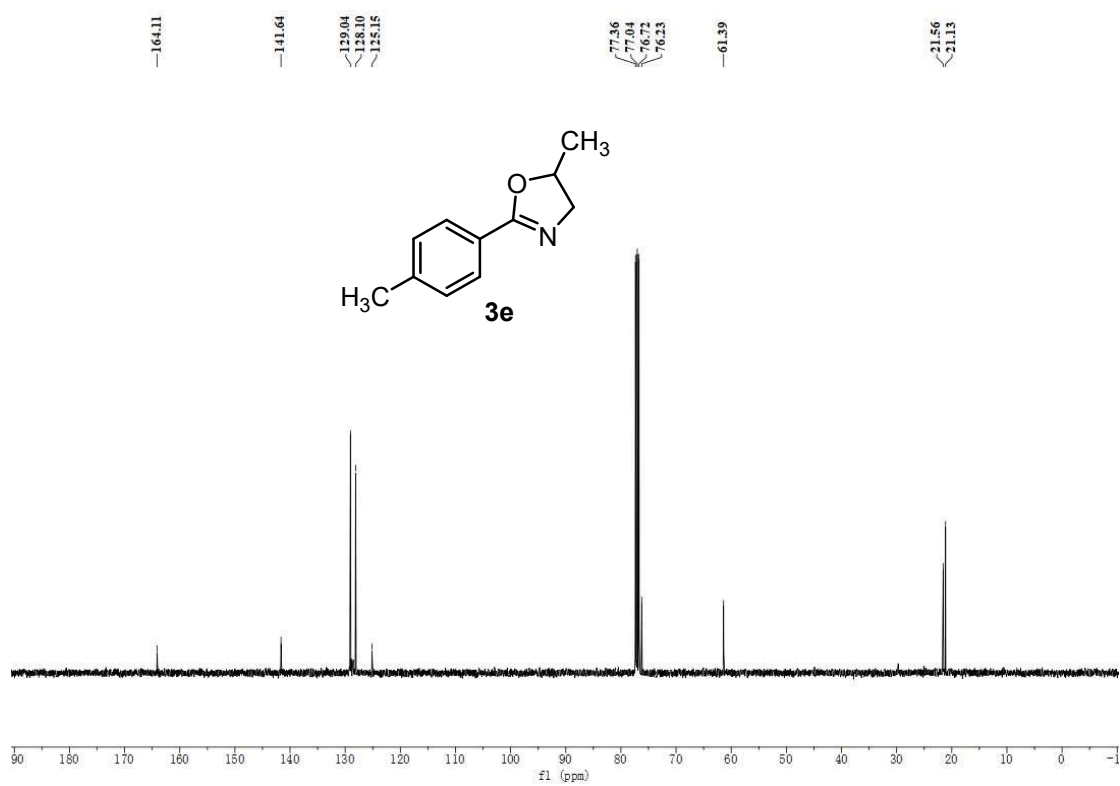

**Figure S26.** <sup>13</sup>C NMR spectrum of **3e** in CDCl<sub>3</sub> (100 MHz).

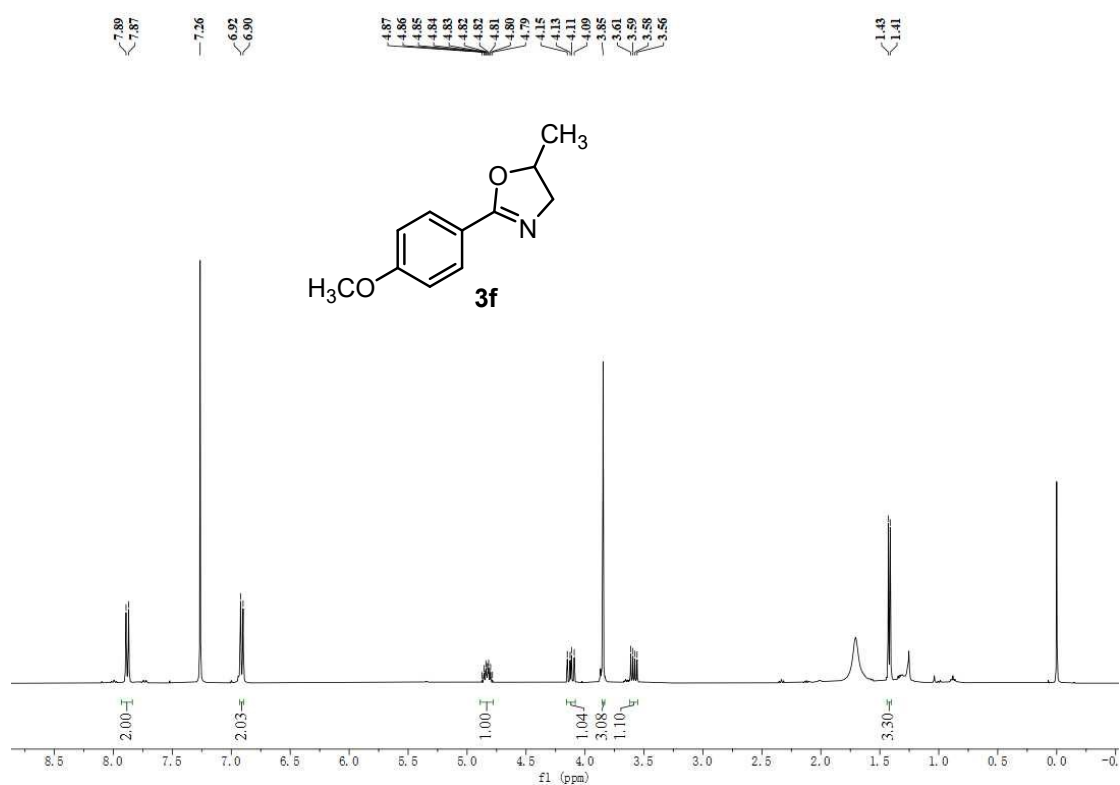

**Figure S27.** <sup>1</sup>H NMR spectrum of **3f** in CDCl<sub>3</sub> (400 MHz).

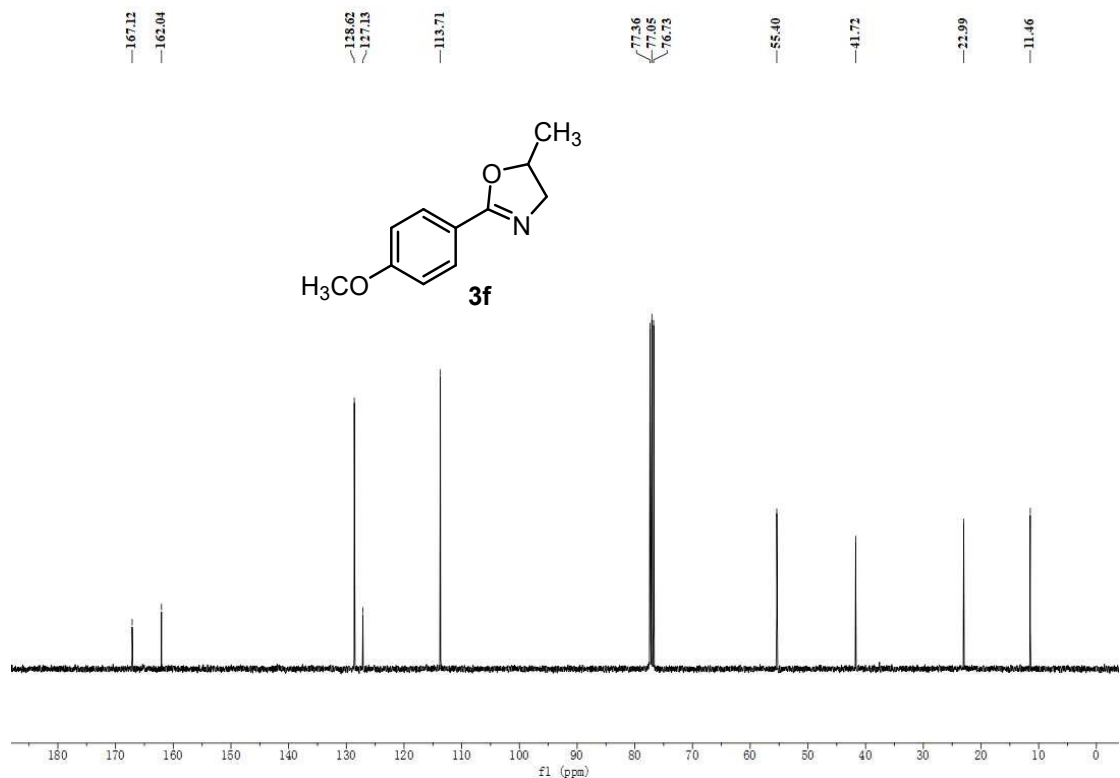

**Figure S28.** <sup>13</sup>C NMR spectrum of **3f** in CDCl<sub>3</sub> (100 MHz).

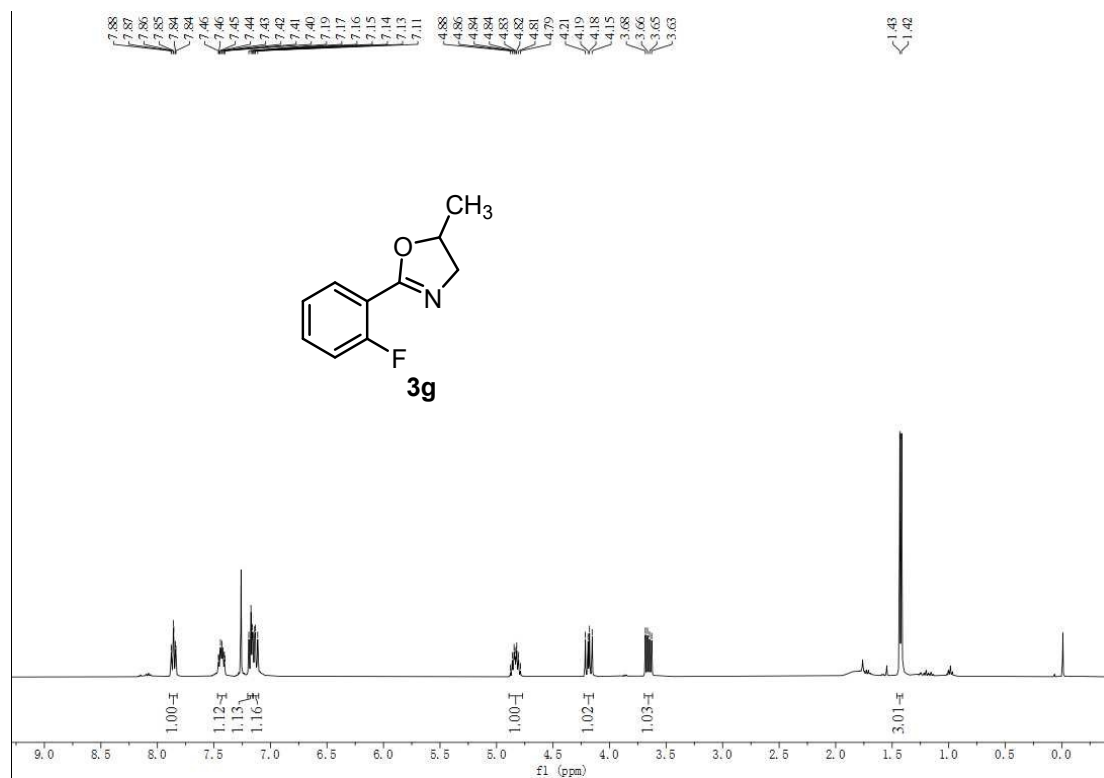

**Figure S29.** <sup>1</sup>H NMR spectrum of **3g** in CDCl<sub>3</sub> (400 MHz).

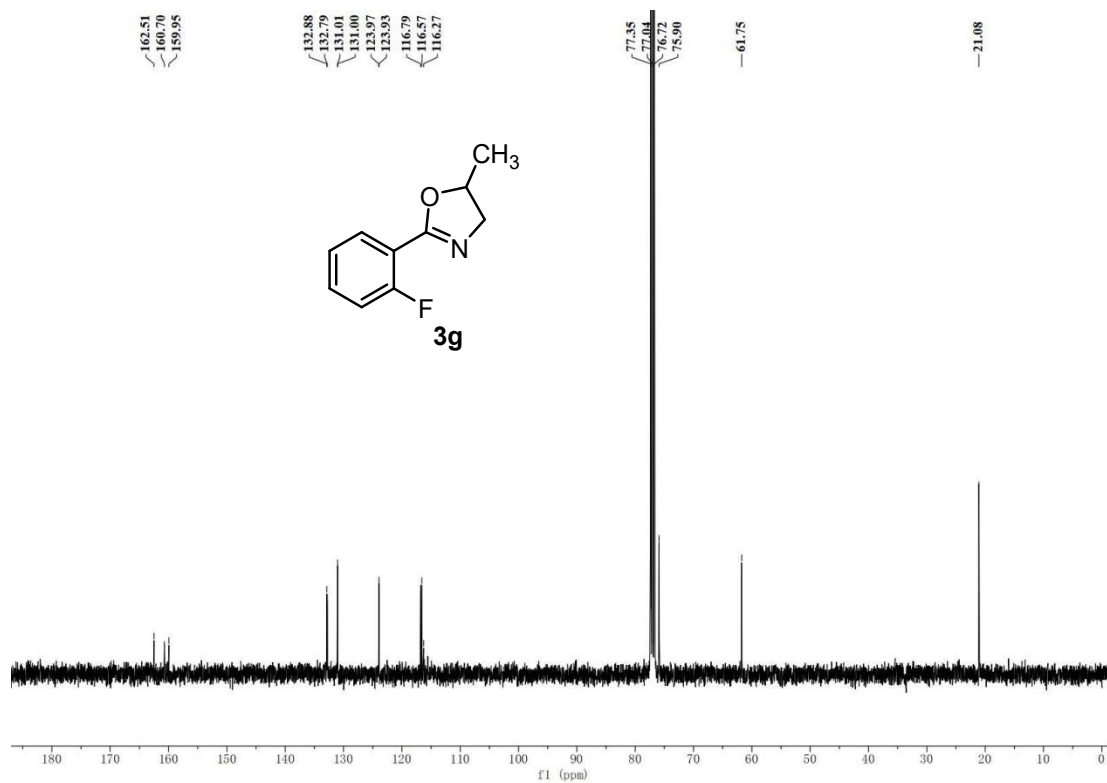

**Figure S30.** <sup>13</sup>C NMR spectrum of **3g** in CDCl<sub>3</sub> (100 MHz).

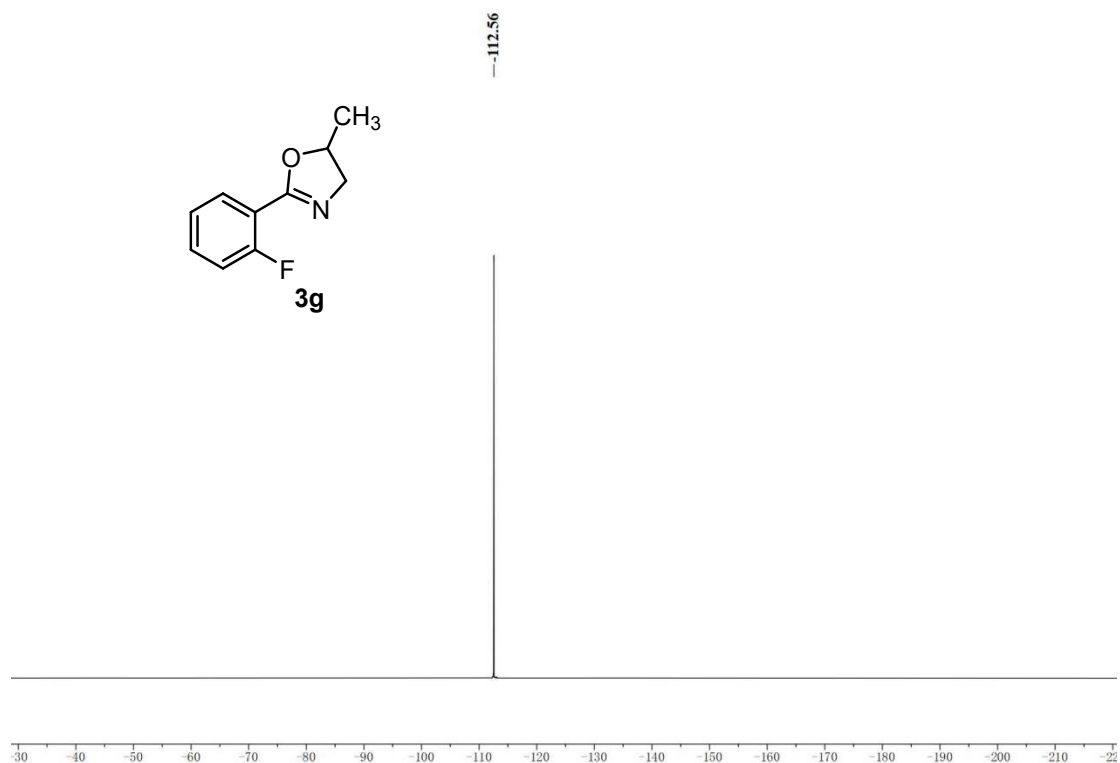

**Figure S31.**  $^{19}\text{F}$  NMR spectrum of **3g** in  $\text{CDCl}_3$  (376 MHz).

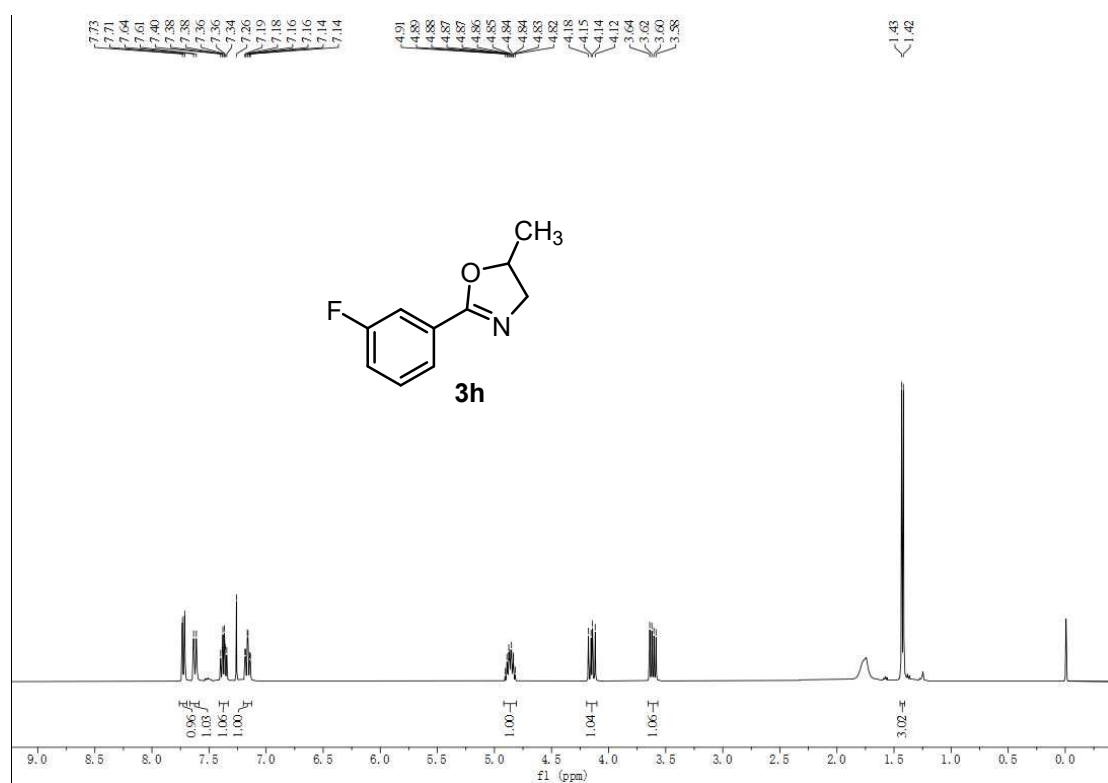

**Figure S32.**  $^1\text{H}$  NMR spectrum of **3h** in  $\text{CDCl}_3$  (400 MHz).

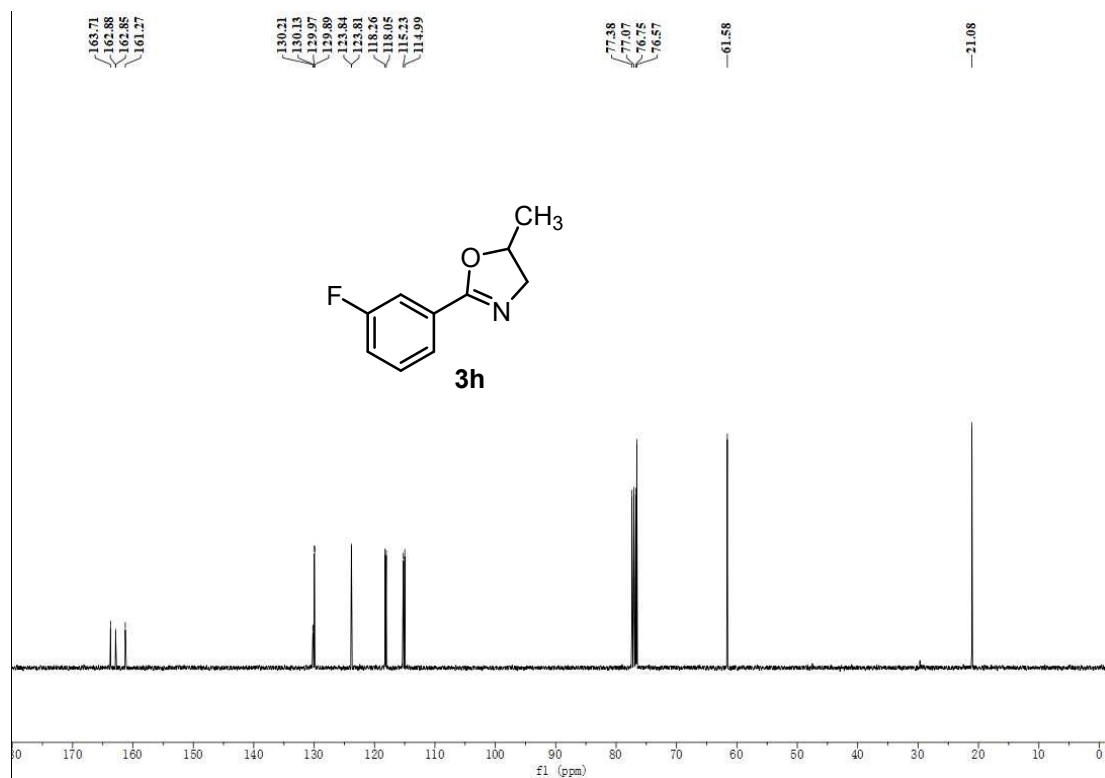

**Figure S33.** <sup>13</sup>C NMR spectrum of **3h** in CDCl<sub>3</sub> (100 MHz).

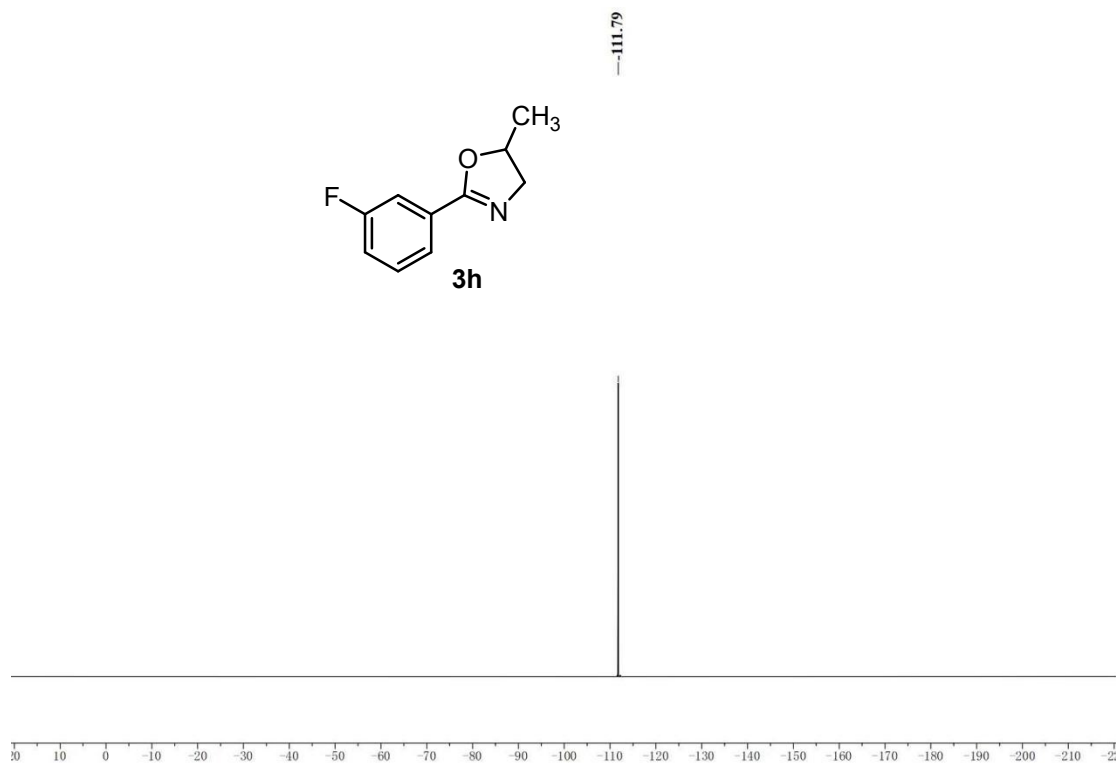

**Figure S34.** <sup>19</sup>F NMR spectrum of **3h** in CDCl<sub>3</sub> (376 MHz)



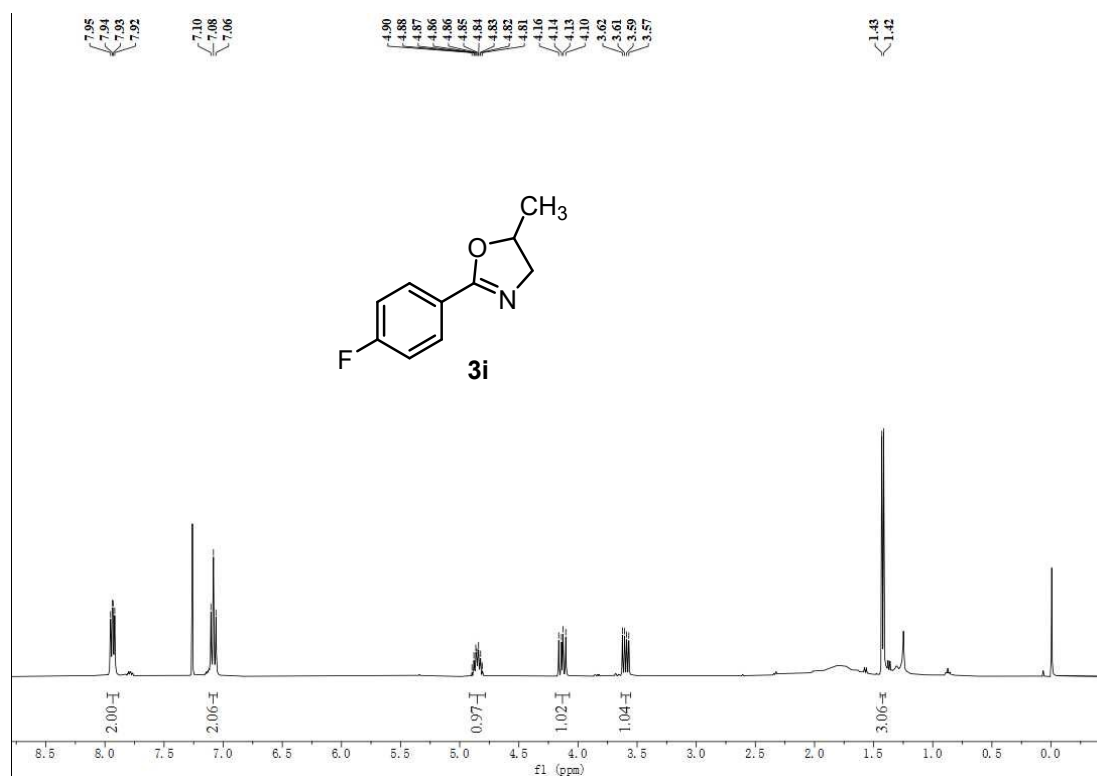

**Figure S35.** <sup>1</sup>H NMR spectrum of **3i** in CDCl<sub>3</sub> (400 MHz).

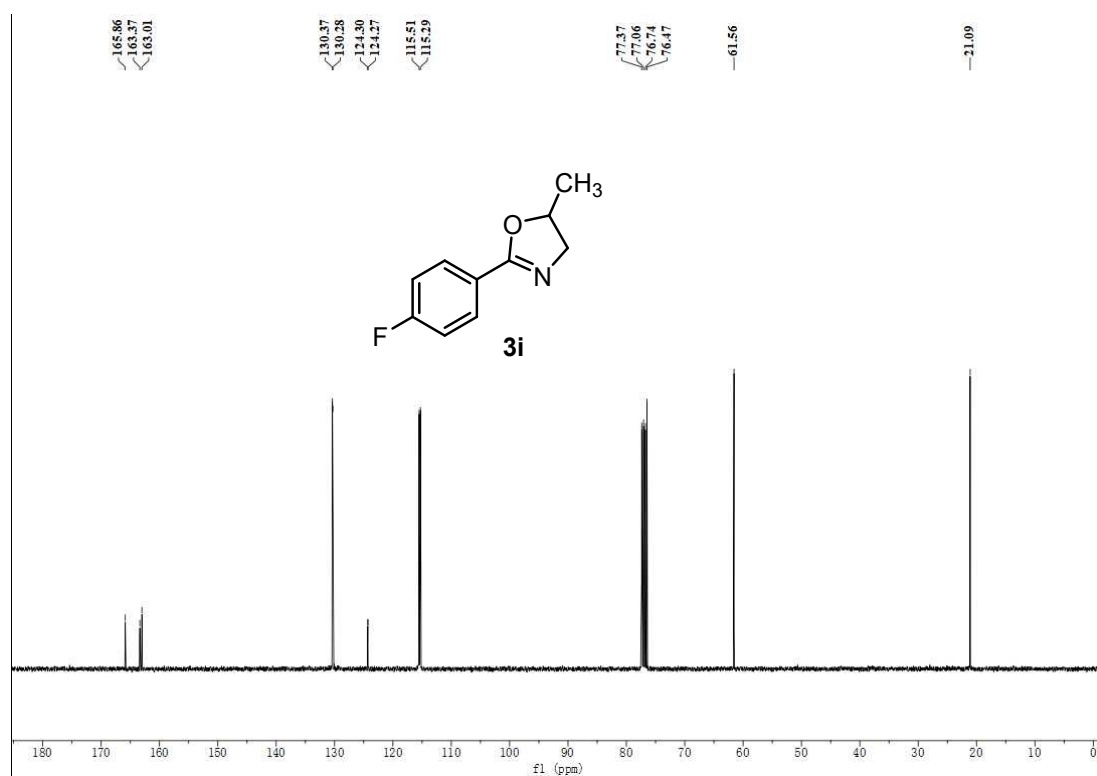

**Figure S36.** <sup>13</sup>C NMR spectrum of **3i** in CDCl<sub>3</sub> (100 MHz).

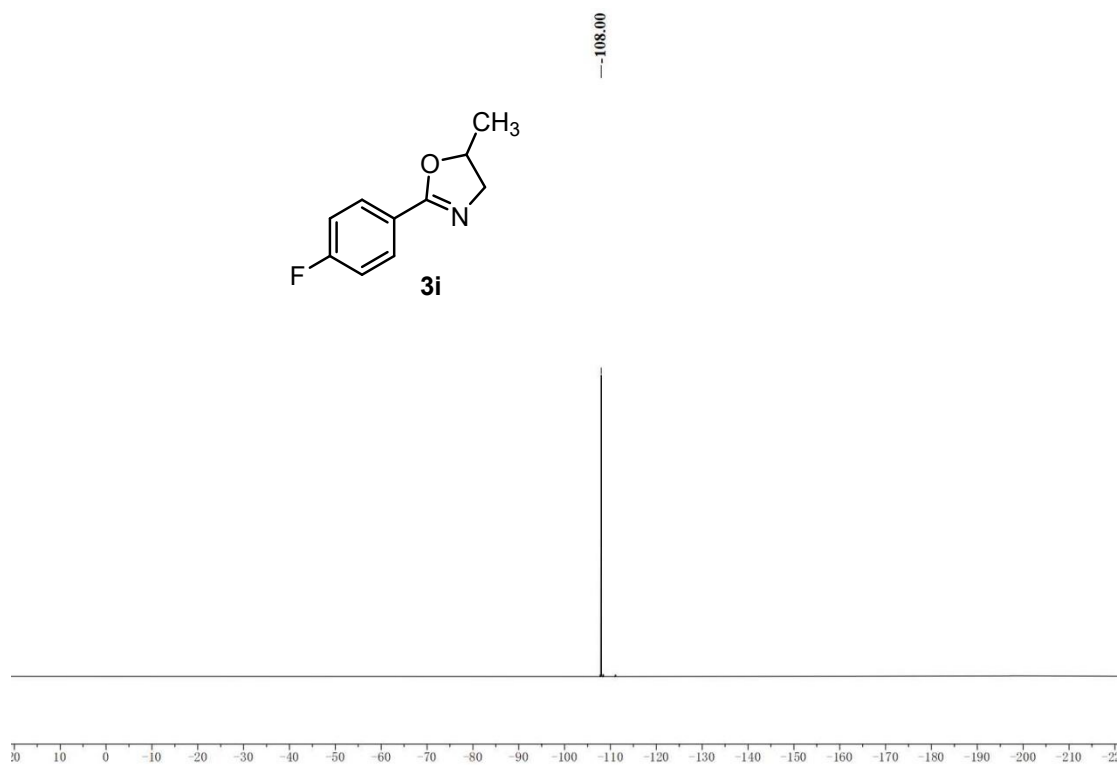

**Figure S37.**  $^{19}\text{F}$  NMR spectrum of **3i** in  $\text{CDCl}_3$  (376 MHz).

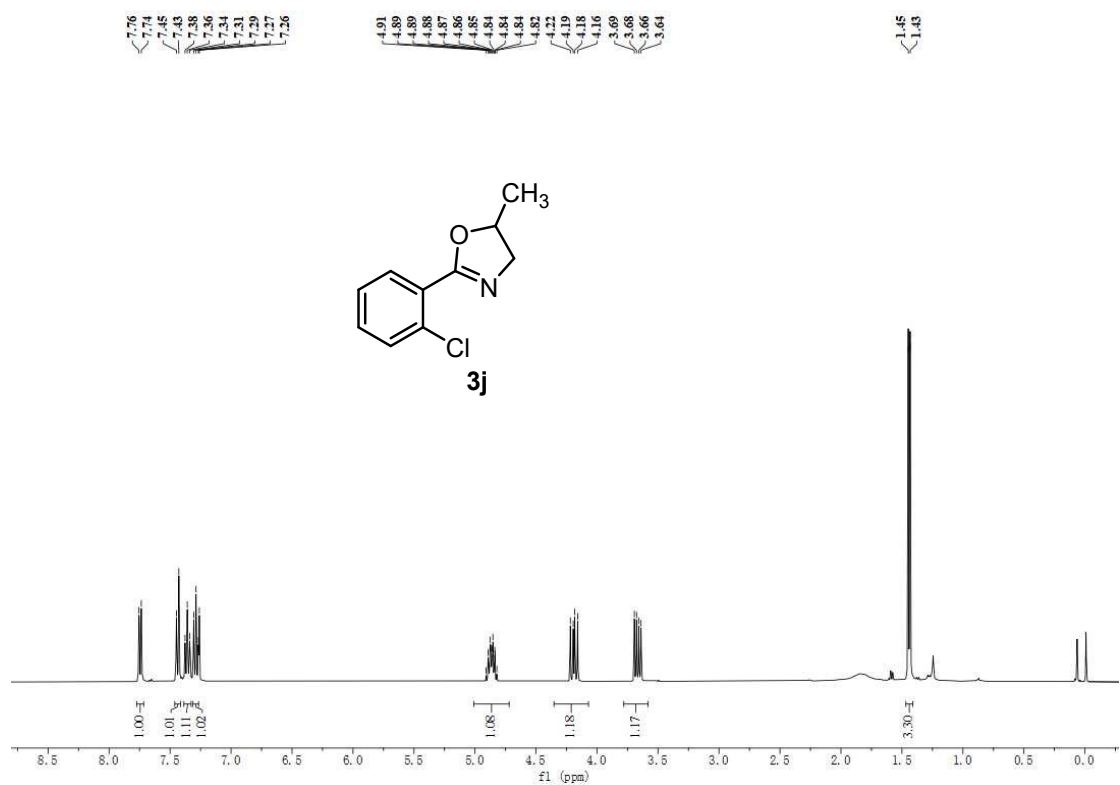

**Figure S38.**  $^1\text{H}$  NMR spectrum of **3j** in  $\text{CDCl}_3$  (400 MHz).

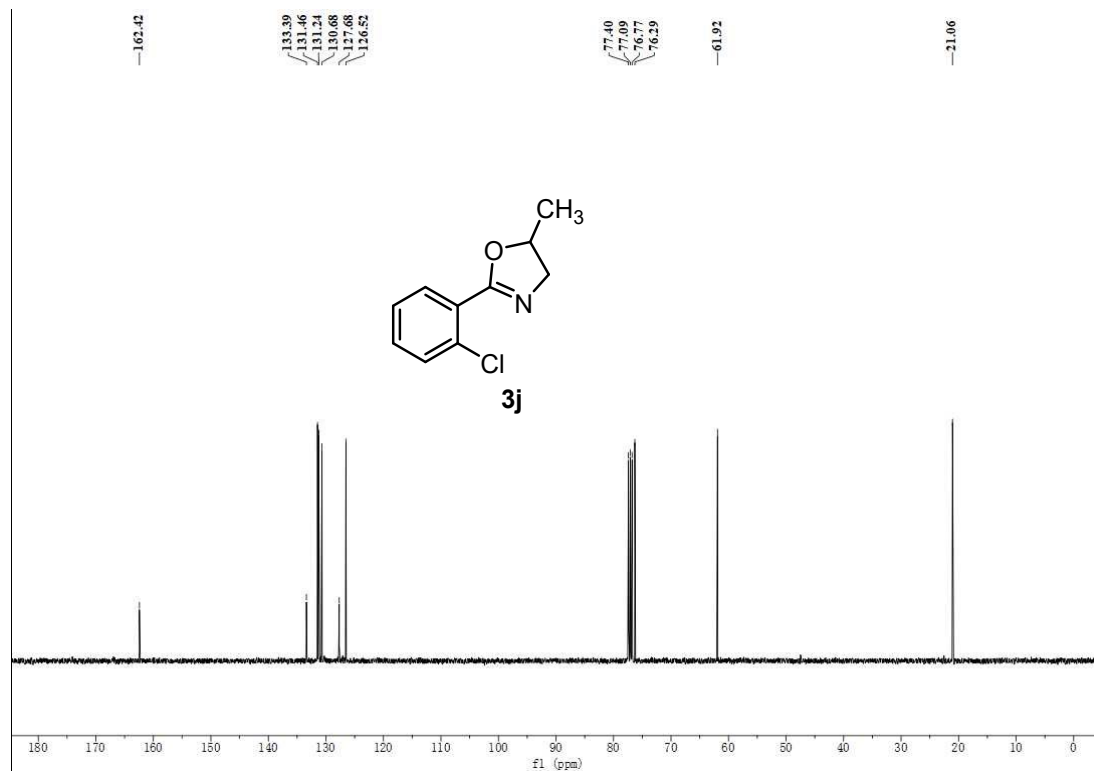

**Figure S39.** <sup>13</sup>C NMR spectrum of **3j** in CDCl<sub>3</sub> (100 MHz).

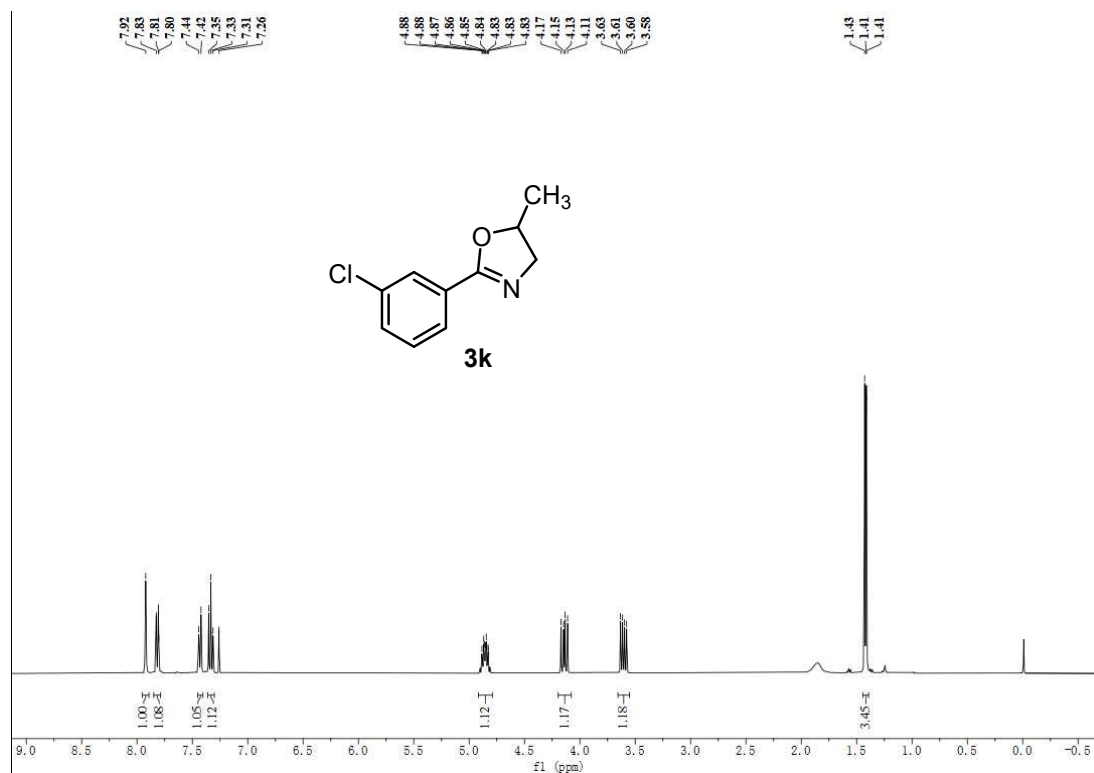

**Figure S40.** <sup>1</sup>H NMR spectrum of **3k** in CDCl<sub>3</sub> (400 MHz).

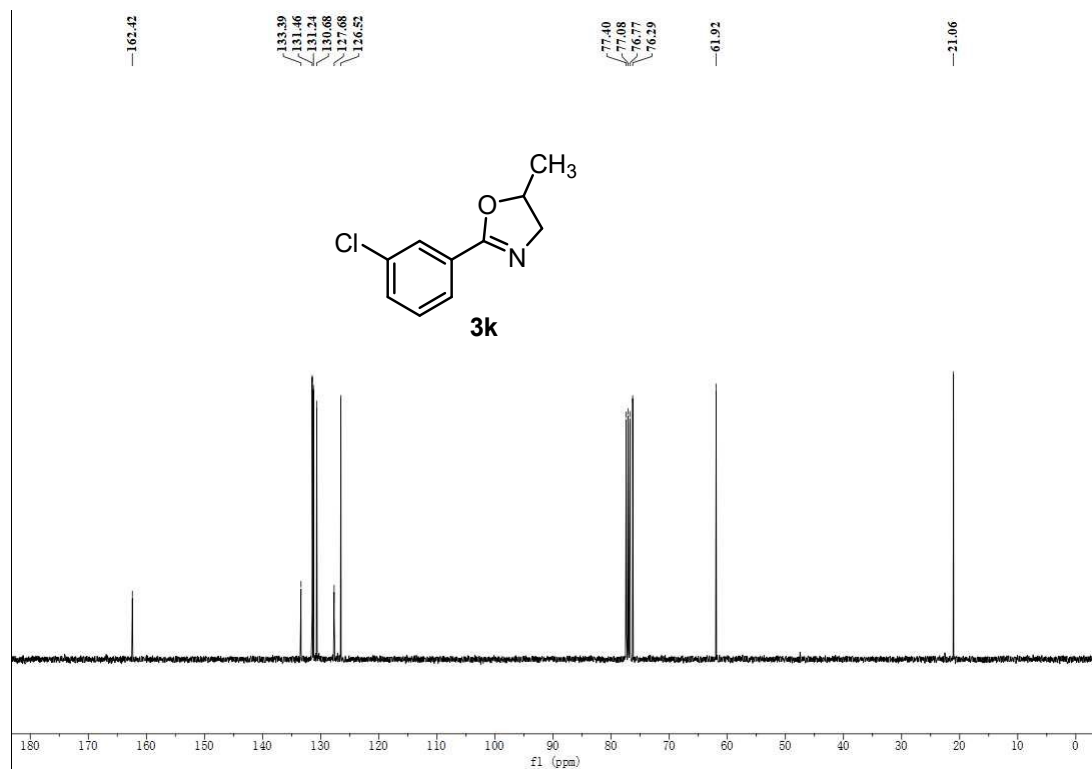

**Figure S41.** <sup>13</sup>C NMR spectrum of **3k** in CDCl<sub>3</sub> (100 MHz).

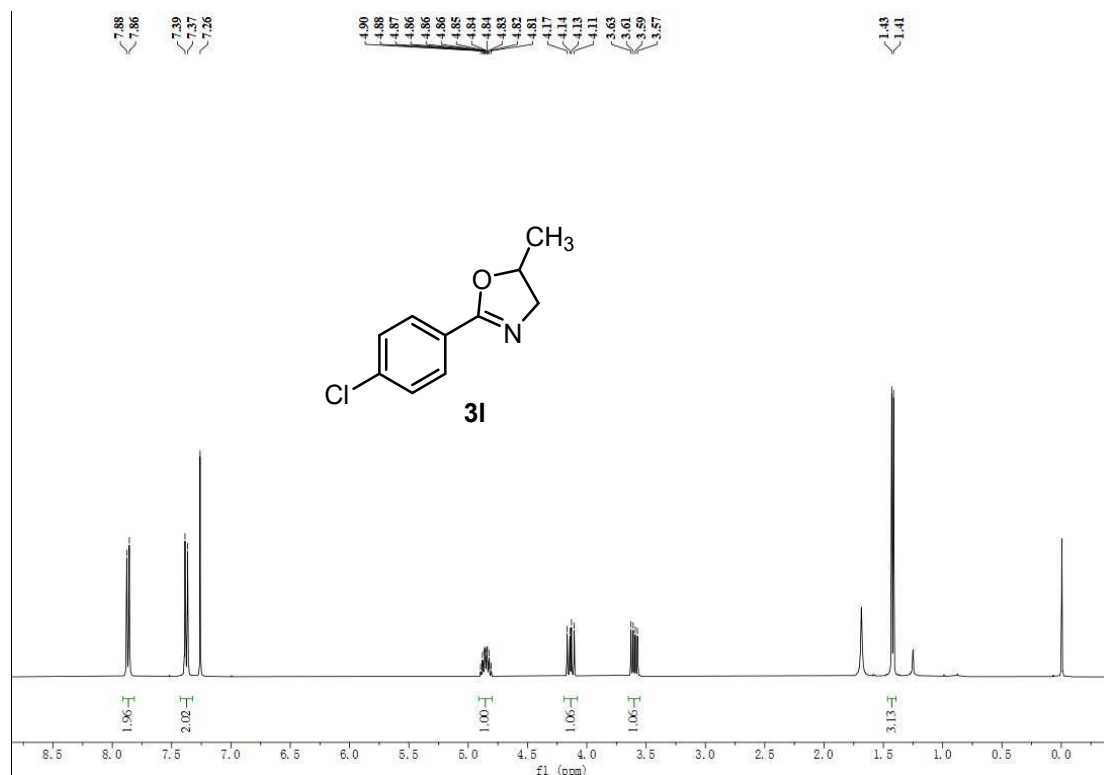

**Figure S42.** <sup>1</sup>H NMR spectrum of **3l** in CDCl<sub>3</sub> (400 MHz).

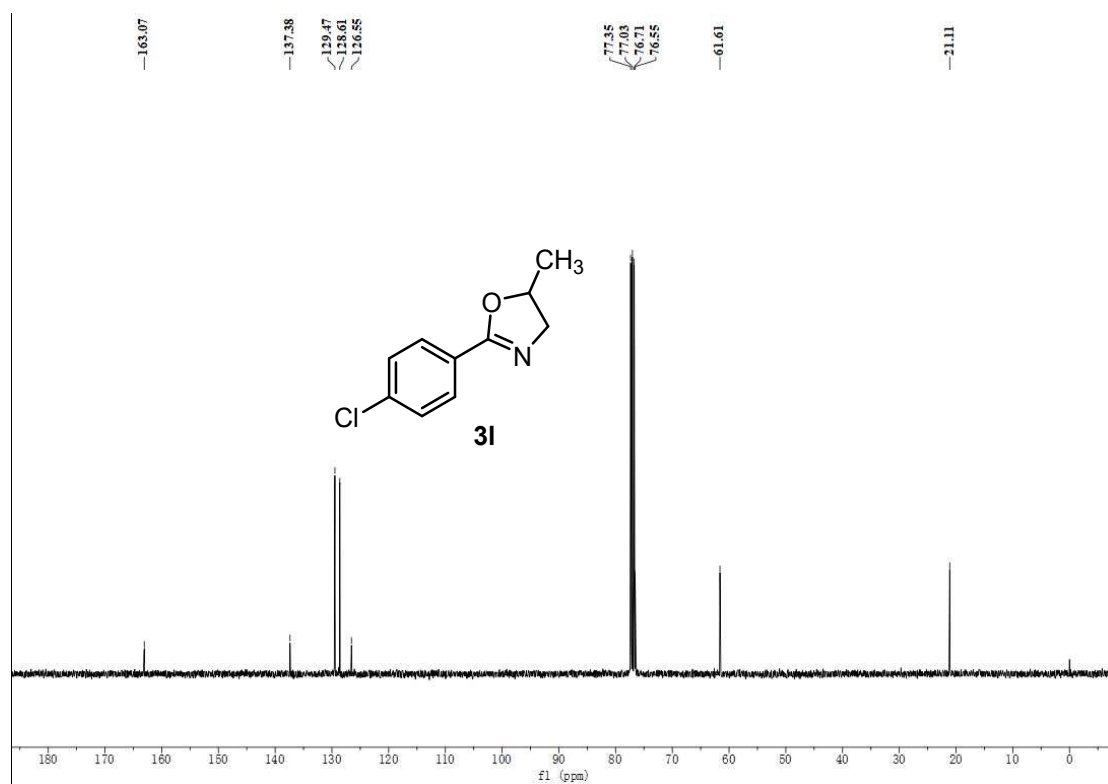

**Figure S43.** <sup>13</sup>C NMR spectrum of **3l** in CDCl<sub>3</sub> (100 MHz).

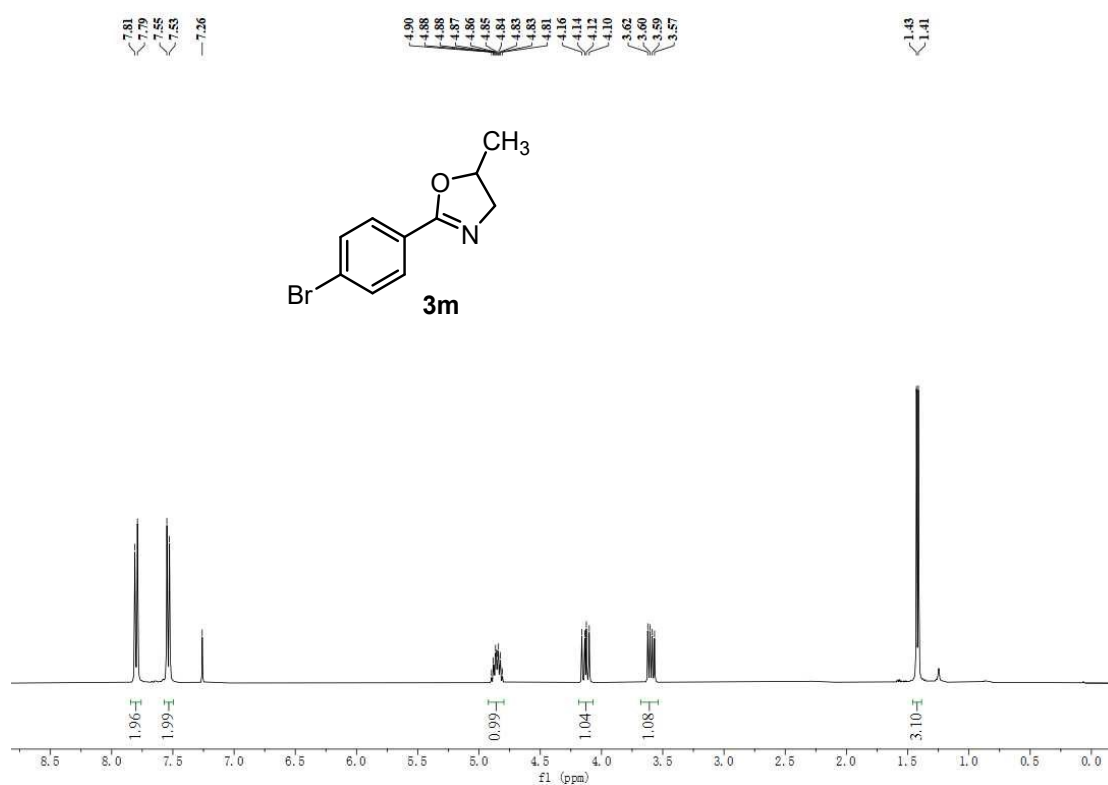

**Figure S44.** <sup>1</sup>H NMR spectrum of **3m** in CDCl<sub>3</sub> (400 MHz).

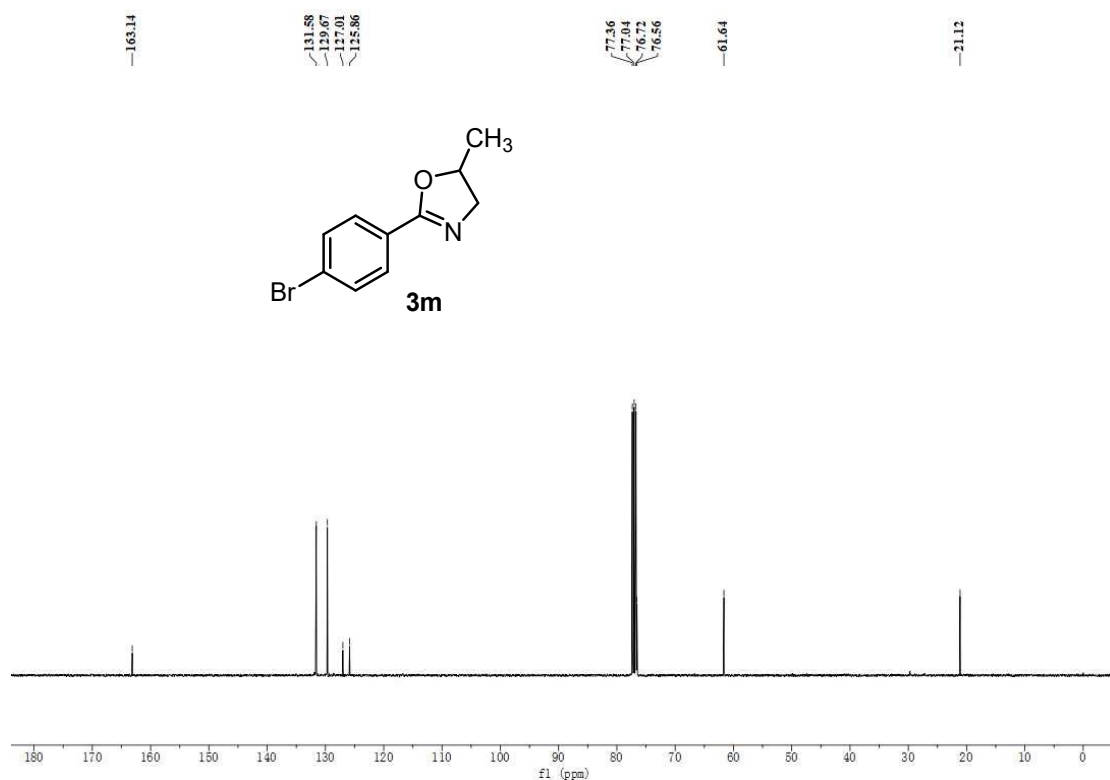

**Figure S45.** <sup>13</sup>C NMR spectrum of **3m** in CDCl<sub>3</sub> (100 MHz).

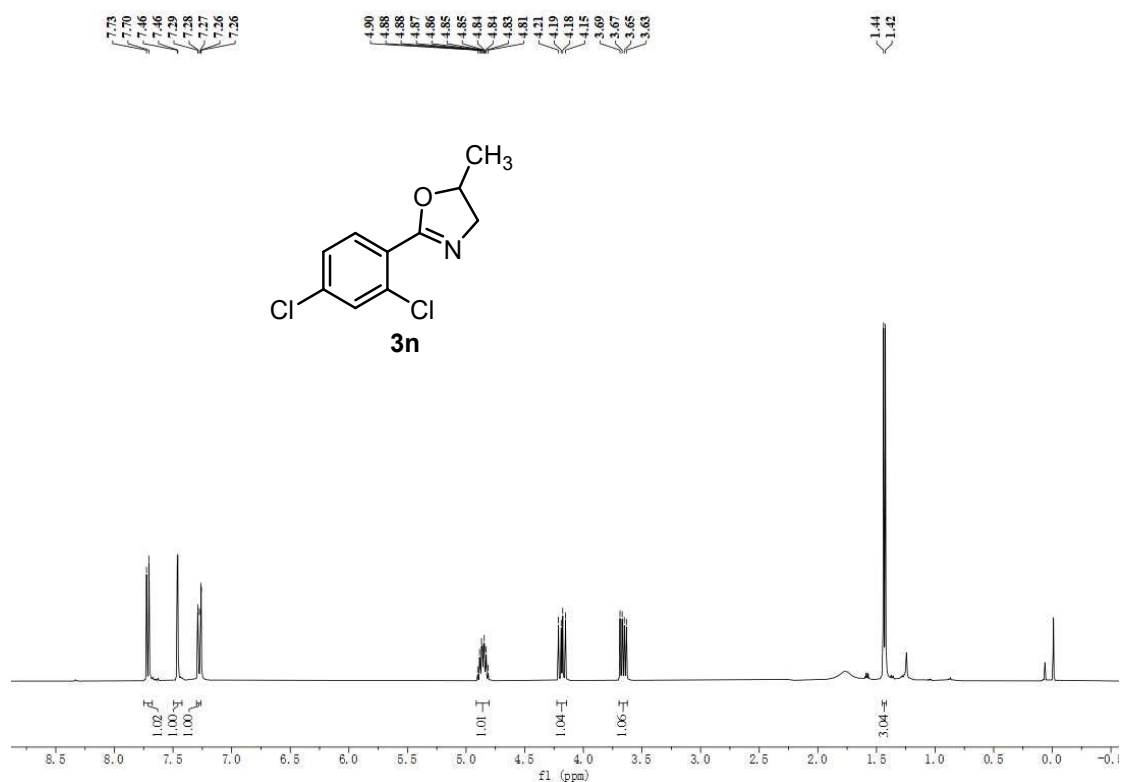

**Figure S46.** <sup>1</sup>H NMR spectrum of **3n** in CDCl<sub>3</sub> (400 MHz).

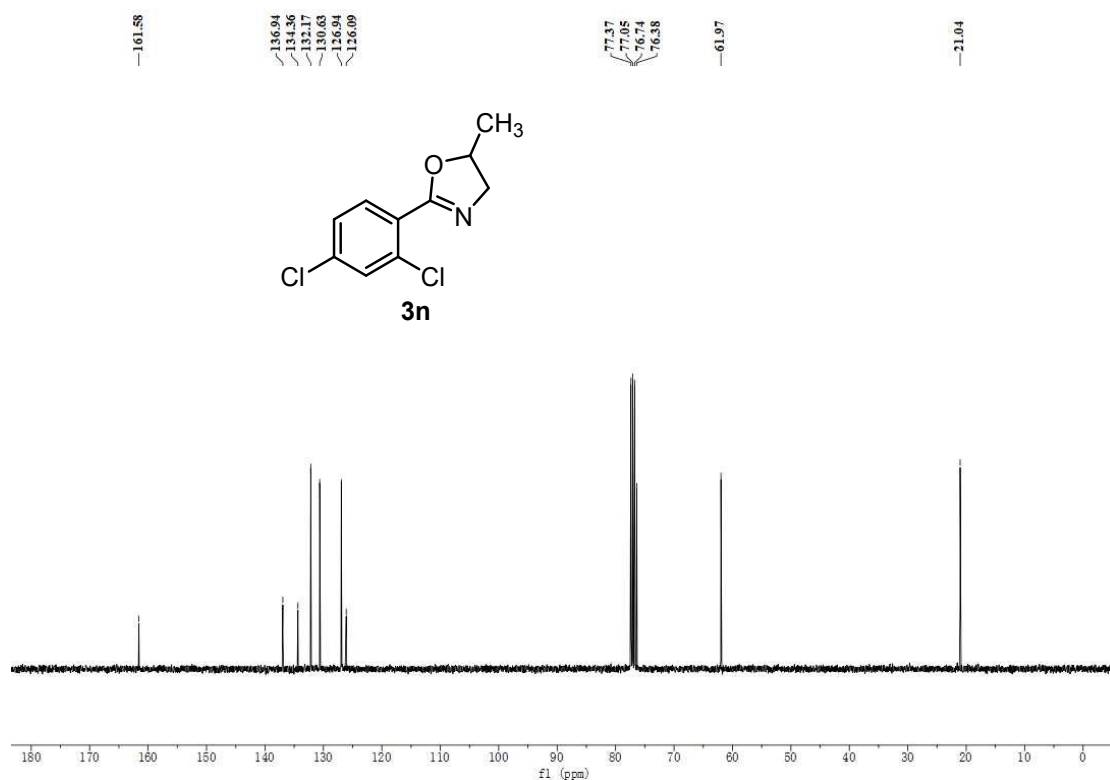

**Figure S47.**  $^{13}\text{C}$  NMR spectrum of **3n** in  $\text{CDCl}_3$  (100 MHz).

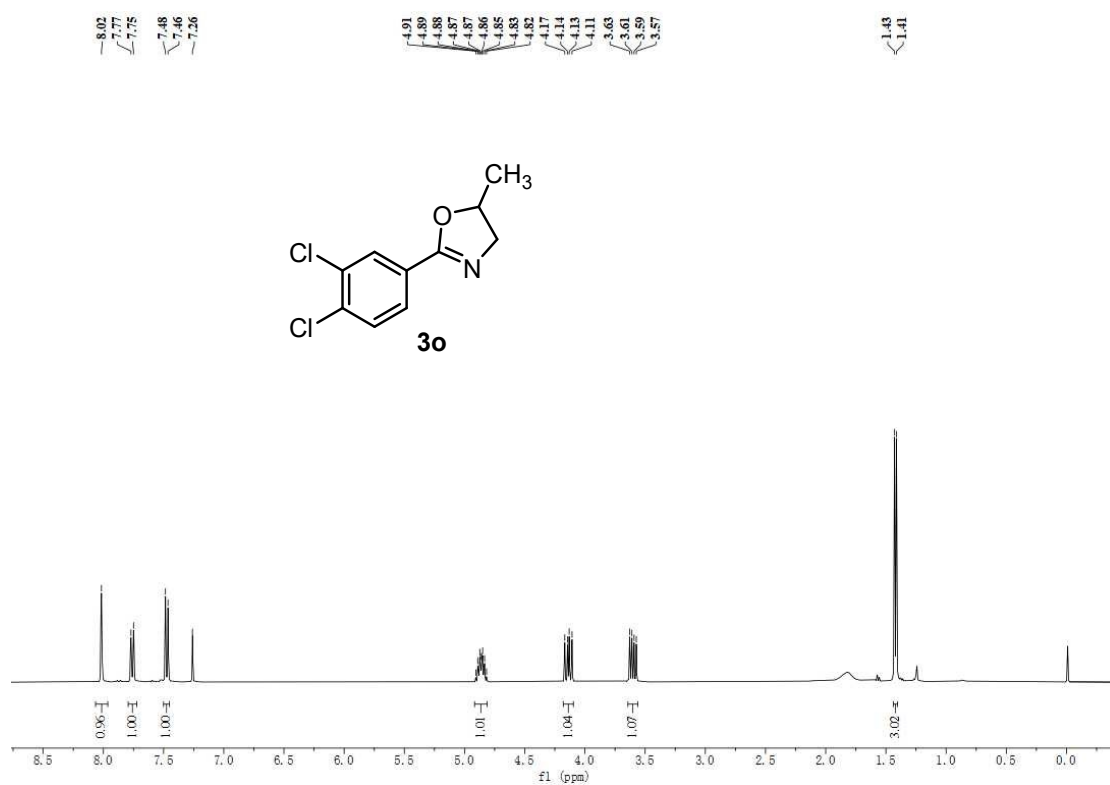

**Figure S48.**  $^1\text{H}$  NMR spectrum of **3o** in  $\text{CDCl}_3$  (400 MHz).

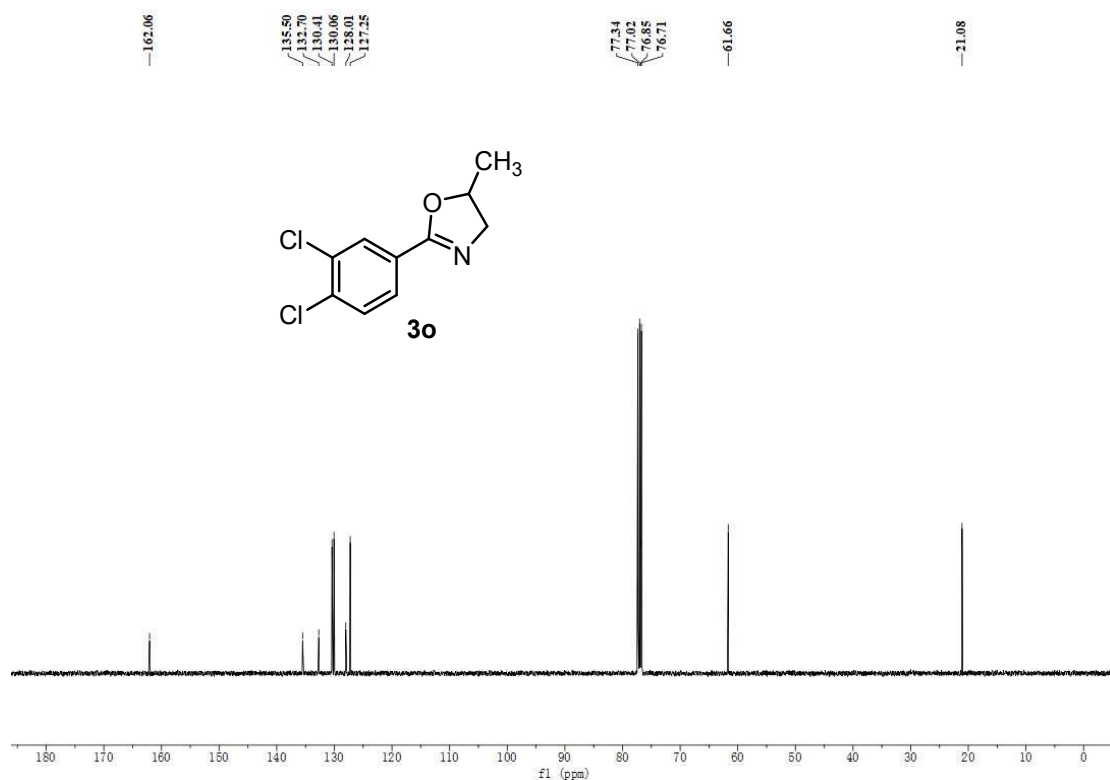

**Figure S49.** <sup>13</sup>C NMR spectrum of **3o** in CDCl<sub>3</sub> (100 MHz).

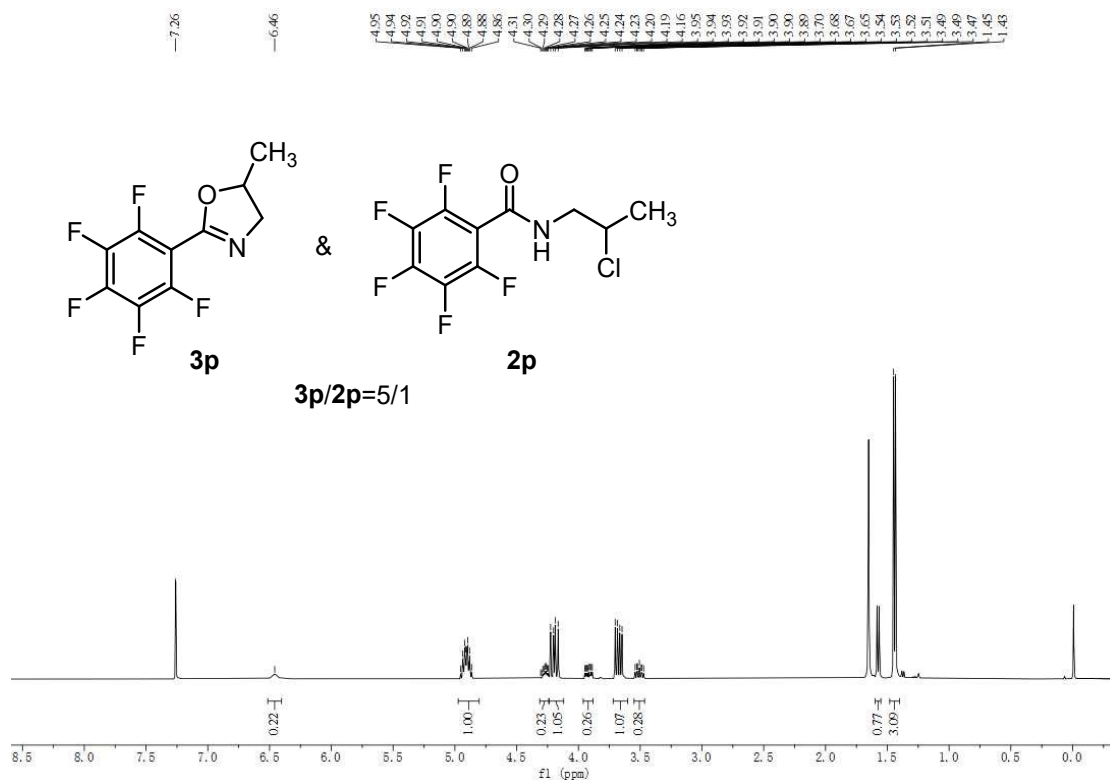

**Figure S50.** <sup>1</sup>H NMR spectrum of **3p** & **2p** in CDCl<sub>3</sub> (400 MHz).



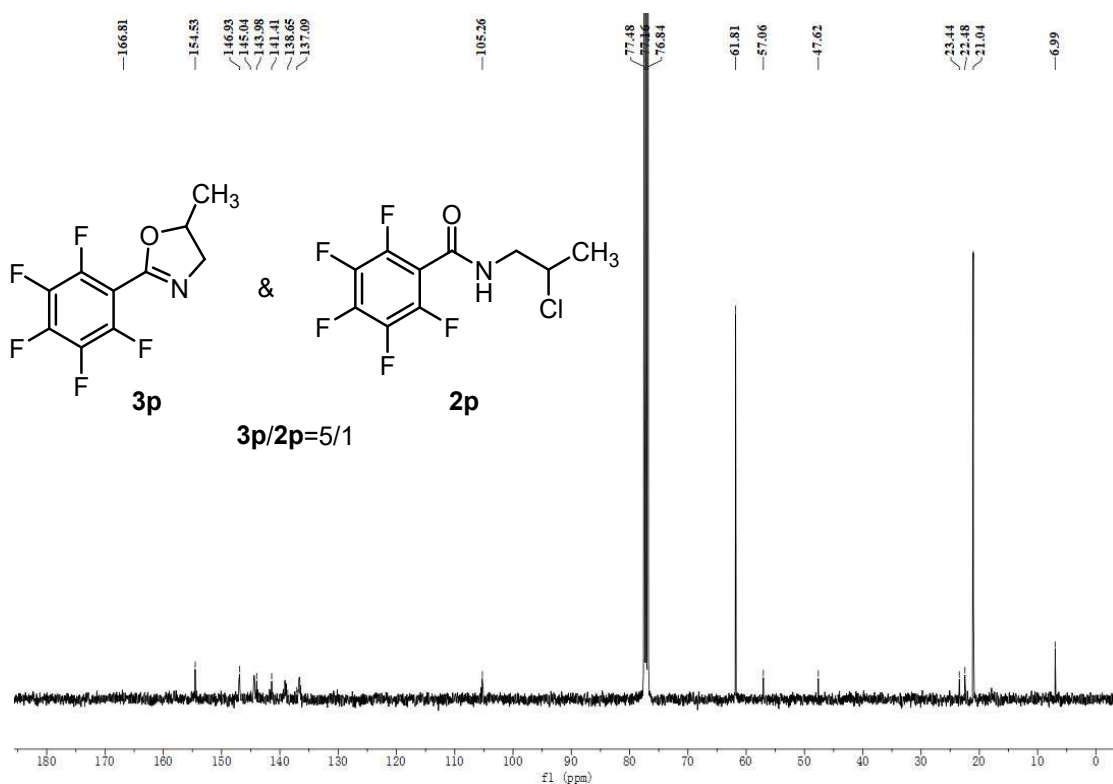

**Figure S51.**  $^{13}\text{C}$  NMR spectrum of **3p** & **2p** in  $\text{CDCl}_3$  (100 MHz).

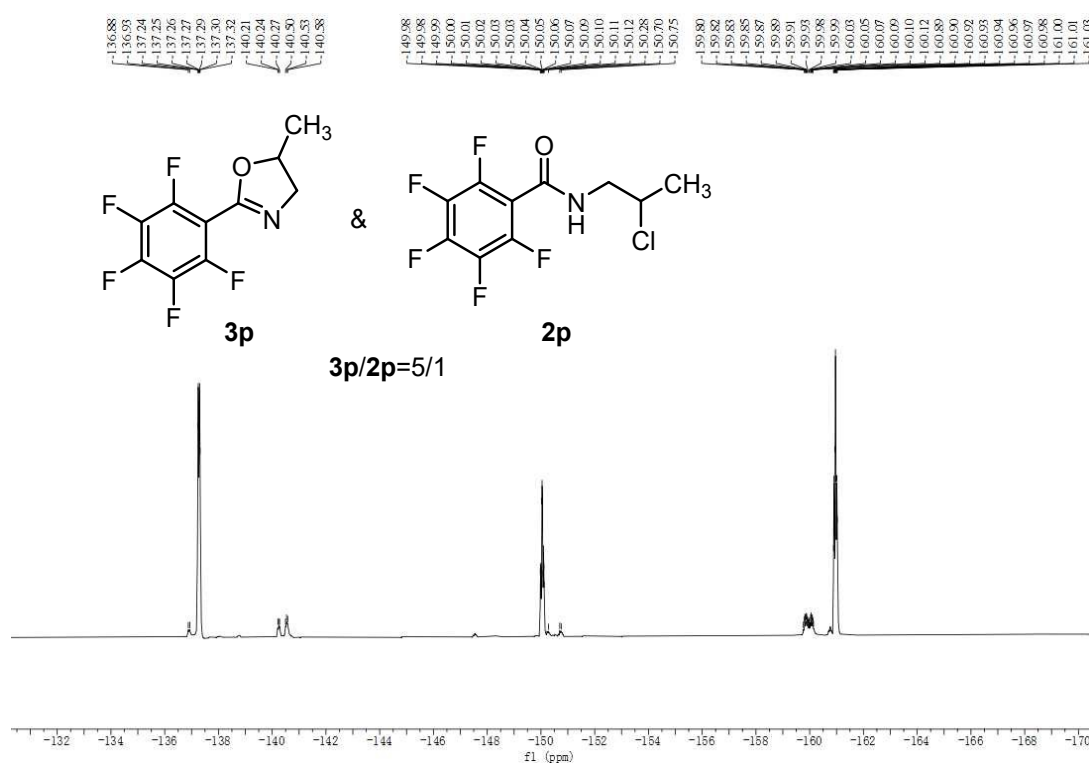

**Figure S51.**  $^{19}\text{F}$  NMR spectrum of **3p** and **2p** in  $\text{CDCl}_3$  (376 MHz).

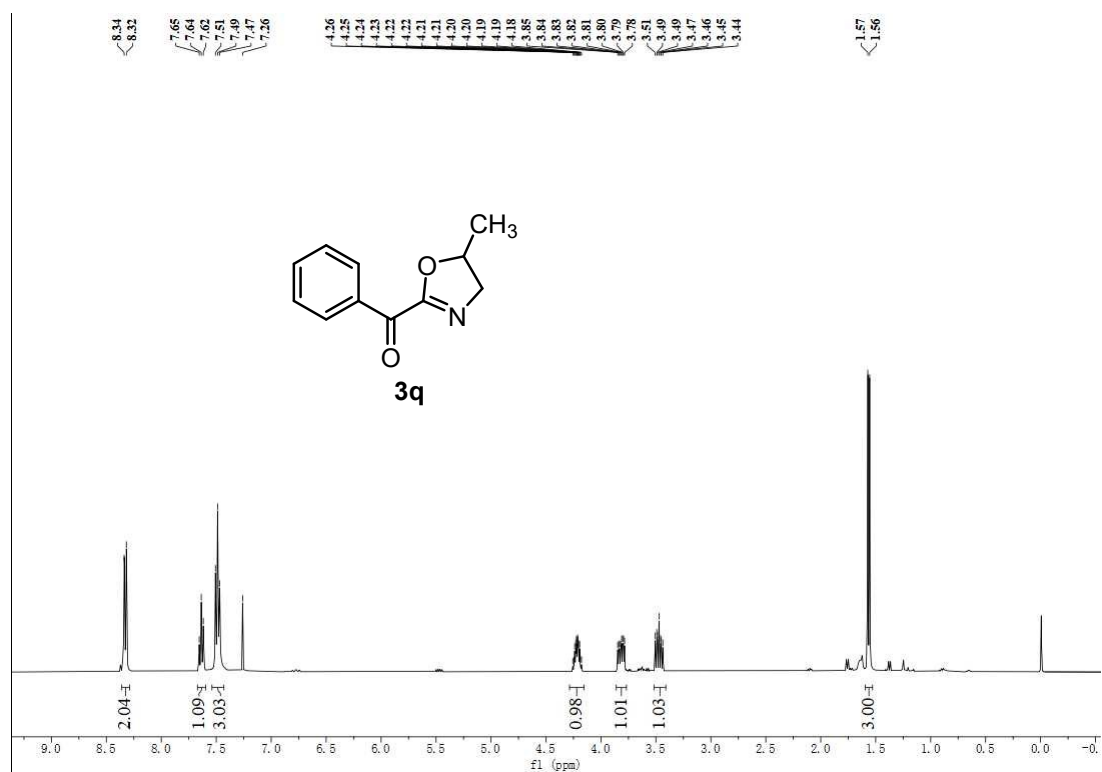

**Figure S53.** <sup>1</sup>H NMR spectrum of **3q** in CDCl<sub>3</sub> (400 MHz).

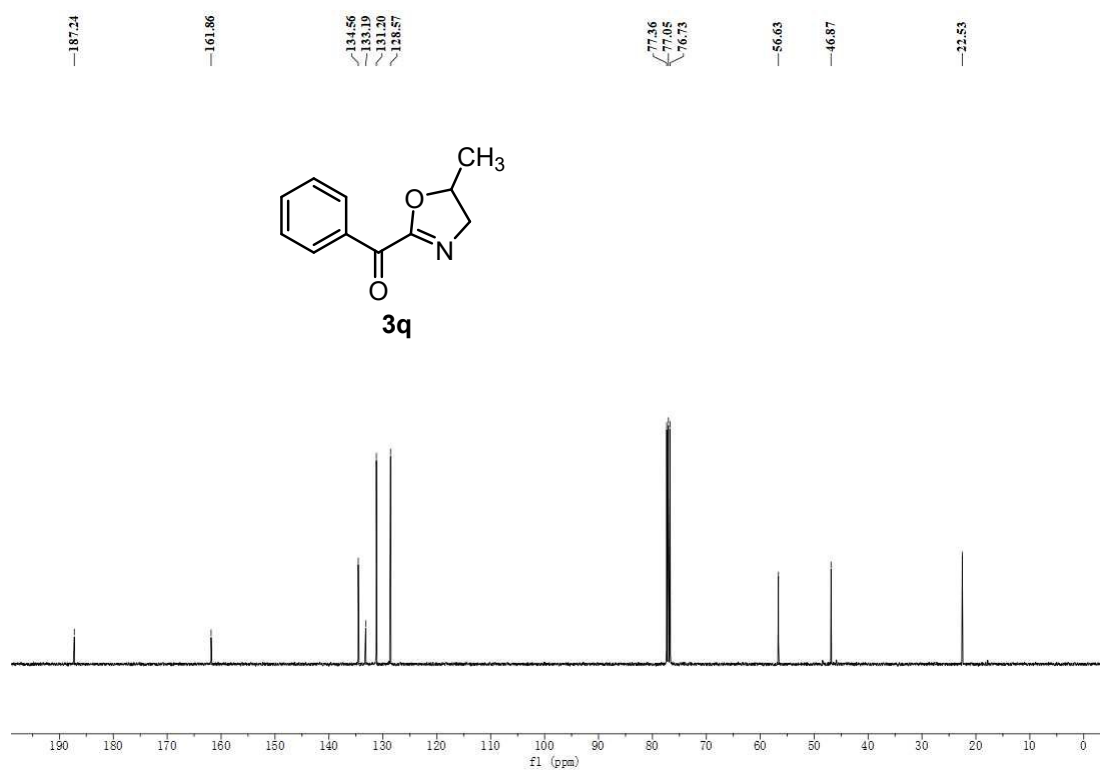

**Figure S54.** <sup>13</sup>C NMR spectrum of **3q** in CDCl<sub>3</sub> (100 MHz).

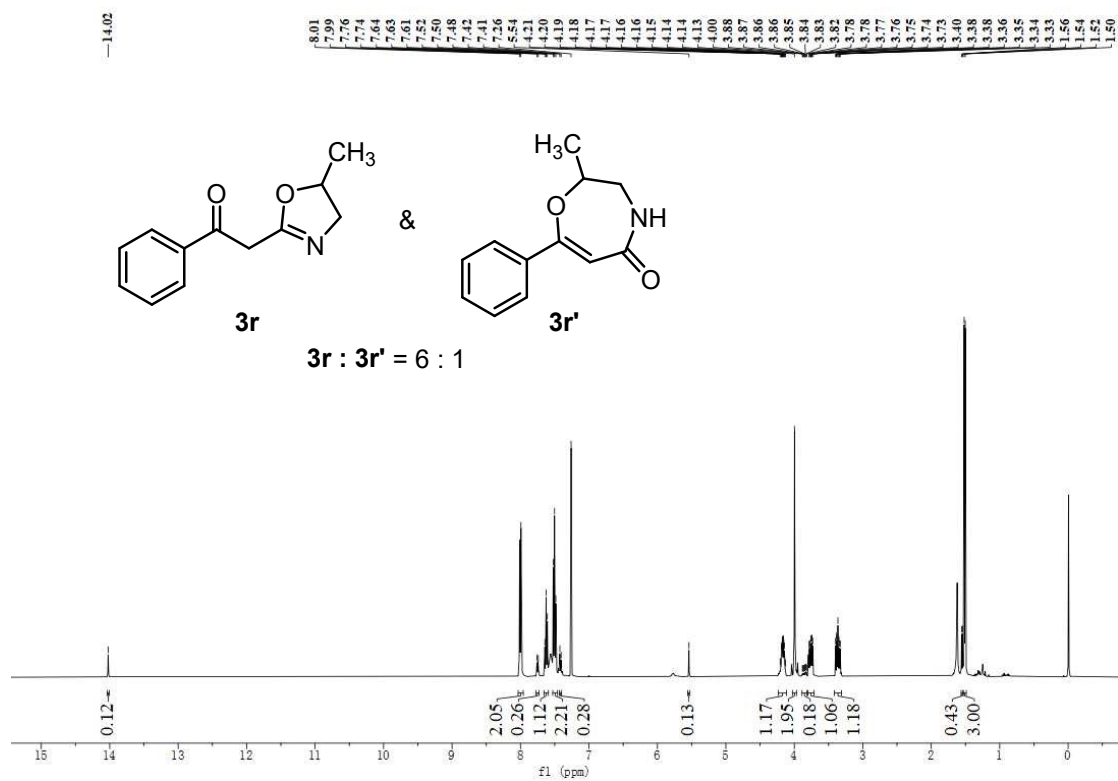

**Figure S55.** <sup>1</sup>H NMR spectrum of **3r** & **3r'** in CDCl<sub>3</sub> (400 MHz).

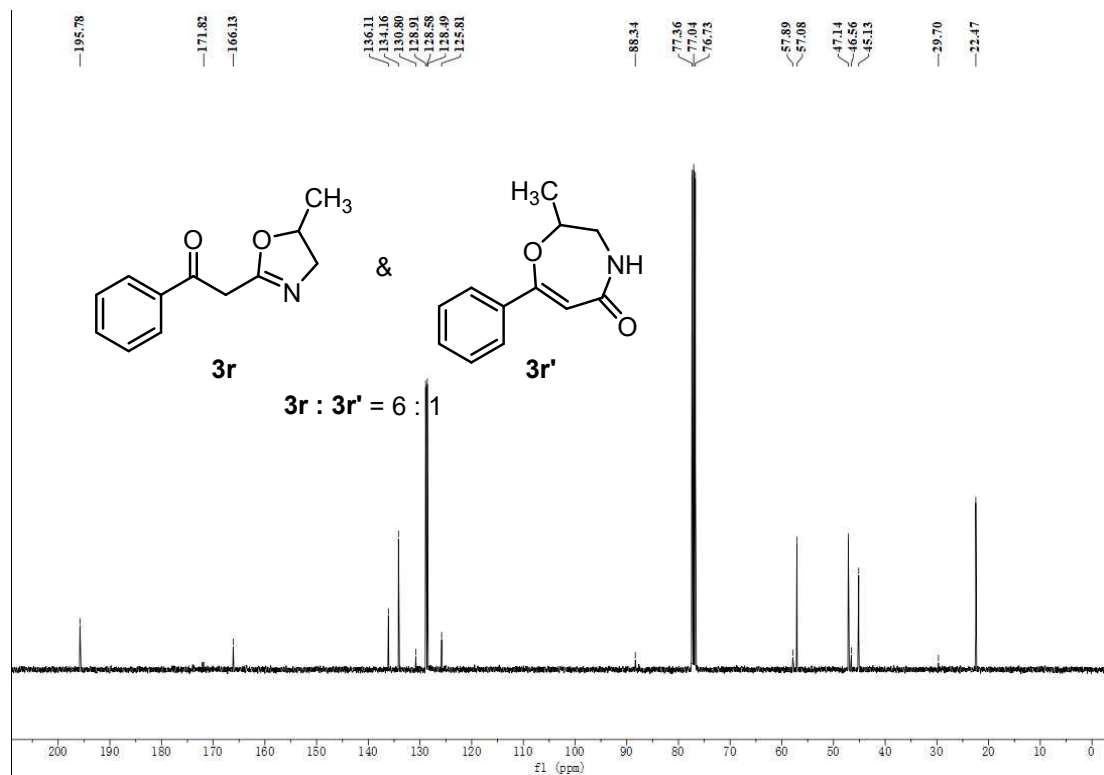

**Figure S56.** <sup>13</sup>C NMR spectrum of **3r** & **3r'** in CDCl<sub>3</sub> (100 MHz).

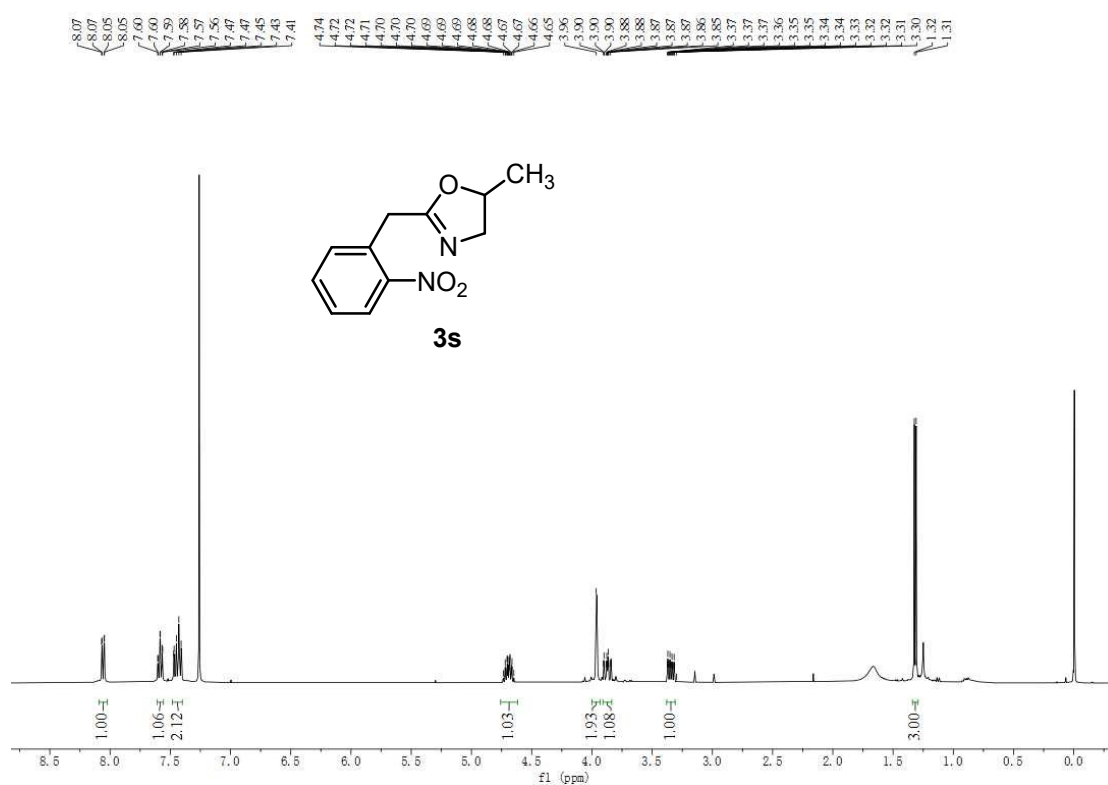

**Figure S57.** <sup>1</sup>H NMR spectrum of **3s** in CDCl<sub>3</sub> (400 MHz).

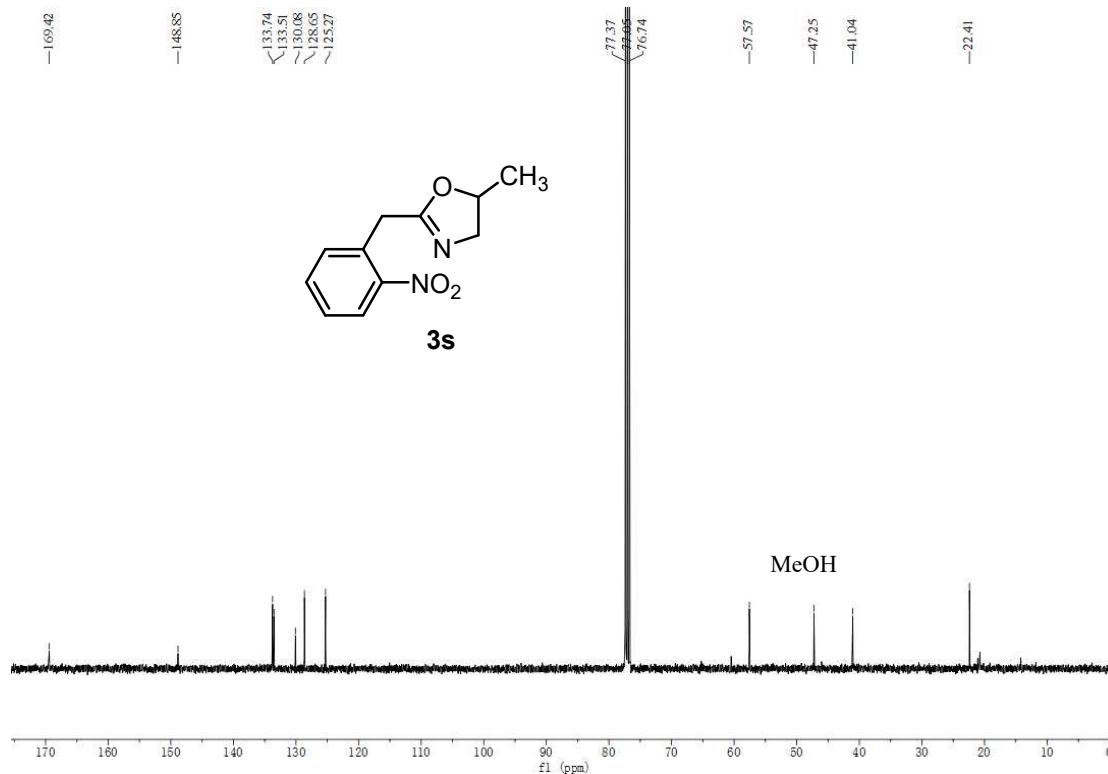

**Figure S58.** <sup>13</sup>C NMR spectrum of **3s** in CDCl<sub>3</sub> (100 MHz).

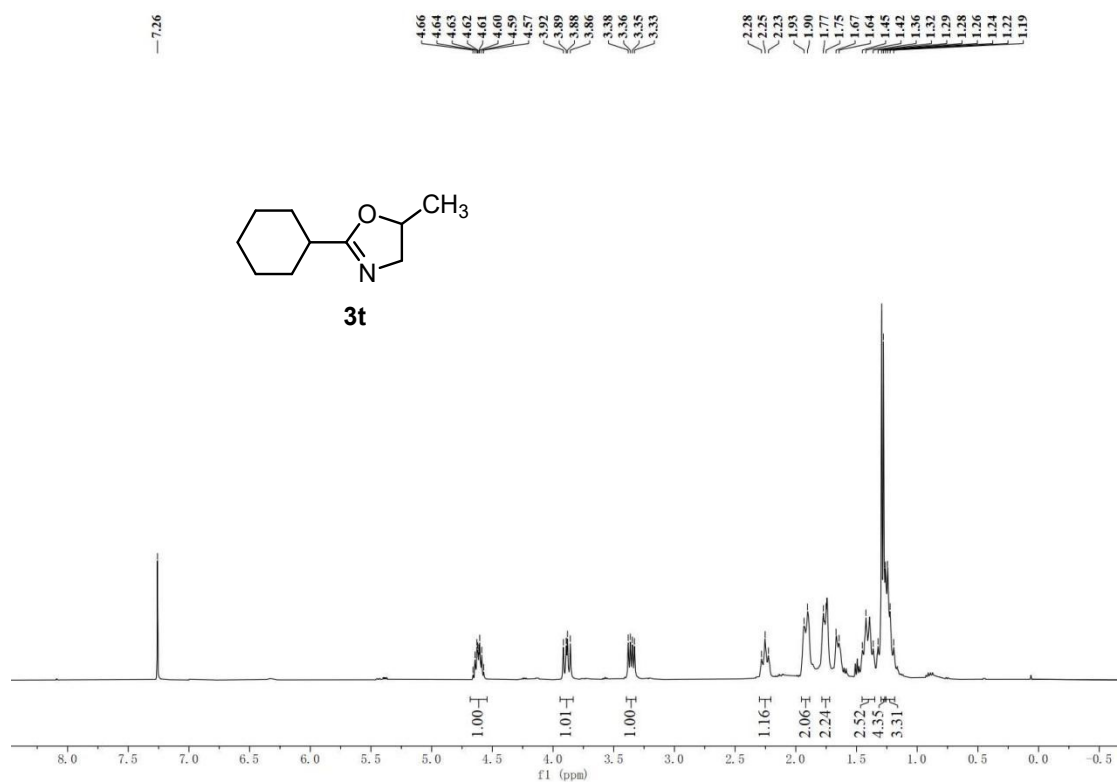

**Figure S59.**  $^1\text{H}$  NMR spectrum of **3t** in  $\text{CDCl}_3$  (400 MHz).

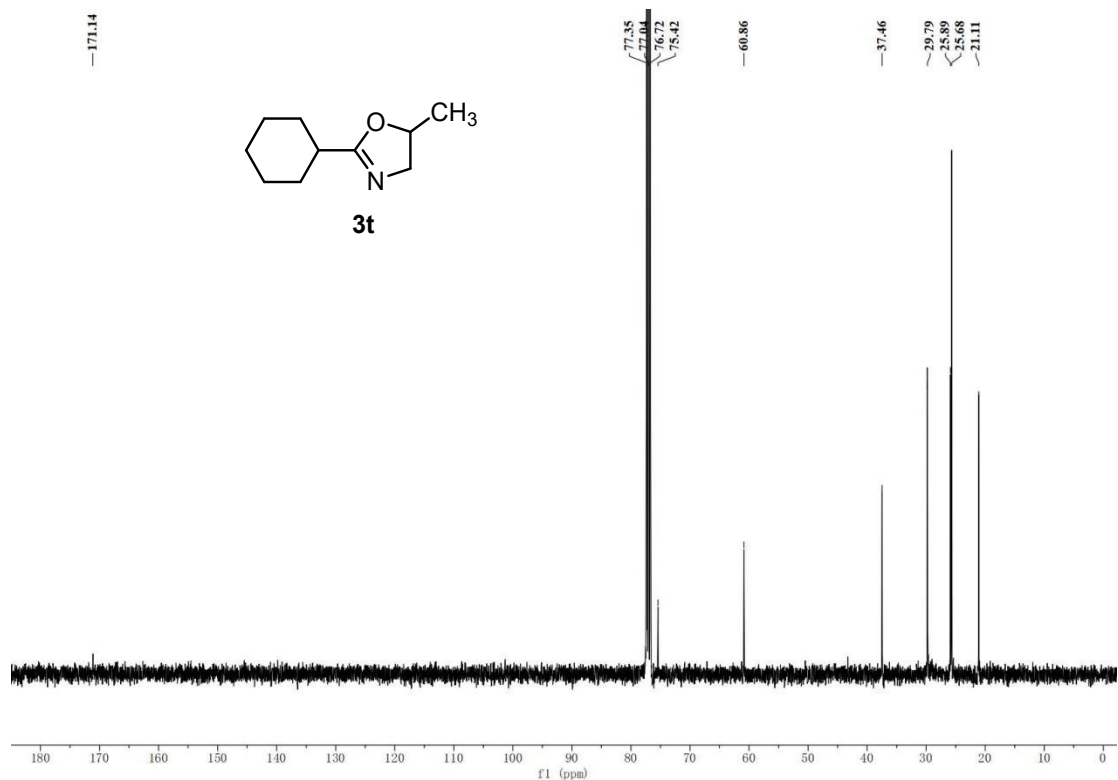

**Figure S60.**  $^{13}\text{C}$  NMR spectrum of **3t** in  $\text{CDCl}_3$  (100 MHz).

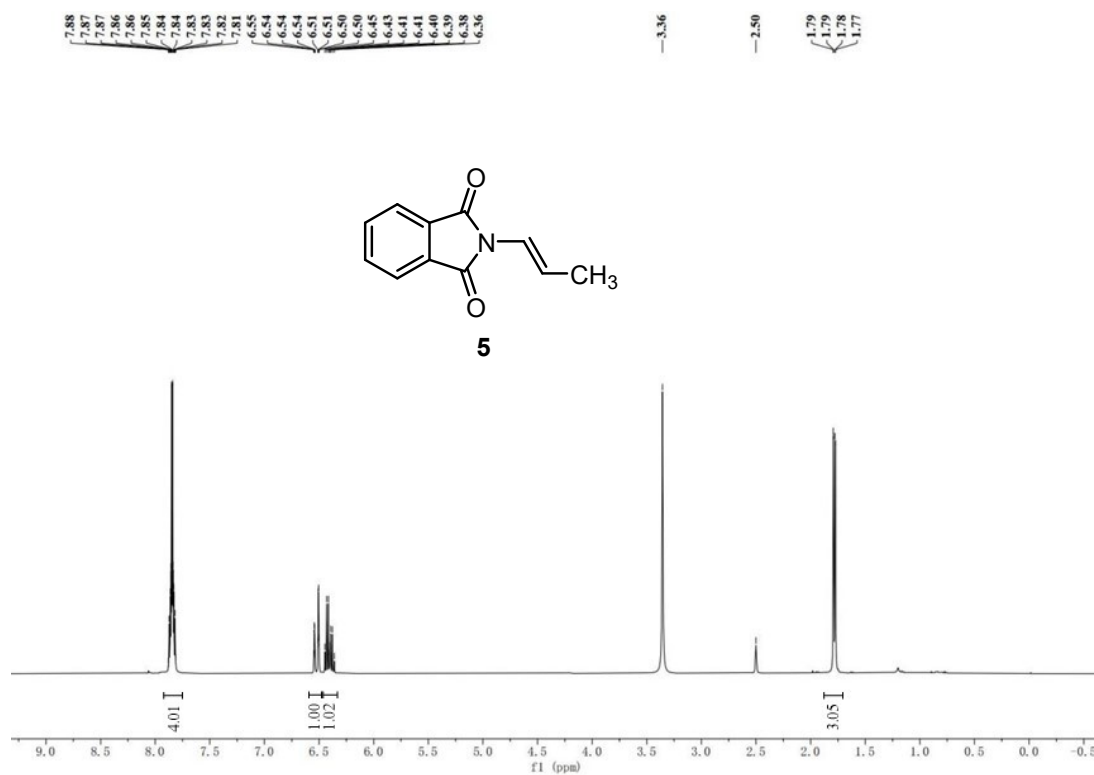

**Figure S61.** <sup>1</sup>H NMR spectrum of **5** in DMSO-*d*<sub>6</sub> (400 MHz).

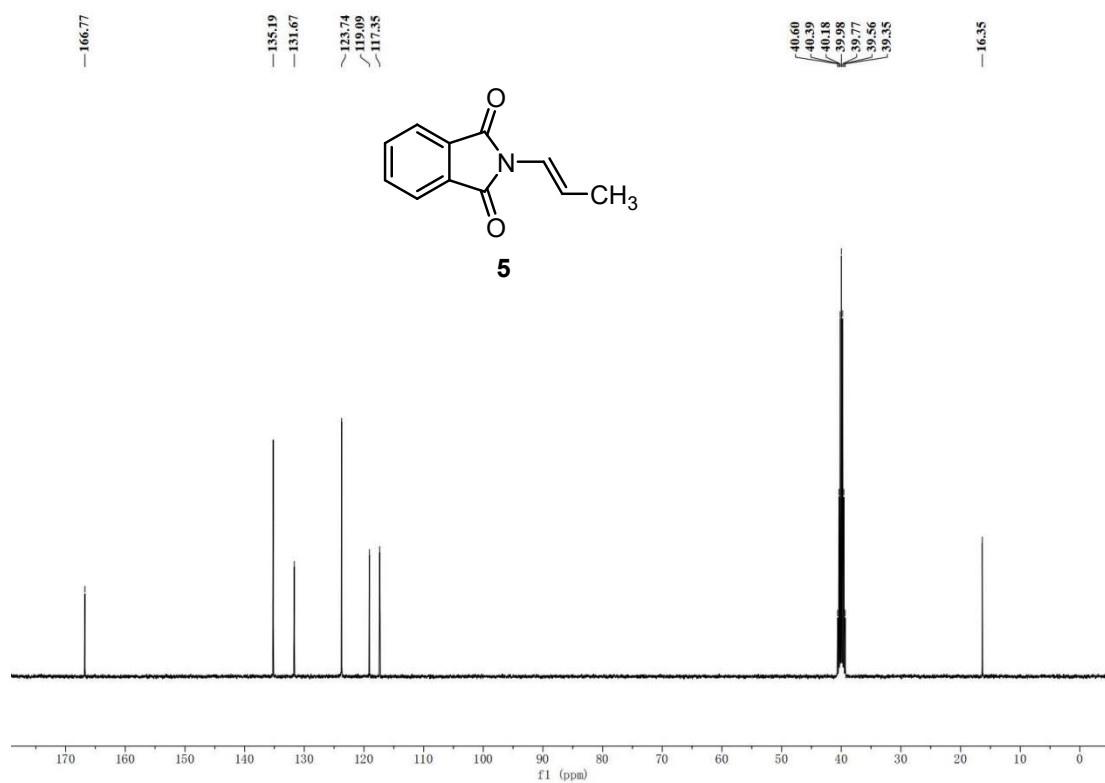

**Figure S62.** <sup>13</sup>C NMR spectrum of **5** in DMSO-*d*<sub>6</sub> (100 MHz).

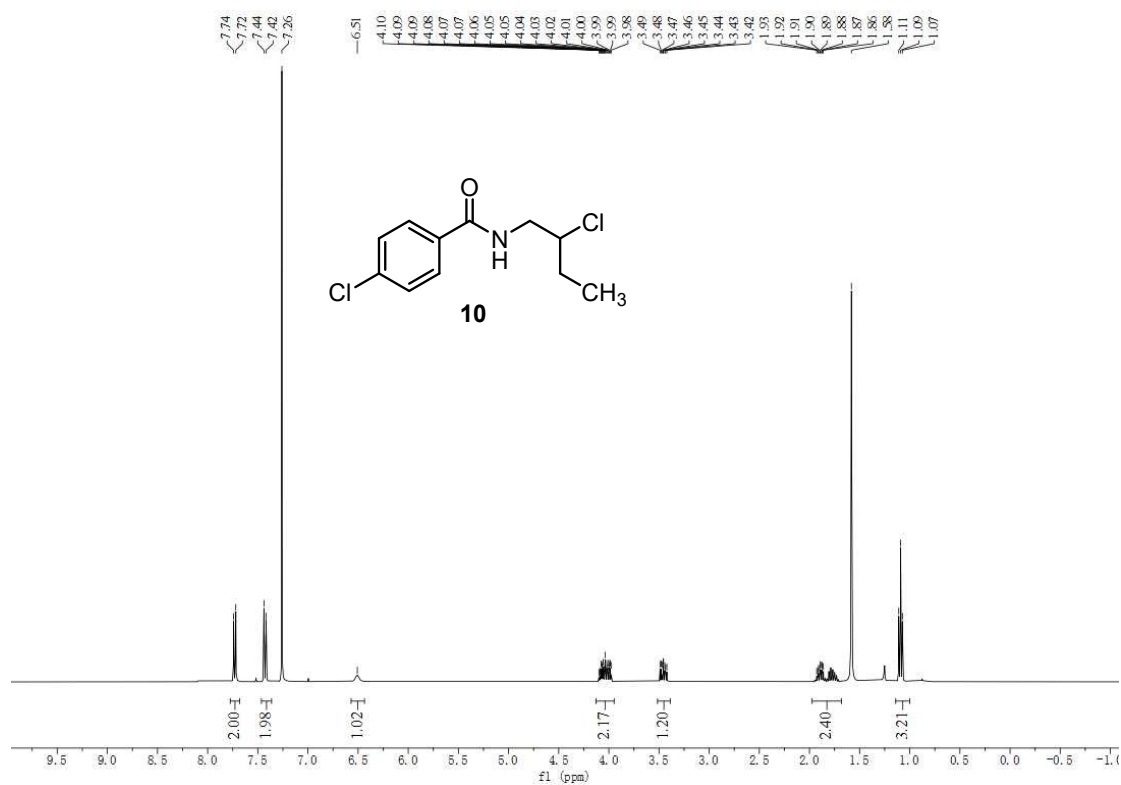

**Figure S63.** <sup>1</sup>H NMR spectrum of **10** in CDCl<sub>3</sub> (400 MHz).

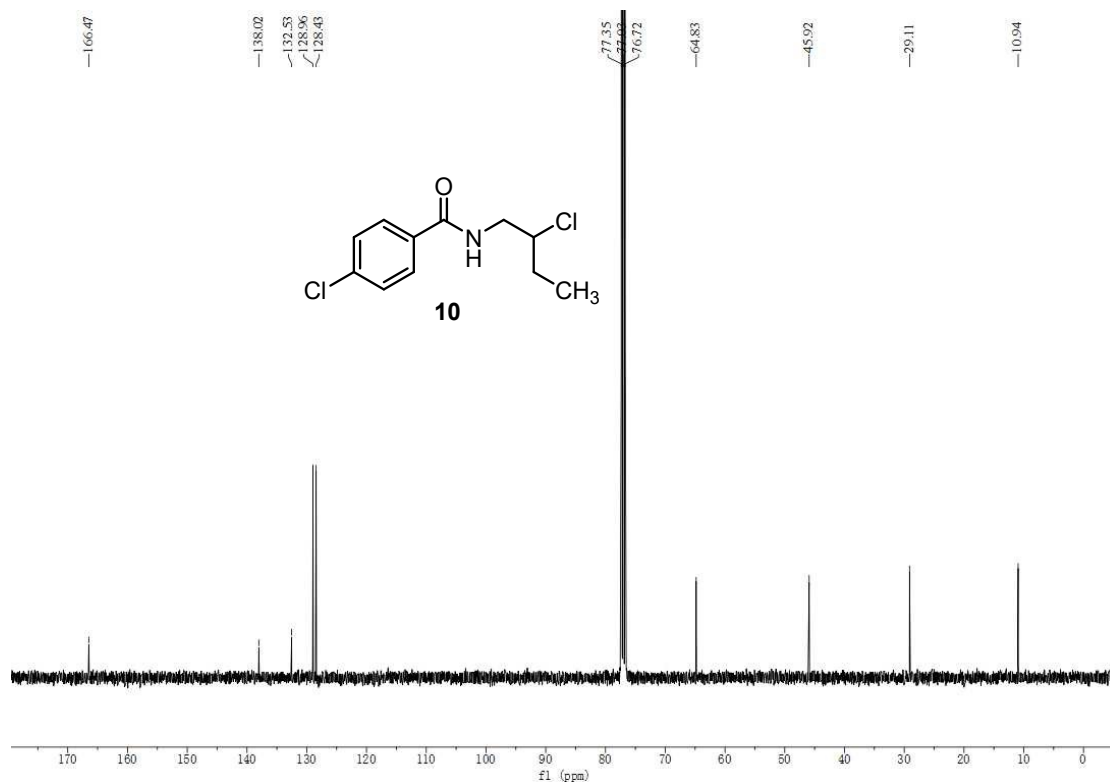

**Figure S64.** <sup>13</sup>C NMR spectrum of **10** in CDCl<sub>3</sub> (100 MHz).

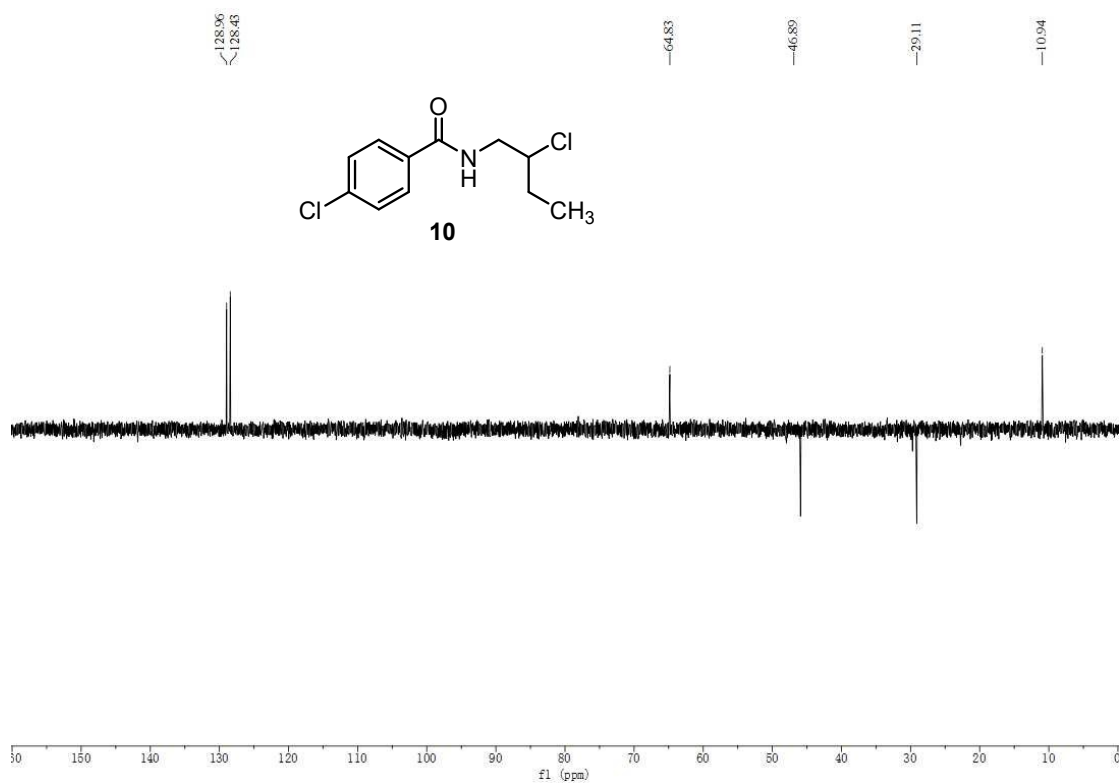

**Figure S65.** DEPT135 spectrum of **10** in  $\text{CDCl}_3$  (100 MHz).

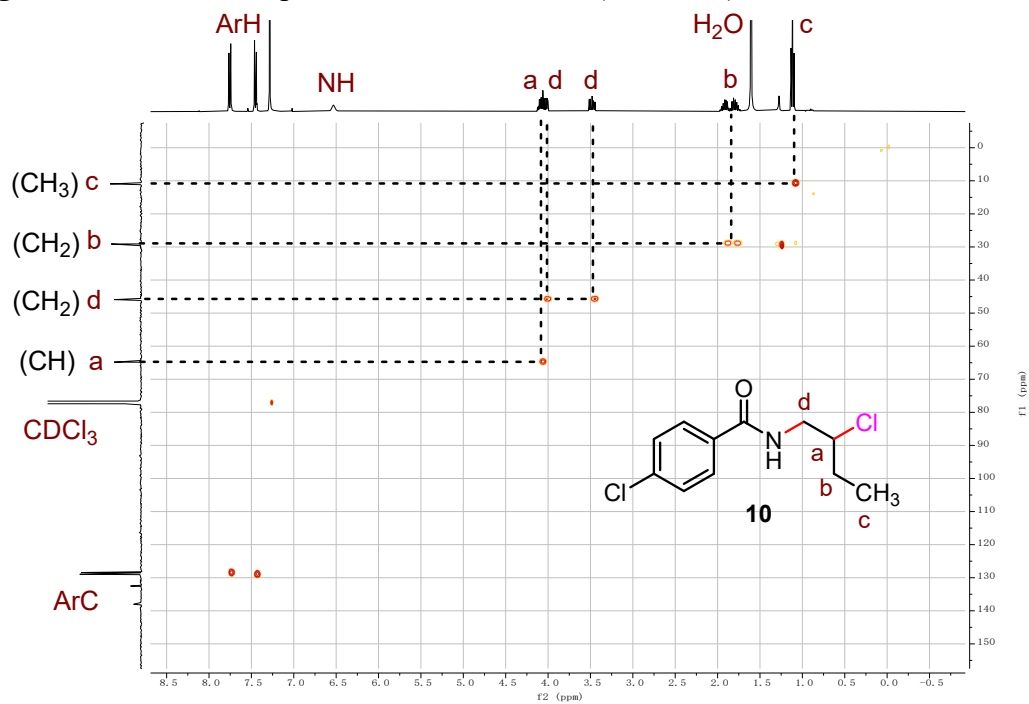

**Figure S66.** HMQC spectrum of **10** in  $\text{CDCl}_3$  (400 MHz).



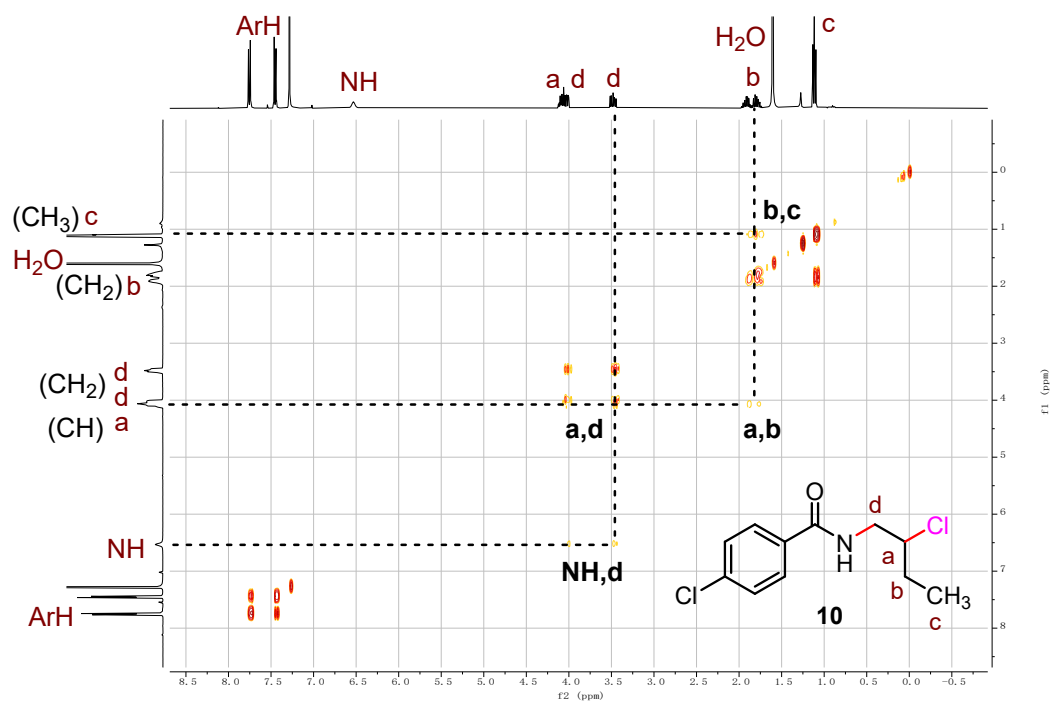

**Figure S67.**  $^1\text{H}$ - $^1\text{H}$  COSY spectrum of **10** in  $\text{CDCl}_3$  (400 MHz).

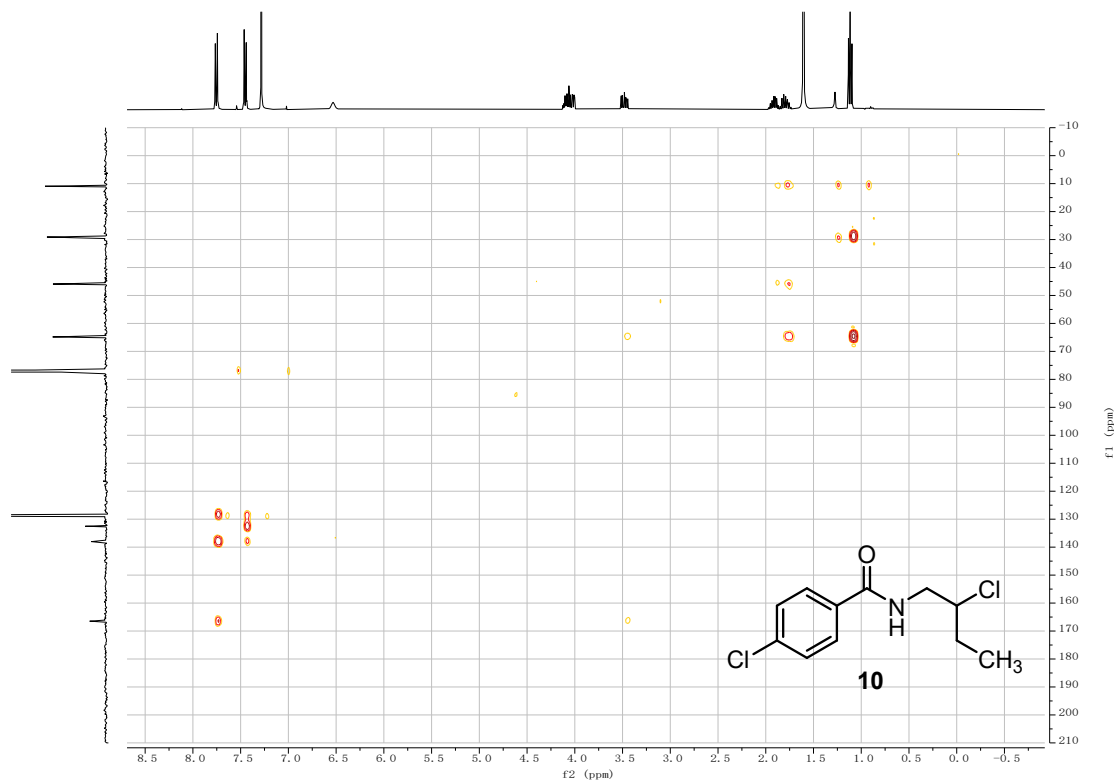

**Figure S68.** HMBC spectrum of **10** in  $\text{CDCl}_3$  (400 MHz).

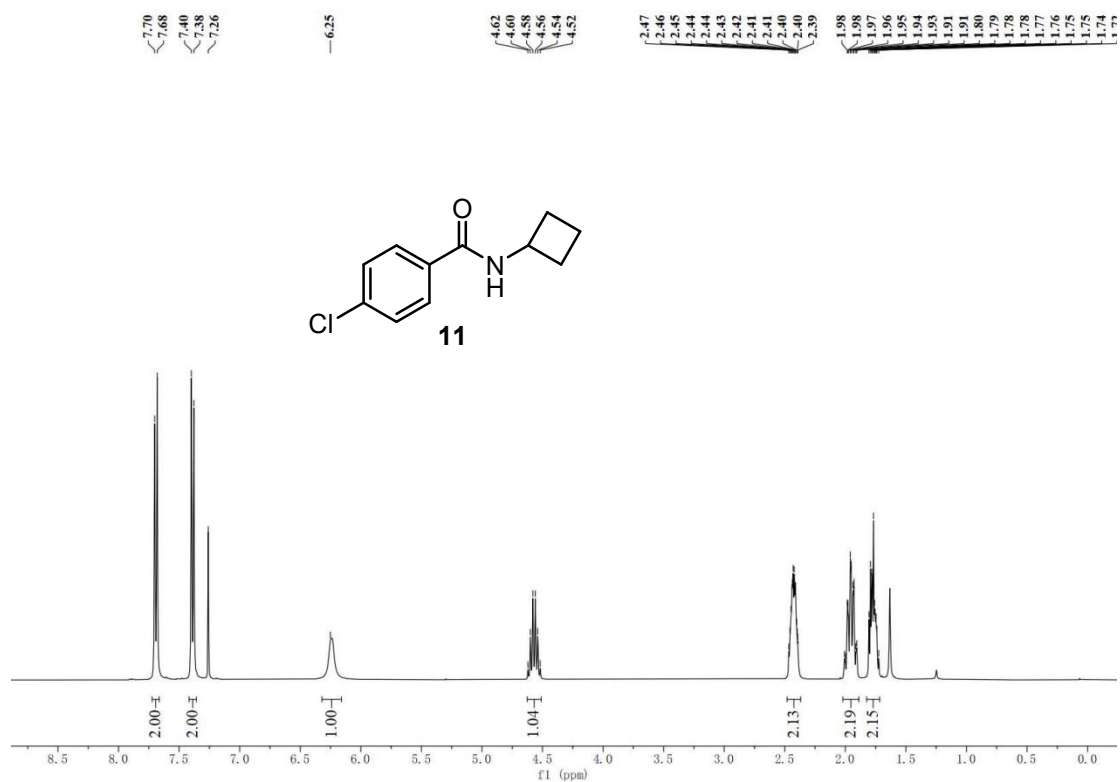

**Figure S69.** <sup>1</sup>H NMR spectrum of **11** in CDCl<sub>3</sub> (400 MHz).

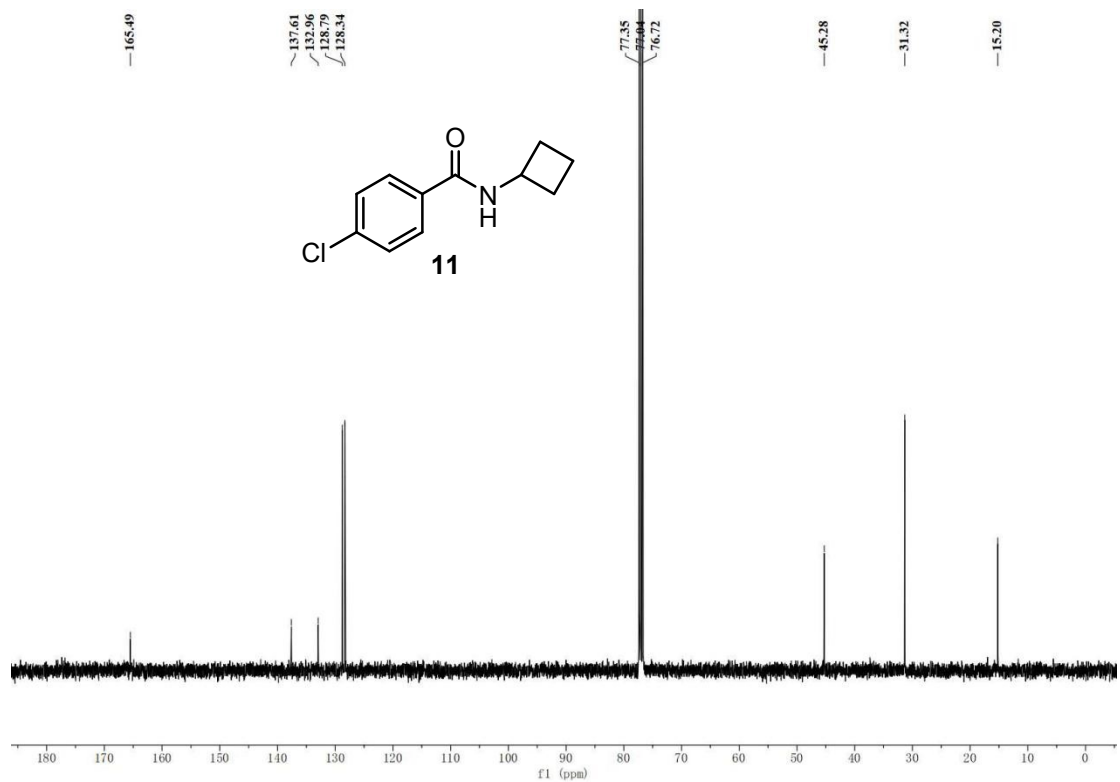

**Figure S70.** <sup>13</sup>C NMR spectrum of **11** in CDCl<sub>3</sub> (100 MHz).

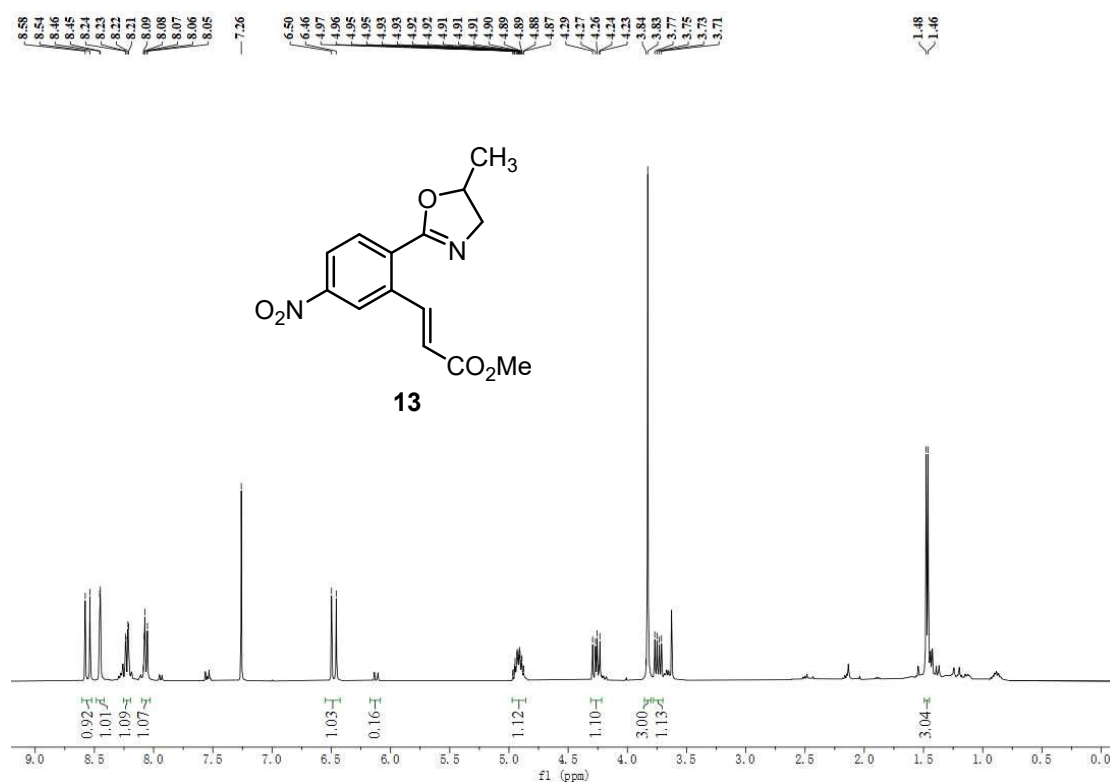

**Figure S71.** <sup>1</sup>H NMR spectrum of **13** in CDCl<sub>3</sub> (400 MHz).

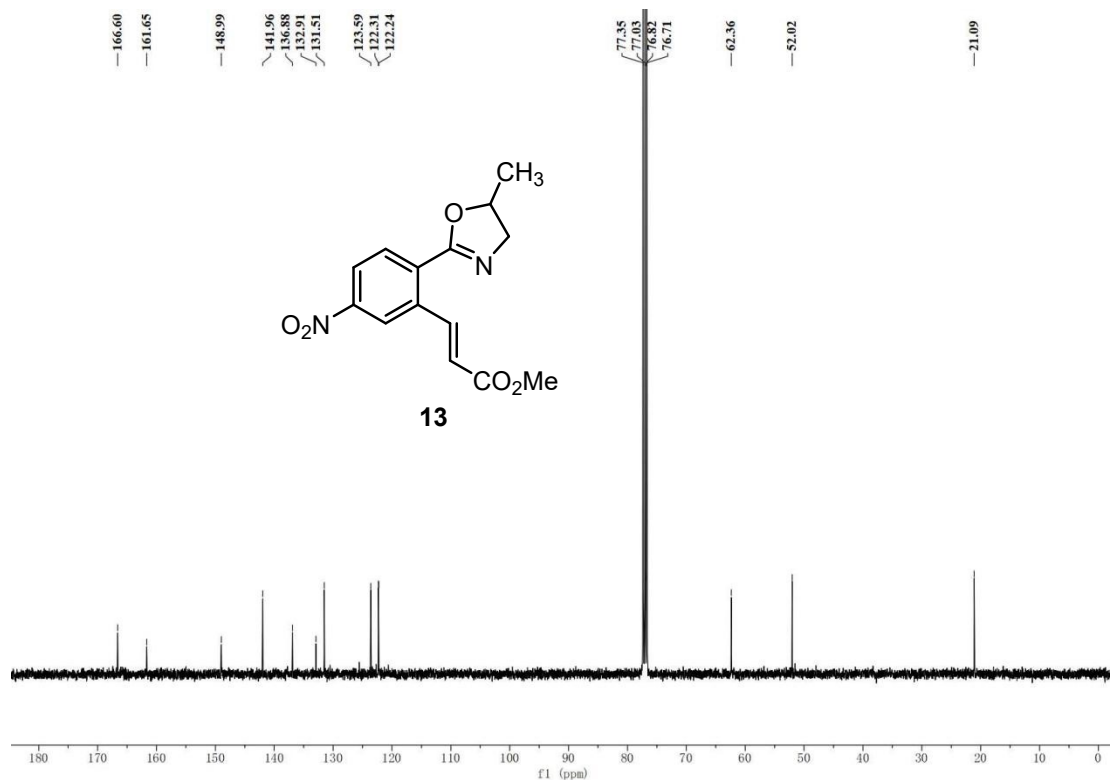

**Figure S72.** <sup>13</sup>C NMR spectrum of **13** in CDCl<sub>3</sub> (100 MHz).

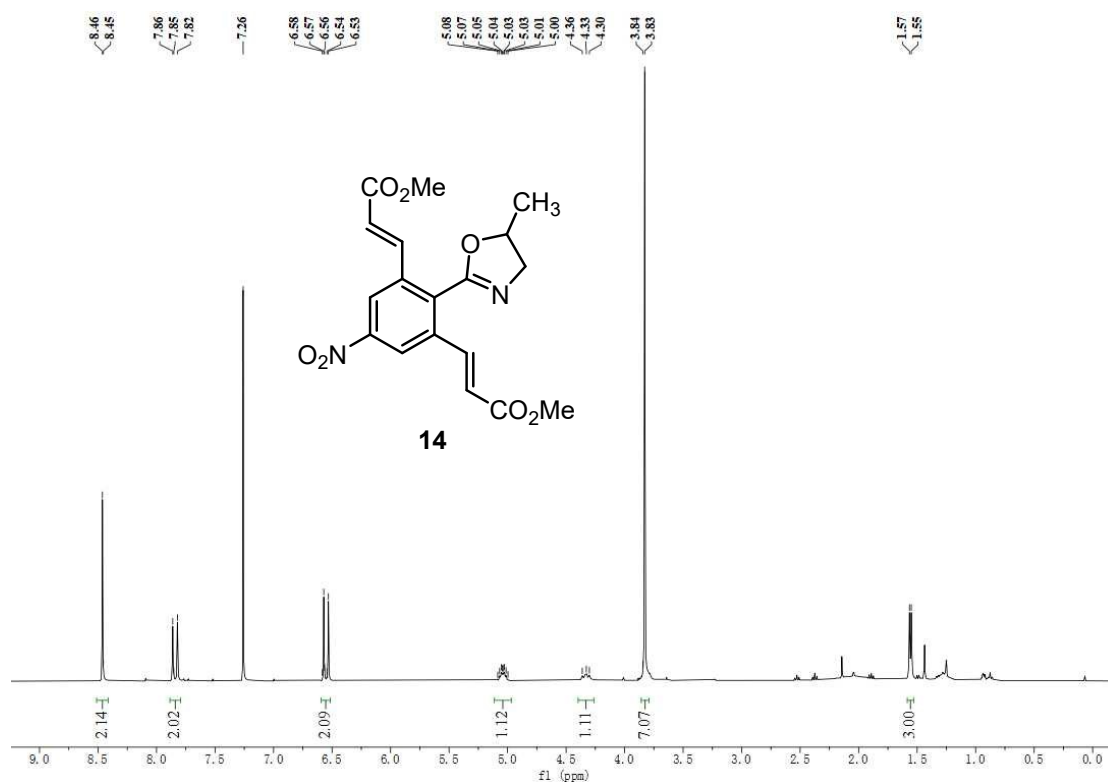

**Figure S73.** <sup>1</sup>H NMR spectrum of **14** in CDCl<sub>3</sub> (400 MHz).

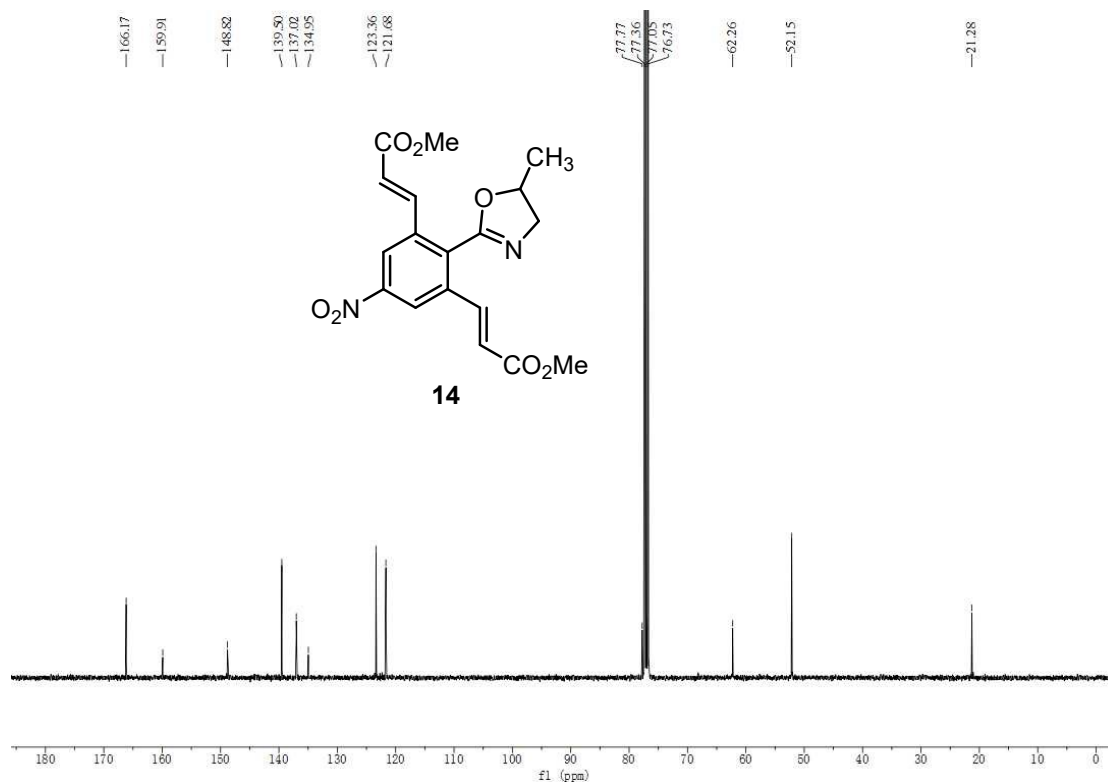

**Figure S74.** <sup>13</sup>C NMR spectrum of **14** in CDCl<sub>3</sub> (100 MHz).

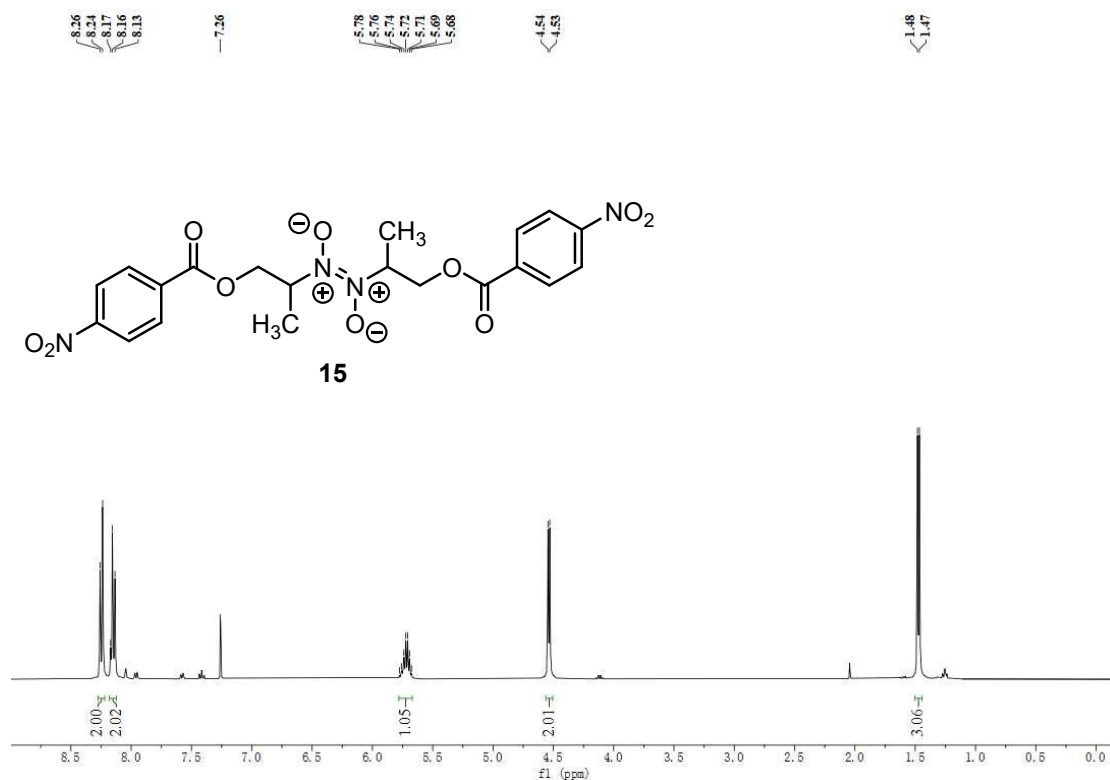

**Figure S75.**  $^1\text{H}$  NMR spectrum of **15** in  $\text{CDCl}_3$  (400 MHz).

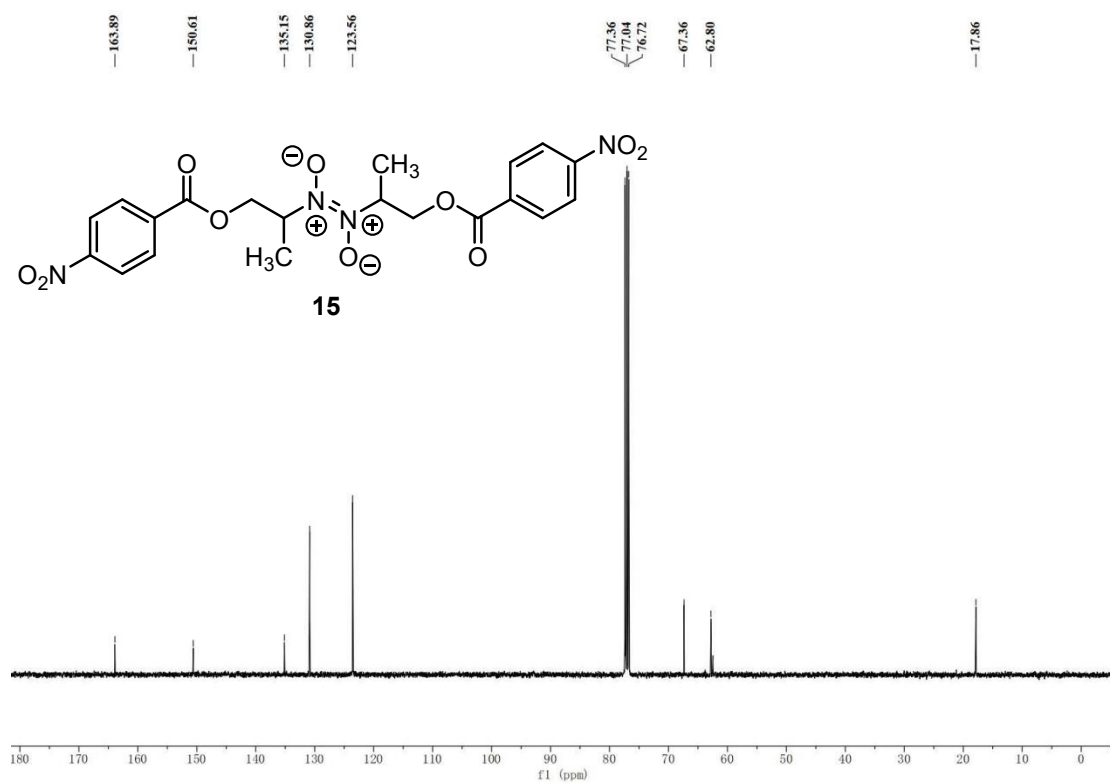

**Figure S76.**  $^{13}\text{C}$  NMR spectrum of **15** in  $\text{CDCl}_3$  (100 MHz).
